# Supplementary material for: Success and limiting factors in health service innovation: a theory-generating mixed methods evaluation of UK projects
Source: PubMed Central journal article supplement — BMJ Open. 2021 May 25;11(5):e047943. doi: 10.1136/bmjopen-2020-047943 (PMC8154942; doi:10.1136/bmjopen-2020-047943), 2021-05-25
Supplement: bmjopen-2020-047943.draft_revisions.pdf [file bmjopen-2020-047943.draft_revisions.pdf]

# BMJ Open

BMJ Open is committed to open peer review. As part of this commitment we make the peer review history of every article we publish publicly available.

When an article is published we post the peer reviewers' comments and the authors' responses online. We also post the versions of the paper that were used during peer review. These are the versions that the peer review comments apply to.

The versions of the paper that follow are the versions that were submitted during the peer review process. They are not the versions of record or the final published versions. They should not be cited or distributed as the published version of this manuscript.

BMJ Open is an open access journal and the full, final, typeset and author-corrected version of record of the manuscript is available on our site with no access controls, subscription charges or pay-per-view fees (<http://bmjopen.bmj.com>).

If you have any questions on BMJ Open's open peer review process please email [info.bmjopen@bmj.com](mailto:info.bmjopen@bmj.com)

# BMJ Open

## Understanding success and limiting factors in health service innovation: an empirically derived model

|                               |                                                                                                                                                                                                                                                                                                                                                |
|-------------------------------|------------------------------------------------------------------------------------------------------------------------------------------------------------------------------------------------------------------------------------------------------------------------------------------------------------------------------------------------|
| Journal:                      | <i>BMJ Open</i>                                                                                                                                                                                                                                                                                                                                |
| Manuscript ID                 | bmjopen-2020-047943                                                                                                                                                                                                                                                                                                                            |
| Article Type:                 | Original research                                                                                                                                                                                                                                                                                                                              |
| Date Submitted by the Author: | 15-Dec-2020                                                                                                                                                                                                                                                                                                                                    |
| Complete List of Authors:     | Leedham-Green, Kathleen; Imperial College London, Medical Education Research Unit, Faculty of Medicine<br>Knight, Alec; King's College London Faculty of Life Sciences and Medicine, School of Population Health & Environmental Sciences<br>Reedy, Gabriel; King's College London Faculty of Life Sciences and Medicine, Centre for Education |
| Keywords:                     | HEALTH SERVICES ADMINISTRATION & MANAGEMENT, Health policy < HEALTH SERVICES ADMINISTRATION & MANAGEMENT, Change management < HEALTH SERVICES ADMINISTRATION & MANAGEMENT, Quality in health care < HEALTH SERVICES ADMINISTRATION & MANAGEMENT                                                                                                |
|                               |                                                                                                                                                                                                                                                                                                                                                |

SCHOLARONE™  
Manuscripts

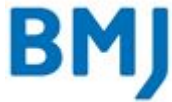

I, the Submitting Author has the right to grant and does grant on behalf of all authors of the Work (as defined in the below author licence), an exclusive licence and/or a non-exclusive licence for contributions from authors who are: i) UK Crown employees; ii) where BMJ has agreed a CC-BY licence shall apply, and/or iii) in accordance with the terms applicable for US Federal Government officers or employees acting as part of their official duties; on a worldwide, perpetual, irrevocable, royalty-free basis to BMJ Publishing Group Ltd ("BMJ") its licensees and where the relevant Journal is co-owned by BMJ to the co-owners of the Journal, to publish the Work in this journal and any other BMJ products and to exploit all rights, as set out in our [licence](#).

The Submitting Author accepts and understands that any supply made under these terms is made by BMJ to the Submitting Author unless you are acting as an employee on behalf of your employer or a postgraduate student of an affiliated institution which is paying any applicable article publishing charge ("APC") for Open Access articles. Where the Submitting Author wishes to make the Work available on an Open Access basis (and intends to pay the relevant APC), the terms of reuse of such Open Access shall be governed by a Creative Commons licence – details of these licences and which [Creative Commons](#) licence will apply to this Work are set out in our licence referred to above.

Other than as permitted in any relevant BMJ Author's Self Archiving Policies, I confirm this Work has not been accepted for publication elsewhere, is not being considered for publication elsewhere and does not duplicate material already published. I confirm all authors consent to publication of this Work and authorise the granting of this licence.

# Understanding success and limiting factors in health service

## innovation: an empirically derived model

Kathleen Leedham-Green<sup>1</sup> (corresponding author)

Alec Knight<sup>2</sup>

Gabriel B Reedy<sup>3</sup>

<sup>1</sup>Imperial College London, Medical Education Research Unit, Faculty of Medicine  
London, UK

[k.leedham-green@imperial.ac.uk](mailto:k.leedham-green@imperial.ac.uk)

<sup>2</sup>King's College London Faculty of Life Sciences and Medicine, School of Population Health &  
Environmental Sciences

London, UK

[alec.knight@kcl.ac.uk](mailto:alec.knight@kcl.ac.uk)

<sup>3</sup>King's College London Faculty of Life Sciences and Medicine, Centre for Education  
London, UK

[gabriel.reedy@kcl.ac.uk](mailto:gabriel.reedy@kcl.ac.uk)

### Keywords

Health services research

Diffusion of innovation

Organisational innovation

### Word count

4496

## Abstract

**Objectives** To illuminate the factors that are associated with innovation success in healthcare settings.

**Design** Exploratory analysis of a mixed methods survey that invited innovators to rate and describe the salience of factors identified from the literature in relation to their innovation's success, supplemented by interviews.

**Setting** The research explored innovations supported by one of the UK's Academic Health Science Networks which provides small grants, awards and structural support to health service innovators including academics, health and social care professionals, and third sector organisations.

**Participants** All 176 recipients of funding or support 2014-18 were invited to participate.

**Results** Responses were received relating to 56 projects, which were used to generate a model that conceptualises success along two axes: value creation ('did it work?') and diffusion ('did it embed or spread?'). An analysis of variance between categories of success indicated thirteen critical success factors relating to value generation; eleven relating to expansion of a valuable project; and five that were critical to both value creation and project expansion. Success factors were categorised into themes relating to expertise, leadership, organisational fit, structural support, societal alignment and participation. Additional limiting factors derived from qualitative responses included difficulties navigating the boundaries and intersections between organisations, professions, sectors and cultures; a lack of support for innovation beyond the start-up phase; a lack of protected time; and staff burnout and churn.

**Conclusions** A model has been derived via an analysis of these factors, providing targeted suggestions to enhance the success of future innovations.

## Article summary

### Strengths and limitations

- A strength of this research is that it compares a large number of innovations in a consistent way, and that it provides insights across a range of categories of success.
- A limitation of this research is that it is situated in a single healthcare context; however, repeating these methods in different contexts should produce locally relevant results.
- Few mid-level theories relating to innovation are grounded in data that include projects that have not achieved their intended outcomes; therefore, we may have identified novel limiting factors.
- Many of the success factors we have identified are not unique to this study; however, they have been subjected to further statistical analysis and were found to be significant in this context.
- More research is needed to examine whether addressing these factors prospectively enhances the success of future innovations.

# Understanding success and limiting factors in health service innovation: an empirically derived model

## Background

Healthcare systems worldwide are faced with increasing demand linked to the rising burden of disease within a resource-constrained environment <sup>1</sup>. This has led to a pressing need to find and disseminate innovative ways of meeting the healthcare needs of patients and communities in ways that are more sustainable <sup>2</sup>. The World Health Organisation characterises health service innovation as “a novel set of behaviours, routines, and ways of working that are discontinuous with previous practice, are directed at improving health outcomes, administrative efficiency, cost-effectiveness, or users’ experience and that are implemented by planned and coordinated actions” <sup>3</sup> (p7).

Academic efforts in the health sciences continue to sharpen the focus on impact, rather than the creation of ‘new knowledge’ as the primary goal of research activity. At the vanguard are those who work to translate research and innovation into clinical practice, navigating institutional, organisational, structural and cultural complexities to improve services <sup>4</sup>. New support structures have emerged, such as the fifteen Academic Health Science Networks set up in the UK in 2013 by NHS England, with funding streams that aim to support and encourage innovation at various levels <sup>5</sup>. After more than half a decade of programme grants, the impact of these innovation programmes is a legitimate subject of enquiry: how and why have certain innovations become normalised, sustained or spread, and why have others struggled or not been integrated into the NHS?

The knowledge created from and through a single innovation is complex and context-dependent, providing insights that, while transferrable, may not necessarily be predictive of outcomes. Shifting the unit of analysis away from examining individually-reported project outcomes, which are necessarily heterogenous, towards examining a larger corpus of projects, may offer insights into the factors that differentiate between successful and unsuccessful innovations. This study thus sets out to explore a large number of innovations, both as individual projects in their unique local contexts, and as part of a larger programme of activity.

The published literature on healthcare innovation contains few analyses of unsuccessful innovations, despite attempts to encourage negative reporting <sup>6</sup>. By evaluating a large set of funded projects, we have a unique opportunity to examine those that were successful and compare them with struggling or less successful innovations.

1  
2  
3 Our research aim is therefore to explore what experienced innovators, as key informants, feel has  
4 impacted on the success of their innovation; and from this, to produce an empirically-derived  
5 explanatory model. By isolating the factors that differentiate between categories of success, our aim  
6 is to inform and enhance the success of future innovations.  
7  
8  
9

## 10 11 Methods

### 12 13 Methodology and theoretical framing

14 This study is situated at the intersection of policy, social sciences, and organisational research. Our  
15 philosophical assumptions are that there are real differences in the success of innovations, but also  
16 that success is fundamentally a subjective construct. Any research will only produce an  
17 approximation of the truth, and findings must be interpreted with an appreciation for context. We  
18 therefore position this research at the boundary of critical realism and constructivism <sup>7</sup> and have  
19 adopted a mixed methods design <sup>8</sup>. We have used quantitative methods to explore the salience of  
20 potential success factors, and qualitative methods to validate, expand and illuminate those factors.  
21  
22  
23  
24  
25  
26  
27

### 28 29 Context

30 The Health Innovation Network (HIN) is one of the nationally-funded Academic Health Science  
31 Networks set up by NHS England in 2013. It provides small grants, awards and structural support to  
32 academics, health and social care professionals and third-sector organisations, supporting service-  
33 level innovations to improve outcomes and value, including the sustainable use of resources. All  
34 recipients of HIN funding and support during 2014-2018 were invited to participate.  
35  
36  
37  
38

### 39 40 Research team and ethics

41 The research was commissioned by HIN in collaboration with Health Education England and  
42 conducted by an independent research team at King's College London. The research team comprised  
43 a postdoctoral educational psychologist/learning scientist (GR), a postdoctoral occupational  
44 psychologist/health services researcher (AK), and a medical education research fellow (KLG). None  
45 were in a position of power or influence over participants, and the research was carefully designed  
46 to be conducted at arm's length from the funding agency. Responses were anonymised and  
47 decontextualised by the research team to encourage innovators to comment critically and safely  
48 about their own projects.  
49  
50  
51  
52  
53

54 The research team sought ethical approval from the Research Ethics Committee of Kings College  
55 London (LRS-18/19-10432).  
56  
57  
58  
59  
60



## Patient and public involvement

There was no patient involvement. The subjects of this research were health service innovators who were involved in the survey design and in checking back our interpretation.

## Data generation

The research process (summarised in Figure 1) began with a simultaneous nested design<sup>8</sup> survey based on success factors for healthcare innovations identified through a systematic review of the literature<sup>9</sup>. We conducted five scoping interviews to validate the content and scope of the survey and improve the clarity and usability of the questions and instructions. This identified one further theme that had not appeared in the systematic review (personal factors), with six related sub-factors.

### Figure 1: Research overview

The survey (summarised in Figure 2, full text in supplementary data) asked respondents to:

- a) Describe and categorise their project's current status.
- b) Score statements relating to the impacts of 56 factors on their project, grouped into nine themes on a five-point Likert scale.
- c) Provide qualitative insights into each of the nine themes.

We conducted five follow-up interviews with survey participants to cross-check emergent findings and to explore contextual factors in greater depth.

### Figure 2: Survey scope

## Survey distribution

We distributed the survey by email in August and September 2019 to all 176 named recipients of HIN funding awards, grants and bursaries. A reminder was distributed four weeks later to non-responders. Projects that had received more than one award were sent a single survey, and participants who had run more than one project were sent a separate survey for each project.

## Results and analysis

We received 63 responses, but seven were incomplete or duplicate so a total of 56 responses (31.8% of 176) were included in the analysis. Survey respondents self-identified within one or more of the following groups: the project leadership team (n=54); service delivery team (n=9); training team (n=9); administrative team (n=6); service lead (n=2); and patient/service user (n=1). Several respondents identified within multiple groups.

1  
2  
3 Projects were situated in secondary care (n=19); community care (n=14); academic sector (n=5);  
4 mental health sector (n=4); online (n=4); primary care (n=3); and the hospice sector (n=2), with the  
5 remainder working at the interfaces between services, or across sectors.  
6  
7

8 The innovation projects related to new ways of working in areas including: end-of-life care; disability  
9 enablement; support for complex or vulnerable patients; discharge support; pain management;  
10 recovery and rehabilitation; chronic conditions; new models of integrated health and social care;  
11 health promotion; and novel simulation and workforce development strategies.  
12  
13  
14

## 15 16 Development of categories of success

17 We categorised projects into grades of success based on how the respondent self-categorised their  
18 project, triangulated against the rest of their survey responses. The final categories of success were  
19 derived through an iterative process, involving two researchers agreeing a descriptive summary of  
20 the status of each project, grouping similar projects together, and constructing an emergent  
21 framework that accounted for all the cases in the set.  
22  
23  
24

25 The final framework scored projects on two axes, the first relating to whether the innovation was  
26 reported as realising its intended value ('did it work?'); the second according to whether it was  
27 extended in time or place ('did it embed/spread?'). The framework used for categorisations is  
28 illustrated in Figure 3, with the number of innovations in each category shown in brackets.  
29  
30  
31  
32

### 33 34 **Figure 3: Framework for categorisation of success within health service innovation**

## 35 36 Success factor analysis

37 We adopted an exploratory approach to data analysis, which aims to generate rather than test  
38 theory<sup>10</sup>. We conducted an analysis of variance for each of the 56 scored factors (Kruskal-Wallis  
39 non-parametric one-way ANOVA using IBM® SPSS® v25) to see whether there were significant  
40 differences between categories of success across the horizontal 'value creation' axis and the vertical  
41 'expansion' axis. First, we compared innovations that had demonstrated lower than expected value  
42 (n=11), value as expected (n=25), and higher than expected value (n=20). Next, we compared  
43 innovations that had diminished in scope or stopped (n=17), innovations that were running as  
44 expected (n=16), and innovations that had become extended in time or place (n=23). Finally, we  
45 excluded low-value projects and analysed again across the expansion axis (n=10, n=12, and n=23,  
46 respectively), seeking to explore why innovations with proven value had failed to embed and spread.  
47  
48  
49  
50  
51

52 For each factor that was identified as being significantly different between categories of success, we  
53 conducted a post hoc analysis to confirm the direction and consistency of the association. A graded  
54  
55  
56  
57  
58  
59  
60

1  
2  
3 'exposure-response' relationship across all three categories of success would be expected if a factor  
4 genuinely drives success<sup>11</sup>. Where a graded relationship was not present, this is discussed in Table 1.

5  
6  
7 Our quantitative analysis is presented in Table 1 with significant results ( $p < 0.05$ ) shaded in green. At  
8 this level of significance, there is a 1 in 20 probability that a result is in fact random. We have used  
9 lighter shading to indicate a slightly nuanced grading of significance around this figure, to indicate  
10 which factors might potentially be significant, or which could be found not to be significant if the  
11 power of the study was increased. The final column gives our interpretation of the more significant  
12 findings ( $p < 0.05$ ) that takes into consideration our post hoc analysis.

13  
14  
15  
16  
17 Many factors have been found to be similarly scored across all categories of success. This does not  
18 mean that these factors are not important, only that they do not differentiate between categories of  
19 success and are therefore unlikely to be the underlying cause of the relative success or failure of a  
20 project.  
21  
22  
23  
24

### 25 **Table 1: Analysis of variance of potential success factors across categories of success**

26  
27 Our analysis of variance between categories of success indicated thirteen critical success factors  
28 relating to value generation; eleven relating to expansion of a valuable project; and five that were  
29 critical to both value creation and project expansion. We have grouped these into themes relating to  
30 expertise, leadership, organisational fit, structural support, societal alignment and participation  
31 which we discuss below, illuminated by quotes. Survey respondents are indicated by R(n) and follow-  
32 up interview respondents by FI(n).  
33  
34  
35  
36  
37

#### 38 **Project-related factors**

39 Interestingly, none of the project-related factors turned out to be critical to success. Both successful  
40 and unsuccessful innovations were similarly designed to address an important healthcare need that  
41 was concerning to the public. All funded projects were required to articulate a credible evidence  
42 base arguing that stated benefits could be achieved through the project plan.  
43  
44  
45  
46

#### 47 **Resourcing and expertise**

48 Primary resource-related success factors were associated with the workforce. Non-critical factors  
49 included infrastructure (such as buildings, materials and supplies), which were reported as sufficient;  
50 information technology support, which was moderately good across all categories of success; and  
51 funding issues, which were also similar across all categories of success. However, having the right  
52 numbers of staff with the right skill mix was a highly significant factor, both in terms of the project  
53 being able to realise its intended value, as well as for it to become embedded or spread. Time and  
54 energy were critical to whether successful innovations became embedded or spread, as were  
55  
56  
57  
58  
59  
60

1  
2  
3 administrative and educational support, including the availability of ongoing development support  
4 (e.g. orientation and training for new staff, or to build capacity). Expertise was critical across all  
5 categories of success, both in terms of the innovator feeling they had the right skills, experience or  
6 training; the project having access to staff with the right skills; and having external expert input  
7 where needed.  
8  
9

10  
11  
12 “As the project was run within [*university*] and [*tertiary hospital trust*], there was plenty of  
13 expertise to call upon as required.” R6  
14

15 “The programme support sat with one individual rather than a team and as highlighted  
16 previously the administrative/programme support hadn't been entirely  
17 appreciated/factored in at the outset of the programme.” R16  
18

### 19 External factors

20  
21 External factors appeared to correlate with whether a project was able to realise its intended value,  
22 but less so with its expansion. However, as the effect size didn't grow consistently across categories  
23 of value creation, we cannot infer a causal relationship<sup>11</sup>. Qualitative comments indicated that  
24 projects that were able to align themselves to current political or societal agendas, such as mental  
25 health, were more successful. Conversely, those attempting to work in relatively less topical areas of  
26 practice, such as audiology, described difficulty securing strategic funding.  
27  
28  
29

30  
31  
32 “The project piggy-backed on the current social movement highlighting the needs of mental  
33 health.” R18  
34

35 “Hearing has always been the poor relation to other health issues even though everyone  
36 knows someone struggles with their hearing either family or friends.” R35  
37

### 38 Organisational factors

39  
40 Our analysis of organisational factors indicated that the ability of an innovation to integrate into  
41 existing organisational structures, programmes or policies was critical to whether it became  
42 embedded or spread, and possibly also to its ability to create value ( $p=0.059$ ). Successful projects  
43 showed evidence of adapting where necessary to achieve a good fit within organisational priorities.  
44 For the most part, host organisations were described as having a positive learning culture and were  
45 ready and able to undertake innovative initiatives, however even innovations with proven value  
46 were unable to survive if there was opposition within the host organisation.  
47  
48  
49

50  
51  
52 “There was also a disconnect between commissioner priorities & [*the host organisation's*]  
53 priorities in relation to the programme, which impacted on its sustainability & roll-out.” R16  
54

### 55 Personal factors

56  
57 Few respondents reported being released from other duties so that they could implement their  
58 initiative. However, most respondents said they benefited from a supportive peer culture.  
59  
60

1  
2  
3 Respondents who were able to realise value were significantly more like to say they were internally  
4 motivated, had ownership of and commitment to their project, and found success rewarding.

5  
6 “I was very motivated to implement this project which was demanding as I had no protected  
7 time for it. Nonetheless, you do what is needed to achieve a goal.” R18

8  
9  
10 “I am very proud of our achievements and that the work has become a routine part of our  
11 culture and system of working” R28

## 12 13 14 Project management

15 Most projects measured or assessed the outcomes and impacts of the project, though this appeared  
16 to be more common in successful projects ( $p=0.060$ ). Projects with high value were able to  
17 demonstrate and share this success.

18  
19  
20 “The ongoing reporting allowed for the results to be understood early in the project, shared  
21 and used in the strategy for delivering education across South West London” R5

22  
23 “A robust evaluation was undertaken of the programme, along with regular review points to  
24 inform adaptations/opportunities for improvement.” R16

25  
26 Leadership appeared to be a highly significant success factor across all categories of success, with  
27 struggling or unsuccessful projects citing leadership failures.

28  
29  
30 “Leadership hasn't been invested in providing the platform for the workshops & curriculum  
31 to be rolled out. Lip service given by leadership.” R56

## 32 33 Participation

34 Distributed decision making was a critical success factor across all definitions of success and was  
35 present in *all* projects that were embedded or spread. Participatory approaches were significantly  
36 associated the ability of an innovation to generate value. These participatory processes related to  
37 the staff delivering the innovation, the intended beneficiaries, and the communities in which the  
38 innovations were situated.

39  
40  
41 “We always express the value of our service users, administrator, and other members of the  
42 team and meet regularly to discuss well-being, progress, and evaluation.” R33

43  
44  
45 “We had members across all organisations attend and participate which ultimately lead to  
46 sustainability and better relationships being formed.” R17

47  
48  
49 “We've had some sort of service user involvement all the way through... that's really  
50 improved the way we've reflected and talked... it gives a genuineness to what we're trying to  
51 achieve... the fact that you go and work with the associates and carers, you actually go and  
52 look at the environment, you spend time with the nurses that you're going to be teaching  
53 and all the other people that you're working with, really helps to, you know, it definitely  
54 adds value to the project.” F13  
55  
56  
57  
58  
59  
60

## Supportive network

Finally, one of the most significant differentiating factors across all categories of success was the presence of a collaborative network of people/organisations that helped to support and sustain the initiative.

“There was a single practitioner using the resource on her own, and now it is nationally recognised... Without that level of support: the time, the people and the resources, we wouldn't have got anywhere. It's been a fantastic level of support. They designed an implementation toolkit to support practitioners embedding the programme locally.” F12

“The continued support has enabled the project to continue. There is growing national interest.” R48

“The team at the Health Innovation Network were fabulous and so supportive.” R12

“There are innovators out there who are doing things on their own, and the person I'm thinking about is not in a very good place. He's got virtually no support, and I don't know how he does it.” F12

## Limiting factor analysis

In addition to the above success factors, the following limiting factors were identified through our qualitative analysis of failed or struggling projects. These included difficulties navigating the boundaries and intersections between organisations, professions, sectors and cultures; a lack of support for innovation beyond the start-up phase; a lack of protected time; and staff burnout and churn.

## Boundaries between commercial, voluntary and public sectors

While UK healthcare is primarily publicly funded and provided by the National Health Service (NHS), social care is often commercially provided<sup>12</sup>, creating the potential for friction at the interfaces between these sectors.

*“As the care homes are private businesses, there was some lack of political will to embrace the training, as there was a view that although there was the potential to improve health outcomes for the residents, the manager did not feel there were sufficient resources to implement the required training” R4*

Commercial organisations were reported as unwilling to release staff for training, unless the value of that training was felt within the organisation. Valuable initiatives by the voluntary sector to train social care staff, but which provided benefits in the healthcare sector, fell between sectors and were potentially unviable without direct funding.

*“The voluntary sector is happy to participate but there is no spare capacity within it unless there is a financial package that can go with it.” R35*

1  
2  
3 There was concern that privately-funded organisations were not subject to the same standards and  
4 mandates as the publicly funded bodies, and were failing to invest in training.  
5

6  
7 *“Because it is not mandated, organisations do not have to engage with or release staff for*  
8 *education.”* R2  
9

10  
11 Restructuring within the NHS has created a set of semi-autonomous institutions and organisations  
12 with different and sometimes competing priorities<sup>13</sup>. Some participants described difficulty aligning  
13 project aims to multiple organisational goals.  
14  
15

16  
17 *“There were tensions between the two boroughs in relation to approach & resourcing. There*  
18 *was also a tension between commissioner expectations and practice/federation expectations*  
19 *which have impacted on the programmes sustainability.”* R16  
20

21  
22 *“So, this intervention has a good return on investment, for every £1 you spend you get a*  
23 *return of £5.20. And they'll say, I'm the one making the investment, but he's the one making*  
24 *the return here. I've got a budget; he's got another budget. We might both be in the health*  
25 *system, but I'm not going to spend my money if he's the one getting the return.”* F12  
26  
27  
28

## 29 30 Workplace cultures and priorities

31 Some projects reported finding non-healthcare workers receptive to health-related training,  
32 however some failed or struggling projects found this a challenge.  
33  
34

35 *“medicines delivery teams unwilling to take on additional role”* R61

36  
37 *“There were concerns raised by care home managers that the initiative would cause undue*  
38 *responsibility on individuals to make clinical decisions.”* R16  
39

40 Participants described differences between academic and workplace learning cultures, and variable  
41 receptiveness of front-line clinical staff to change. Some described resistance to outsiders telling  
42 healthcare workers how to improve. This may reflect the inverse of high value projects, which were  
43 found to engage in participatory practices, engaging patients, front-line staff and communities in co-  
44 designing their innovation.  
45  
46  
47  
48

49  
50 *“It has been difficult to embed these products due to structural issues within the staff teams.*  
51 *(Nursing) It was clearly not seen as a priority.”* R20  
52

53  
54 *“I think the main insight I would have is that when working with mental health nursing teams*  
55 *the researcher and research team needs to be fully integrated into team(s) and seen as part*  
56 *of the culture. Being an outsider does not seem to work as day to day practice seems to*  
57 *regulate research.”* R20  
58  
59  
60



1  
2  
3 Participants also described tensions between management priorities and the priorities of those  
4 working directly with patients.  
5

6  
7 *"No interest on part of management. I don't think they have even read it."* R57  
8

9  
10 *"The initiative was welcomed at service level, however there was little interest at senior  
11 management level."* R52  
12

13  
14 *"There is such a dislocation between commissioning and what is happening on the ground."*  
15 F12  
16

### 17 18 Lack of support beyond the start-up phase

19 Participants noted ongoing privileging of new innovation over sustaining, embedding, or helping  
20 spread innovations that have already demonstrated their value. For example, clinical academics do  
21 not gain publications for ongoing maintenance of innovative practice:  
22

23  
24 *"research remit probably wouldn't cover [further dissemination] unless there was a good  
25 likelihood of REFability"* ["REF" refers to the Research Excellence Framework, a scoring  
26 system used to fund the university sector] R1  
27  
28

29  
30 Participants described innovation funding streams, but articulated difficulty securing funding beyond  
31 the start-up phase.  
32

33  
34 *"The project was resourced sufficiently for the pilot. However, once the pilot finished so did  
35 the project."* R5  
36

37  
38 *"the education faculty and funding is driven towards innovation and not sustainability - this  
39 de-incentives individuals from continuing with existing projects"* R8  
40  
41

### 42 43 Burnout, turnover and lack of protected time

44 Participants described projects that were limited by staff burnout, turnover, and a lack of protected  
45 time.  
46

47  
48 *"My commitment to the project was there however the resources I had to continue with  
49 project were limited due to competing pressures on my time."* R12  
50

51  
52 *"The programme required more administrative support than anticipated & this ended up  
53 being an ask over & above someone's day job for a prolonged period of time"* R16  
54

55  
56 *"the most important person was our pharmacist who moved from the pharmacy a few  
57 months after we started!"* R61  
58  
59  
60



## Risk as integral to innovation

Finally, it is worth noting that participants felt that risk was a necessary ingredient of healthcare innovation and should also be rewarded. Innovations that fail to demonstrate value should be supported in folding without hesitation, and lessons shared.

*“The project demonstrated that this initiative was not a model that would work in the hospital environment hence could not be embedded” R30*

## Discussion

We have proposed a model for understanding success in health service innovation that has two discrete axes: one relating to whether or not the innovation created value; the other relating to whether it was extended in time or place. We identified 56 potential success factors from the literature and interviews, and distributed a survey exploring these factors to 176 innovators. An exploratory analysis of 56 responses has enabled us to determine which factors were significantly associated with success across both axes. Additional limiting factors were determined through an inductive qualitative analysis of responses and through follow-up interviews. We have arranged these factors into themes to create a nested hierarchy illustrated in figure 4.

### **Figure 4: Nested hierarchy of success factors and limiting factors for health service innovation**

Within healthcare services, the issue of diffusion and sustainability of innovation has received widespread academic attention pioneered by Greenhalgh et al. (2004) who drew on Rogers' seminal text on Diffusion of Innovations (1962). There have been many subsequent notable academic contributions<sup>14-18</sup>. Nilsen (2015) proposed an overarching framework of healthcare implementation theories according to the aim of the theory<sup>19</sup>. Theories such as those about innovation sustainability, which include the Diffusion of Innovation theory, were categorised as "determinant frameworks", as they posit general types of factors that can influence the success of an innovation. We believe that our findings contribute through empirical evidence to theoretical development at this level, and thus may have predictive implications. Davidoff et al. (2015) describes Grand, Mid-Range and Programme Theories<sup>20</sup>. Grand Theories are formulated at a high level of abstraction and make generalisations that apply across many different domains. Mid-Range Theories (e.g. Diffusion of Innovation) are posited at an intermediate-level as frameworks for understanding a problem that may guide the development of specific interventions. Programme theories are specific to individual interventions and are concrete explanatory models rather than abstractions. Applying Davidoff and colleagues' formulation, our findings and model share characteristics of both programme theories and mid-range theories. There are few programme-level studies that have mid-range theoretical

1  
2  
3 implications. Often, research that attempts to create a "determinant framework" or a "mid-range  
4 theory" are relatively abstract and are removed from the original data. According to Nilsen, such  
5 theories have typically been analysed and formulated across individual studies, at the level of meta-  
6 analysis or review <sup>19</sup>. The present study is different in that we have developed mid-range theory that  
7 is empirically grounded in programme-level data, based on a corpus of projects; further, this work  
8 demonstrates a clear line from programme-level data to the generated theory.  
9

10  
11 In their conceptual model of healthcare innovation, Greenhalgh et al. emphasise diffusion as a  
12 measure of an innovation success. However, our findings indicate that successful innovations may  
13 have a natural boundary, perhaps because their aims have been achieved, or because the context  
14 changes. Our model therefore positions healthcare innovations along two axes of success: value  
15 creation on one axis ('did it work?'), and diffusion on the other ('did it embed/spread?'). The neutral  
16 mid-points of "value as expected" and "running as expected" allow us to conceptualise a valuable  
17 innovation that is not growing or expanding but has also not diminished in scale or been terminated.  
18 This, we argue, is important: healthcare innovations may often have strict parameters within which  
19 growth and expansion are constrained. An innovation that has met its aims but has not expanded  
20 beyond its natural boundary should be properly positioned as such.  
21  
22  
23  
24  
25  
26  
27  
28  
29  
30

## 31 32 Conclusions

33 We suggest that organisations and policy makers wishing to support service-level innovation in  
34 similar healthcare contexts are more likely to generate value if they address the factors identified  
35 through this research as critical to success.  
36  
37  
38

39 Such strategies include:

- 40  
41  
42 • supporting innovators with the right skills and expertise, including leadership,  
43 implementation and evaluation expertise
- 44  
45 • innovation networks to provide opportunities to showcase success and provide a community  
46 of learning and support
- 47  
48 • facilitation of participatory practices and collaborative approaches, so that innovations are  
49 more likely to align to societal and organisation goals, and generate value for patients,  
50 communities and practitioners
- 51  
52 • providing dedicated administrative and educational support so that innovators have  
53 sufficient time, expertise and energy for the roll-out phase
- 54  
55 • strategies that recognise and enhance the internal motivation and drive of innovators, such  
56 as providing protected time and support beyond the start-up phase.  
57  
58  
59  
60

1  
2  
3 At a structural level, the boundaries between organisations, professions, and the health and social  
4 care sectors need to be addressed as potential barriers to successful innovation.  
5

6  
7 More research is needed to confirm whether addressing these factors prospectively enhances the  
8 success of future innovations.  
9

## 10 11 Contributorship statement

12 KLG and GR contributed to the conception and design of the work and to the acquisition of data.

13  
14 KLG, GR and AK collaborated on the data analysis and interpretation. KLG and AK drafted the work,  
15 all authors revised it critically for important intellectual content. All authors have approved the final  
16 version and agree to be accountable for all aspects of the work and to resolve questions relating to  
17 accuracy or integrity.  
18  
19  
20  
21

## 22 23 Competing interests

24 There are no competing interests.  
25

## 26 27 Funding

28 This work was funded by Health Education England, grant number XXMLIVESEY.  
29

## 30 31 Data sharing statement

32 Due the highly individual nature of healthcare innovations and the limited geographic area of this  
33 study, we are unable to provide our raw data. We undertake to provide a redacted data set upon  
34 reasonable request.  
35  
36  
37

## 38 39 Supplementary data

40 Full text survey  
41

## 42 43 Acknowledgements

44 We would like to thank Josh Brewster from the Health Innovation Network and Sian Kitchen from  
45 Health Education England for their commitment to this project, and Prof Sue Smith from the Medical  
46 Education Research Unit of Imperial College for ongoing support and advice.  
47  
48  
49

## 50 51 Figure legends

### 52 53 **Figure 1: Research overview**

54 Legend: Understanding significant success factors and limiting factors in health service innovation: a mixed-  
55 methods research process involving an exploratory survey with explanatory nested comments and follow-up  
56 interviews.  
57

### 58 59 **Figure 2: Survey scope**

60

Legend: The survey scope was based on a systematic review of the literature (Lennox et al, 2018) supplemented by five scoping interviews. The full questions are listed in table 1, and the full text survey is in the supplementary material.

### Figure 3: Framework for categorisation of success within health service innovation

Legend: Health service innovations were categorised across two dimensions of success through an inductive classification process. The horizontal axis relates to how successful innovations were in realising their intended value: “did it work?” The vertical axis relates to the diffusion or extension of the innovation: “did it embed/spread?” Numbers in brackets indicate how many innovations were found in each category.

### Figure 4: Nested hierarchy of success factors and limiting factors for health service innovation

Legend: Factors that are significant to both value generation *and* to whether the innovation becomes embedded or spread are labelled as fundamental needs. Factors significant to value generation are the next priority (middle layer) as innovations that do not generate value will not become embedded or spread. Finally, factors that are only significant to whether an innovation becomes embedded or spread are presented in the innermost layer. Additional limiting factors were identified through an inductive analysis of qualitative responses.

## References

1. Chang AY, Cowling K, Micah AE, et al. Past, present, and future of global health financing: a review of development assistance, government, out-of-pocket, and other private spending on health for 195 countries, 1995–2050. *The Lancet* 2019;393(10187):2233-60. doi: 10.1016/S0140-6736(19)30841-4
2. Crisp N. What would a sustainable health and care system look like? *BMJ* 2017;358:j3895. doi: 10.1136/bmj.j3895
3. Nolte E. How do we ensure that innovation in health service delivery and organization is implemented, sustained and spread?: World Health Organization, 2018:p7.
4. Bornmann L, Haunschild R. Societal Impact Measurement of Research Papers. In: Glänzel W, Moed HF, Schmoch U, et al., eds. *Springer Handbook of Science and Technology Indicators*. Cham: Springer International Publishing 2019:609-32.
5. Pury EF, Davide N, Jean L, et al. NHS top managers, knowledge exchange and leadership: the early development of Academic Health Science Networks – a mixed-methods study. 2017 doi: <https://www.ncbi.nlm.nih.gov/books/NBK436464/>
6. McCulloch P, Altman DG, Campbell WB, et al. No surgical innovation without evaluation: the IDEAL recommendations. *The Lancet* 2009;374(9695):1105-12.
7. Bogna F, Raineri A, Dell G. Critical realism and constructivism: merging research paradigms for a deeper qualitative study. *Qualitative Research in Organizations and Management: An International Journal* 2020;15(4):461-84. doi: 10.1108/QROM-06-2019-1778
8. Creswell JW, Plano Clark VL, Gutmann ML, et al. Advanced mixed methods research designs. *Handbook of mixed methods in social and behavioral research* 2003;209:240.
9. Lennox L, Maher L, Reed J. Navigating the sustainability landscape: a systematic review of sustainability approaches in healthcare. *Implementation Science* 2018;13 doi: 10.1186/s13012-017-0707-4
10. Jebb AT, Parrigon S, Woo SE. Exploratory data analysis as a foundation of inductive research. *Human Resource Management Review* 2017;27(2):265-76. doi: <https://doi.org/10.1016/j.hrmr.2016.08.003>
11. Poots AJ, Reed JE, Woodcock T, et al. How to attribute causality in quality improvement: lessons from epidemiology. *BMJ Quality & Safety* 2017;26(11):933. doi: 10.1136/bmjqs-2017-006756

- 1
  - 2
  - 3
  - 4
  - 5
  - 6
  - 7
  - 8
  - 9
  - 10
  - 11
  - 12
  - 13
  - 14
  - 15
  - 16
  - 17
  - 18
  - 19
  - 20
  - 21
  - 22
  - 23
  - 24
  - 25
  - 26
  - 27
  - 28
  - 29
  - 30
  - 31
  - 32
  - 33
  - 34
  - 35
  - 36
  - 37
  - 38
  - 39
  - 40
  - 41
  - 42
  - 43
  - 44
  - 45
  - 46
  - 47
  - 48
  - 49
  - 50
  - 51
  - 52
  - 53
  - 54
  - 55
  - 56
  - 57
  - 58
  - 59
  - 60
12. The King's Fund. Key facts and figures about adult social care 2019 [Available from: <https://www.kingsfund.org.uk/audio-video/key-facts-figures-adult-social-care> accessed 12/12/2020].
13. Gadsby EW, Peckham S, Coleman A, et al. Commissioning for health improvement following the 2012 health and social care reforms in England: what has changed? *BMC public health* 2017;17(1):211-11. doi: 10.1186/s12889-017-4122-1
14. Greenhalgh T, Robert G, Macfarlane F, et al. Diffusion of innovations in service organizations: systematic review and recommendations. *Milbank Q* 2004;82(4):581-629. doi: 10.1111/j.0887-378X.2004.00325.x [published Online First: 2004/12/15]
15. Kitson AL, Rycroft-Malone J, Harvey G, et al. Evaluating the successful implementation of evidence into practice using the PARIHS framework: theoretical and practical challenges. *Implement Sci* 2008;3:1. doi: 10.1186/1748-5908-3-1 [published Online First: 2008/01/09]
16. Damschroder LJ, Aron DC, Keith RE, et al. Fostering implementation of health services research findings into practice: a consolidated framework for advancing implementation science. *Implement Sci* 2009;4:50. doi: 10.1186/1748-5908-4-50 [published Online First: 2009/08/12]
17. Aarons GA, Hurlburt M, Horwitz SM. Advancing a conceptual model of evidence-based practice implementation in public service sectors. *Administration and policy in mental health* 2011;38(1):4-23. doi: 10.1007/s10488-010-0327-7 [published Online First: 2011/01/05]
18. Nolte E. How do we ensure that innovation in health service delivery and organization is implemented, sustained and spread? *World Health Organization* 2018
19. Nilsen P. Making sense of implementation theories, models and frameworks. *Implement Sci* 2015;10:53. doi: 10.1186/s13012-015-0242-0 [published Online First: 2015/04/22]
20. Davidoff F, Dixon-Woods M, Leviton L, et al. Demystifying theory and its use in improvement. *BMJ Qual Saf* 2015;24(3):228-38. doi: 10.1136/bmjqs-2014-003627 [published Online First: 2015/01/27]

**Table 1: Analysis of variance of potential success factors across categories of success**

|    | Factor                                                                                                                                      | Average answer across all categories* | Distribution of factor is the same across categories of expansion (proven value) | Distribution of factor is the same across categories of expansion (all) | Distribution of factor is the same across categories of realised value | Interpretation and comment on secondary analysis***                                  |
|----|---------------------------------------------------------------------------------------------------------------------------------------------|---------------------------------------|----------------------------------------------------------------------------------|-------------------------------------------------------------------------|------------------------------------------------------------------------|--------------------------------------------------------------------------------------|
|    |                                                                                                                                             |                                       | Sig.**                                                                           | Sig.**                                                                  | Sig.**                                                                 |                                                                                      |
| 1  | The initiative was designed to end once a set outcome had been achieved                                                                     | ↘ -0.40                               | 0.274                                                                            | 0.172                                                                   | 0.317                                                                  |                                                                                      |
| 2  | The initiative was designed to end after defined period of time                                                                             | ↘ -0.58                               | 0.011                                                                            | 0.011                                                                   | 0.288                                                                  | Unsurprisingly, even projects with high realised value finish if they are time-bound |
| 3  | The initiative was designed to address an important healthcare need                                                                         | ↑ 1.63                                | 0.765                                                                            | 0.712                                                                   | 0.135                                                                  |                                                                                      |
| 4  | There was public/political recognition and concern for the problem that the initiative was designed to address                              | ↑ 1.23                                | 0.939                                                                            | 0.66                                                                    | 0.201                                                                  |                                                                                      |
| 5  | The initiative was based on a strong evidence base, and it was credible that the stated benefits could be achieved through the project plan | ↑ 1.35                                | 0.696                                                                            | 0.355                                                                   | 0.299                                                                  |                                                                                      |
| 6  | The project was sufficiently funded                                                                                                         | ↗ 1.17                                | 0.941                                                                            | 0.454                                                                   | 0.126                                                                  |                                                                                      |
| 7  | The project had sufficient infrastructure, such as buildings, office space, materials or supplies                                           | ↑ 1.52                                | 0.952                                                                            | 0.842                                                                   | 0.613                                                                  |                                                                                      |
| 8  | There were sufficient members of staff with the right skills to meet the requirements of the initiative                                     | ↑ 1.42                                | 0.003                                                                            | 0.002                                                                   | 0.013                                                                  | Skilled workforce is a critical success factor across all definitions of success     |
| 9  | Members of staff had sufficient energy and time to dedicate to the initiative                                                               | ↑ 1.21                                | 0.033                                                                            | 0.085                                                                   | 0.362                                                                  | Time and energy are critical to whether proven innovations expand                    |
| 10 | There was sufficient administrative support to deliver and maintain the initiative                                                          | ↗ 0.85                                | 0.013                                                                            | 0.019                                                                   | 0.142                                                                  | Administrative support is critical to whether an innovation expands                  |
| 11 | There was sufficient technical support to deliver and maintain the initiative                                                               | ↗ 1.04                                | 0.113                                                                            | 0.187                                                                   | 0.657                                                                  |                                                                                      |

|    | Factor                                                                                                                                  | Average answer across all categories* | Distribution of factor is the same across categories of expansion (proven value) | Distribution of factor is the same across categories of expansion (all) | Distribution of factor is the same across categories of realised value | Interpretation and comment on secondary analysis***                                                                                                    |
|----|-----------------------------------------------------------------------------------------------------------------------------------------|---------------------------------------|----------------------------------------------------------------------------------|-------------------------------------------------------------------------|------------------------------------------------------------------------|--------------------------------------------------------------------------------------------------------------------------------------------------------|
|    |                                                                                                                                         |                                       | Sig.**                                                                           | Sig.**                                                                  | Sig.**                                                                 |                                                                                                                                                        |
| 12 | There was sufficient educational support to deliver and maintain the initiative                                                         | ↑ 1.30                                | 0.023                                                                            | 0.012                                                                   | 0.089                                                                  | Educational support is critical to whether an innovation expands                                                                                       |
| 13 | External political or societal factors impacted negatively on the delivery of the initiative                                            | ↘ -0.91                               | 0.191                                                                            | 0.141                                                                   | 0.005                                                                  | External political or societal factors appear critical to whether an innovation is able to realise its intended value (inconsistent exposure/response) |
| 14 | It was necessary to adapt the project so that it aligned more closely with external political or societal priorities                    | ↘ -0.72                               | 0.541                                                                            | 0.252                                                                   | 0.064                                                                  |                                                                                                                                                        |
| 15 | We had opportunities to demonstrate the benefits of this innovation within our organisation and/or to other organisations               | ↑ 1.59                                | 0.237                                                                            | 0.053                                                                   | 0.02                                                                   | Unsurprisingly innovations that were able to realise their intended value, were more likely to be able to demonstrate the benefits of their innovation |
| 16 | Steps were taken to raise the profile of the initiative e.g. through media, marketing, community engagement or publications             | ↗ 0.85                                | 0.108                                                                            | 0.059                                                                   | 0.306                                                                  |                                                                                                                                                        |
| 17 | There are plans to replicate this innovation at other sites or spread it to other parts of the organisation                             | ↗ 0.58                                | 0.024                                                                            | 0.012                                                                   | 0.228                                                                  | Unsurprisingly, innovations that have become embedded and spread were more likely to say there were plans to spread their innovation                   |
| 18 | The initiative integrated well into existing organisational structures, programmes or policies                                          | ↑ 1.26                                | 0.012                                                                            | 0.002                                                                   | 0.059                                                                  | The ability of an innovation to integrate into existing organisational structures is critical to whether it becomes embedded or spread                 |
| 19 | It was necessary to adapt the initiative so that it achieved a good fit with existing organisational structures, programmes or policies | → -0.09                               | 0.053                                                                            | 0.035                                                                   | 0.115                                                                  | For innovations to extend/embed, including those that are less successful, they must adapt so that they fit within existing organisational structures. |
| 20 | The host organisation was ready and able to undertake the initiative                                                                    | ↑ 1.55                                | 0.262                                                                            | 0.168                                                                   | 0.721                                                                  |                                                                                                                                                        |



|    | Factor                                                                                          | Average answer across all categories* | Distribution of factor is the same across categories of expansion (proven value) | Distribution of factor is the same across categories of expansion (all) | Distribution of factor is the same across categories of realised value | Interpretation and comment on secondary analysis***                                                                       |
|----|-------------------------------------------------------------------------------------------------|---------------------------------------|----------------------------------------------------------------------------------|-------------------------------------------------------------------------|------------------------------------------------------------------------|---------------------------------------------------------------------------------------------------------------------------|
|    |                                                                                                 |                                       | Sig.**                                                                           | Sig.**                                                                  | Sig.**                                                                 |                                                                                                                           |
| 21 | The initiative was hampered by opposition from within the host organisation                     | ↓ -1.50                               | 0.037                                                                            | 0.027                                                                   | 0.398                                                                  | However valuable an innovation is, it will not survive if it is opposed within the host organisation.                     |
| 22 | The host organisation lacked the necessary values/culture to support and sustain the initiative | ↓ -1.17                               | 0.265                                                                            | 0.247                                                                   | 0.888                                                                  |                                                                                                                           |
| 23 | I was released from other duties so that I could implement this initiative                      | ↘ -0.43                               | 0.732                                                                            | 0.893                                                                   | 0.789                                                                  |                                                                                                                           |
| 24 | I had a supportive peer network that I could discuss any issues or problems with                | ↑ 1.32                                | 0.385                                                                            | 0.562                                                                   | 0.79                                                                   |                                                                                                                           |
| 25 | I was internally motivated to implement this initiative                                         | ↑ 1.81                                | 0.425                                                                            | 0.129                                                                   | 0.034                                                                  | Innovations are more likely to realise their value if the innovator is internally motivated                               |
| 26 | I found working on the initiative personally rewarding                                          | ↑ 1.81                                | 0.147                                                                            | 0.067                                                                   | 0.022                                                                  | Unsurprisingly, there is a correlation between an innovation realising its value, and the innovator finding it rewarding. |
| 27 | I feel I had the right skills/experience/training to implement and sustain the initiative       | ↑ 1.62                                | 0.033                                                                            | 0.008                                                                   | 0.023                                                                  | The skills of the innovator are a critical success factor across all definitions of success.                              |
| 28 | I had sufficient energy and time to dedicate to the initiative                                  | ↗ 1.06                                | 0.209                                                                            | 0.268                                                                   | 0.498                                                                  |                                                                                                                           |
| 29 | The project had sufficient input from experts with the necessary knowledge and experience       | ↑ 1.66                                | 0.134                                                                            | 0.018                                                                   | 0.021                                                                  | Expert input is critical to both realisation of value, and to whether it expands.                                         |
| 30 | The outcomes and impact of the project were measured or assessed                                | ↑ 1.37                                | 0.060                                                                            | 0.125                                                                   | 0.119                                                                  |                                                                                                                           |



|    | Factor                                                                                           | Average answer across all categories* | Distribution of factor is the same across categories of expansion (proven value) | Distribution of factor is the same across categories of expansion (all) | Distribution of factor is the same across categories of realised value | Interpretation and comment on secondary analysis***                                                                                                          |
|----|--------------------------------------------------------------------------------------------------|---------------------------------------|----------------------------------------------------------------------------------|-------------------------------------------------------------------------|------------------------------------------------------------------------|--------------------------------------------------------------------------------------------------------------------------------------------------------------|
|    |                                                                                                  |                                       | Sig.**                                                                           | Sig.**                                                                  | Sig.**                                                                 |                                                                                                                                                              |
| 31 | We were able to demonstrate the effectiveness of the project                                     | ↑ 1.38                                | 0.463                                                                            | 0.185                                                                   | 0.015                                                                  | Unsurprisingly innovations that were able to realise their intended value, were more likely to be able to demonstrate the effectiveness of their innovation. |
| 32 | Performance data was gathered and reported on a regular basis                                    | ↗ 1.04                                | 0.346                                                                            | 0.266                                                                   | 0.159                                                                  |                                                                                                                                                              |
| 33 | Steps were taken to systematically improve and adapt the project                                 | ↑ 1.44                                | 0.293                                                                            | 0.153                                                                   | 0.377                                                                  |                                                                                                                                                              |
| 34 | There was ongoing orientation and training available e.g. to new staff or to build capacity      | ↗ 0.87                                | 0.034                                                                            | 0.03                                                                    | 0.153                                                                  | The availability of ongoing training is critical to whether successful innovations become embedded or spread.                                                |
| 35 | Staff were given time/incentives to attend the necessary training                                | → 0.47                                | 0.096                                                                            | 0.159                                                                   | 0.178                                                                  |                                                                                                                                                              |
| 36 | Staff were required to attend the necessary training                                             | → 0.11                                | 0.348                                                                            | 0.271                                                                   | 0.767                                                                  |                                                                                                                                                              |
| 37 | The initiative was difficult or complex to deliver                                               | → -0.09                               | 0.294                                                                            | 0.163                                                                   | 0.158                                                                  |                                                                                                                                                              |
| 38 | The initiative helped to make things easier or more efficient                                    | ↗ 0.76                                | 0.86                                                                             | 0.953                                                                   | 0.182                                                                  |                                                                                                                                                              |
| 39 | The initiative did not require special or extra effort                                           | ↓ -1.09                               | 0.979                                                                            | 0.869                                                                   | 0.597                                                                  |                                                                                                                                                              |
| 40 | I believe that the staff delivering the initiative found the work/tasks rewarding and satisfying | ↑ 1.59                                | 0.368                                                                            | 0.456                                                                   | 0.743                                                                  |                                                                                                                                                              |
| 41 | The project team worked well together                                                            | ↑ 1.74                                | 0.416                                                                            | 0.796                                                                   | 0.893                                                                  |                                                                                                                                                              |
| 42 | There were clear responsibilities for individuals the work was shared across the team            | ↑ 1.45                                | 0.945                                                                            | 0.533                                                                   | 0.066                                                                  |                                                                                                                                                              |
| 43 | Project was overly dependent on a particular individual or individuals                           | ↗ 0.57                                | 0.708                                                                            | 0.355                                                                   | 0.29                                                                   |                                                                                                                                                              |

|    | Factor                                                                                                                              | Average answer across all categories* | Distribution of factor is the same across categories of expansion (proven value) | Distribution of factor is the same across categories of expansion (all) | Distribution of factor is the same across categories of realised value | Interpretation and comment on secondary analysis***                                                                                                                      |
|----|-------------------------------------------------------------------------------------------------------------------------------------|---------------------------------------|----------------------------------------------------------------------------------|-------------------------------------------------------------------------|------------------------------------------------------------------------|--------------------------------------------------------------------------------------------------------------------------------------------------------------------------|
|    |                                                                                                                                     |                                       | Sig.**                                                                           | Sig.**                                                                  | Sig.**                                                                 |                                                                                                                                                                          |
| 44 | I believe that the team understood what the project was trying to achieve and that it would lead to improved processes and outcomes | ↑ 1.62                                | 0.218                                                                            | 0.165                                                                   | 0.772                                                                  |                                                                                                                                                                          |
| 45 | There were rewards or incentives that supported engagement with, and continued delivery of, the initiative                          | → 0.07                                | 0.45                                                                             | 0.638                                                                   | 0.228                                                                  |                                                                                                                                                                          |
| 46 | The activities and roles of the initiative were incorporated into job descriptions                                                  | ↓ -0.30                               | 0.29                                                                             | 0.243                                                                   | 0.141                                                                  |                                                                                                                                                                          |
| 47 | Staff had time within their working hours to complete the tasks of the initiative                                                   | ↗ 0.59                                | 0.251                                                                            | 0.138                                                                   | 0.328                                                                  |                                                                                                                                                                          |
| 48 | The initiative had leadership and/or champions who were committed and capable                                                       | ↑ 1.62                                | 0.003                                                                            | 0.001                                                                   | 0.006                                                                  | Leadership is a highly significant critical success factor across all definitions of success.                                                                            |
| 49 | There was an appropriate balance of power between those involved with the initiative                                                | ↗ 1.15                                | 0.697                                                                            | 0.775                                                                   | 0.929                                                                  |                                                                                                                                                                          |
| 50 | Team members were able to express their opinions, and their opinions were valued                                                    | ↑ 1.91                                | 1 (no valriance)                                                                 | 0.049                                                                   | 0.026                                                                  | Distributed decision making was a critical success factor across all definitions of success, and common to all embedded/ spread innovations of value (hence no variance) |
| 51 | There was a sense of ownership and commitment by those involved with the initiative                                                 | ↑ 1.79                                | 0.284                                                                            | 0.177                                                                   | 0.102                                                                  |                                                                                                                                                                          |
| 52 | Staff who were responsible for delivering the initiative were involved as partners, and were able to shape the initiative           | ↑ 1.74                                | 0.306                                                                            | 0.176                                                                   | 0.031                                                                  | Participatory processes with staff were critical to the ability of a project to realise its intended value.                                                              |

|    | Factor                                                                                                                  | Average answer across all categories* | Distribution of factor is the same across categories of expansion (proven value) | Distribution of factor is the same across categories of expansion (all) | Distribution of factor is the same across categories of realised value | Interpretation and comment on secondary analysis***                                                                                                            |
|----|-------------------------------------------------------------------------------------------------------------------------|---------------------------------------|----------------------------------------------------------------------------------|-------------------------------------------------------------------------|------------------------------------------------------------------------|----------------------------------------------------------------------------------------------------------------------------------------------------------------|
|    |                                                                                                                         |                                       | Sig.**                                                                           | Sig.**                                                                  | Sig.**                                                                 |                                                                                                                                                                |
| 53 | The beneficiaries (patients/service users) were involved as partners, and were able to shape the initiative             | ↗ 0.83                                | 0.45                                                                             | 0.139                                                                   | 0.027                                                                  | Participatory processes with patients/service users were critical to the ability of a project to realise its intended value.                                   |
| 54 | The community in which it was situated were involved as partners, and were able to shape the initiative                 | ↗ 0.96                                | 0.177                                                                            | 0.034                                                                   | 0.023                                                                  | Participatory processes on a community level were critical to both the ability of a project to realise its value, and its ability to become embedded / spread. |
| 55 | There was a collaborative network of people/organisations that helped to support and sustain the initiative             | ↑ 1.30                                | 0.008                                                                            | 0.007                                                                   | 0.003                                                                  | The support of a collaborative network of people/organisation is a highly significant critical success factor across all definitions of success.               |
| 56 | It felt as though the initiative was imposed on us and there was little sense of ownership or commitment to the project | ↓ -1.64                               | 0.684                                                                            | 0.488                                                                   | 0.326                                                                  |                                                                                                                                                                |

Foot note to table 1: Analysis of variance of potential success factors across categories of success

\* Respondents on average ↑= agree, ↗=somewhat agree, →=neither agree not disagree, ↘= somewhat disagree, ↓=disagree

\*\* Asymptotic significances are displayed. The significance level is 0.05.

The darker the shading, the safer it is to reject the null hypothesis. Sig <0.05 indicates >95% certainty that the difference between categories is not random.

\*\*\* Secondary analysis examined the direction of the association and the strength of effect across categories of success.

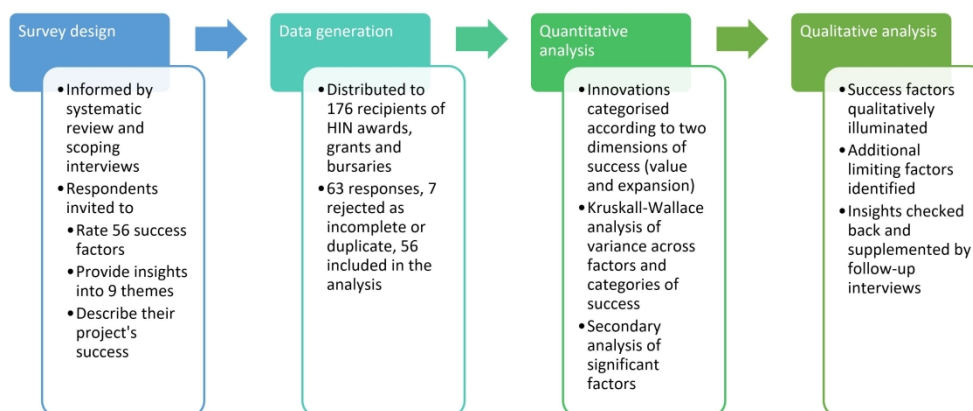

Figure 1: Research overview / Understanding significant success factors and limiting factors in health service innovation: a mixed-methods research process involving an exploratory survey with explanatory nested comments and follow-up interviews.

580x240mm (144 x 144 DPI)

|                                                                                                                                                                                                                       |                                                                                                                                                                                                                                                                                                                                                                               |                                                                                                                                                                                                                                                                                                                  |
|-----------------------------------------------------------------------------------------------------------------------------------------------------------------------------------------------------------------------|-------------------------------------------------------------------------------------------------------------------------------------------------------------------------------------------------------------------------------------------------------------------------------------------------------------------------------------------------------------------------------|------------------------------------------------------------------------------------------------------------------------------------------------------------------------------------------------------------------------------------------------------------------------------------------------------------------|
| <b>Project aims</b>                                                                                                                                                                                                   | <b>Resources &amp; support</b>                                                                                                                                                                                                                                                                                                                                                | <b>External factors</b>                                                                                                                                                                                                                                                                                          |
| <ul style="list-style-type: none"> <li>• Important healthcare need</li> <li>• Public/political recognition and concern for the need</li> <li>• Strong evidence-based</li> </ul>                                       | <ul style="list-style-type: none"> <li>• Funding</li> <li>• Infrastructure</li> <li>• Staff with right skills</li> <li>• Staff time &amp; energy</li> <li>• Administrative support</li> <li>• Technical support</li> <li>• Educational support</li> </ul>                                                                                                                     | <ul style="list-style-type: none"> <li>• Evolving external political or societal factors</li> <li>• Adaptation to external political or societal priorities</li> <li>• Opportunities to share impacts externally</li> <li>• Profile raising activities</li> <li>• Plans to replicate</li> </ul>                  |
| <b>Organisational factors</b>                                                                                                                                                                                         | <b>Personal factors</b>                                                                                                                                                                                                                                                                                                                                                       | <b>Implementation</b>                                                                                                                                                                                                                                                                                            |
| <ul style="list-style-type: none"> <li>• Organisational fit</li> <li>• Adaptation to organisation</li> <li>• Receptive organisation</li> <li>• Organisational opposition</li> <li>• Organisational culture</li> </ul> | <ul style="list-style-type: none"> <li>• Dedicated time</li> <li>• Supportive peer network</li> <li>• Internal motivation</li> <li>• Personally rewarding</li> <li>• Personal skills set</li> <li>• Personal time &amp; energy</li> </ul>                                                                                                                                     | <ul style="list-style-type: none"> <li>• Expert input</li> <li>• Outcomes measured</li> <li>• Ability to demonstrate success</li> <li>• Performance data</li> <li>• Improvement strategies</li> <li>• Availability of training</li> <li>• Incentives for training</li> <li>• Requirement for training</li> </ul> |
| <b>The tasks of the project</b>                                                                                                                                                                                       | <b>Team factors</b>                                                                                                                                                                                                                                                                                                                                                           | <b>Participation</b>                                                                                                                                                                                                                                                                                             |
| <ul style="list-style-type: none"> <li>• Complexity</li> <li>• Made things easier</li> <li>• No extra effort</li> <li>• Work/tasks rewarding</li> </ul>                                                               | <ul style="list-style-type: none"> <li>• Team harmony</li> <li>• Clear responsibilities</li> <li>• Shared responsibility</li> <li>• Team belief in project aims</li> <li>• Engagement rewarded</li> <li>• Job descriptions</li> <li>• Time allocation</li> <li>• Team leadership</li> <li>• Balance of power</li> <li>• Team involvement</li> <li>• Team ownership</li> </ul> | <ul style="list-style-type: none"> <li>• Staff participation</li> <li>• Service-user participation</li> <li>• Community participation</li> <li>• Collaborative support network</li> <li>• Externally mandated</li> </ul>                                                                                         |

Figure 2: Survey scope / The survey scope was based on a systematic review of the literature (Lennox et al, 2018) supplemented by five scoping interviews. The questions are listed in table 1, and the full text survey is in the supplementary material.

332x329mm (144 x 144 DPI)

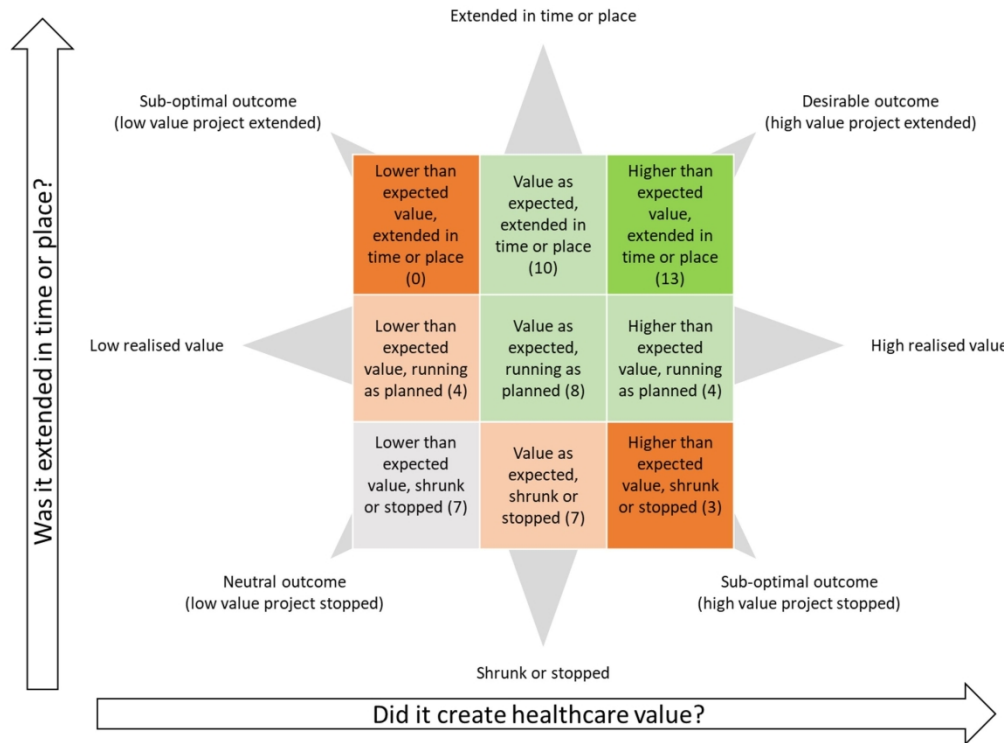

Figure 3: Framework for categorisation of success within health service innovation / Health service innovations were categorised across two dimensions of success through an inductive classification process. The horizontal axis relates to how successful innovations were in realising their intended value: "did it work?" The vertical axis relates to the diffusion or extension of the innovation: "did it embed/spread?" Numbers in brackets indicate how many innovations were found in each category.

445x331mm (144 x 144 DPI)

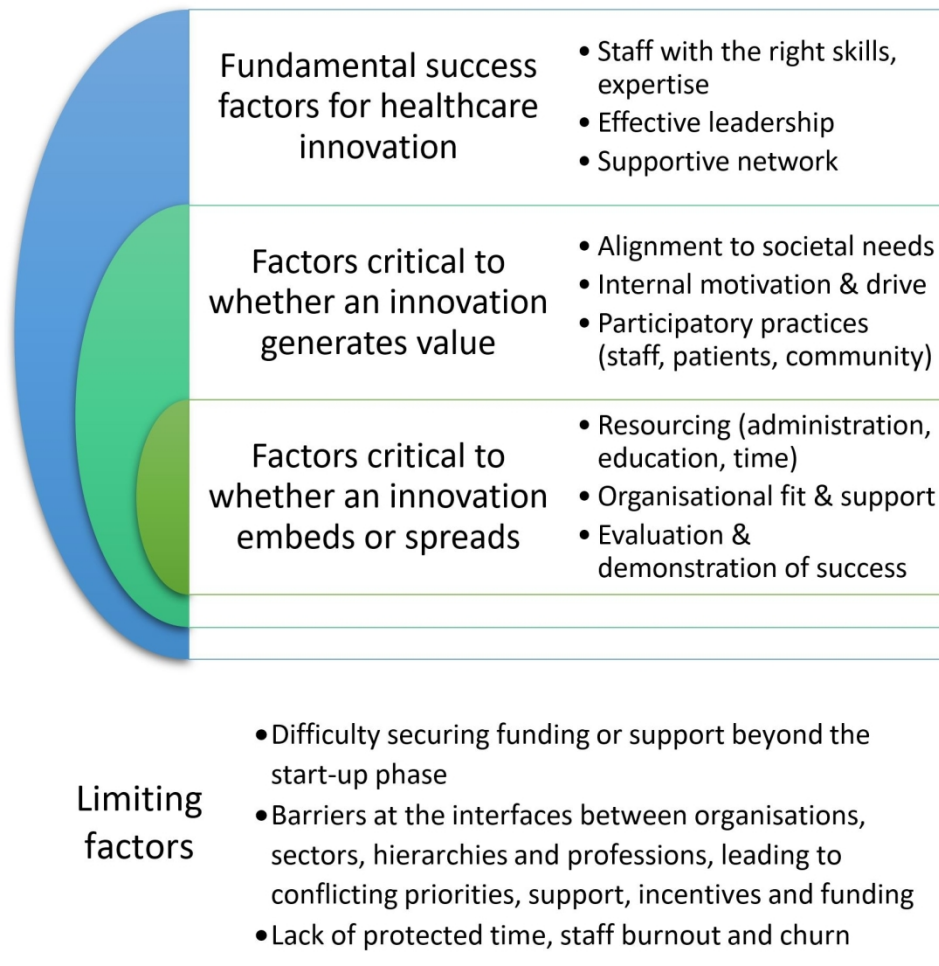

Figure 4: Nested hierarchy of success factors and limiting factors for health service innovation / Factors that are significant to both value generation and to whether the innovation becomes embedded or spread are labelled as fundamental needs. Factors significant to value generation are the next priority (middle layer) as innovations that do not generate value will not become embedded or spread. Finally, factors that are only significant to whether an innovation becomes embedded or spread are presented in the innermost layer. Additional limiting factors were identified through an inductive analysis of qualitative responses.

332x337mm (144 x 144 DPI)

# Sustaining and embedding healthcare innovations - HIN evaluation - post scoping

---

## Start of Block: Opening block

Q1

### **Sustaining and embedding healthcare innovations: an evaluation for the Health Innovation Network and Health Education England**

This questionnaire is being conducted by King's College London on behalf of Health Education England and the Health Innovation Network (HIN). The questionnaire aims to explore factors influencing the long term success of healthcare innovations. You will be asked to rate a set of factors that have been identified from the current literature and evidence.

Each rating should represent your overall impression of whether the factor has influenced the project named below. Please use the free text boxes to help us understand any factors that you feel are particularly important.

#### **How will my responses be used?**

HIN would like to support healthcare innovators so that their projects are more likely to become sustained and embedded. Aggregated responses will be used by HIN to target training and development, and to disseminate learning about factors that impact on the sustainability of healthcare innovations. You will not be identified as a respondent.

#### **Why have I been approached?**

You are the named recipient of `#{e://Field/Award}` from the Health Innovation Network of South London. This project has been approved by King's College Research Ethics Committee Ref: LRS-18/19-10432.

#### **Which project does this survey relate to?**

`#{e://Field/ProjectTitle}`

---



1  
2  
3 Q3 Please tell us about the above named project (select one)  
4  
5

- 6  It is no longer running (you can tell us why later) (1)  
7  
8  It is running, but likely to finish soon (2)  
9  
10  It is running in a stable way but has NOT been adopted beyond its original pilot (3)  
11  
12  It is running in a stable way and HAS been adopted beyond its original pilot (4)  
13  
14  It is too early to have a view on its long term status (5)  
15  
16  Other (7) \_\_\_\_\_  
17  
18  
19  
20
- 

21  
22  
23 Q4 Tell us about yourself (tick ALL that apply)  
24  
25

- 26  I am part of the project leadership team (1)  
27  
28  I am part of the project administrative team (2)  
29  
30  I am part of the project training team (3)  
31  
32  I am a healthcare/socialcare professional delivering this project to  
33 patients/service users (4)  
34  
35  I am a patient/service user (5)  
36  
37  Other (please describe) (6)  
38  
39  
40  
41  
42  
43  
44  
45
- 

46 End of Block: Opening block

47  
48 Start of Block: The Project  
49  
50

51 **Q18 Factors relating to the type of project, and what it was trying to achieve.**  
52

53 Please use the free text box at the bottom to help us understand any factors that you feel are  
54 particularly important.  
55  
56  
57  
58  
59  
60

1  
2  
3  
4  
5 Q66 The initiative was designed to end once a set outcome had been achieved.  
6  
7

- 8  Agree (1)  
9  
10  Somewhat agree (2)  
11  
12  Neither agree nor disagree (3)  
13  
14  Somewhat disagree (4)  
15  
16  Disagree (5)  
17  
18  Don't know (6)  
19  
20  
21  
22  
23  
24  
25

26  
27  
28 Q67 The initiative was designed to end after defined period of time.  
29  
30

- 31  Agree (1)  
32  
33  Somewhat agree (2)  
34  
35  Neither agree nor disagree (3)  
36  
37  Somewhat disagree (4)  
38  
39  Disagree (5)  
40  
41  Don't know (6)  
42  
43  
44  
45  
46  
47  
48  
49  
50  
51  
52  
53  
54  
55  
56  
57  
58  
59  
60

1  
2  
3 Q68 The initiative was designed to address an important healthcare need.  
4  
5

- 6  Agree (1)  
7  
8  Somewhat agree (2)  
9  
10  
11  Neither agree nor disagree (3)  
12  
13  
14  Somewhat disagree (4)  
15  
16  
17  Disagree (5)  
18  
19  
20  Don't know (6)  
21  
22
- 

23  
24  
25  
26 Q69 There was public/political recognition and concern for the problem that the initiative was  
27 designed to address.  
28

- 29  Agree (1)  
30  
31  
32  Somewhat agree (2)  
33  
34  
35  
36  Neither agree nor disagree (3)  
37  
38  
39  Somewhat disagree (4)  
40  
41  
42  Disagree (5)  
43  
44  
45  Don't know (6)  
46  
47
-

1  
2  
3 Q72 The initiative was based on a strong evidence base, and it was credible that the stated  
4 benefits could be achieved through the project plan.  
5

- 6  
7  Agree (1)  
8  
9  Somewhat agree (2)  
10  
11  Neither agree nor disagree (3)  
12  
13  Somewhat disagree (4)  
14  
15  Disagree (5)  
16  
17  Don't know (6)  
18  
19  
20  
21  
22  
23
- 

24  
25  
26  
27 Q79 Insights or details relating to the type of project or what it was trying to achieve, and how  
28 this has impacted on whether the initiative has become sustained and embedded:  
29

30  
31 \_\_\_\_\_  
32  
33 \_\_\_\_\_  
34  
35 \_\_\_\_\_  
36  
37 \_\_\_\_\_  
38  
39 \_\_\_\_\_  
40

41 **End of Block: The Project**

42  
43 **Start of Block: Resources**

44  
45  
46 **Q26 Factors relating to how well the project was resourced.**

47 Please use the free text box at the bottom to help us understand any factors that you feel are  
48 particularly important.  
49  
50  
51

---

1  
2  
3 Q65 The project was sufficiently funded.  
4

- 5  Agree (1)  
6  
7  
8  Somewhat agree (2)  
9  
10  
11  Neither agree nor disagree (3)  
12  
13  
14  Somewhat disagree (4)  
15  
16  
17  Disagree (5)  
18  
19  
20  Don't know (6)  
21  
22
- 

23  
24  
25  
26 Q36 The project had sufficient infrastructure, such as buildings, office space, materials or  
27 supplies.  
28

- 29  Agree (1)  
30  
31  
32  Somewhat agree (2)  
33  
34  
35  Neither agree nor disagree (3)  
36  
37  
38  Somewhat disagree (4)  
39  
40  
41  Disagree (5)  
42  
43  
44  Don't know (6)  
45  
46  
47
-

1  
2  
3 Q37 There were sufficient members of staff with the right skills to meet the requirements of the  
4 initiative.  
5

- 6  Agree (1)  
7  
8  Somewhat agree (2)  
9  
10  
11  Neither agree nor disagree (3)  
12  
13  
14  Somewhat disagree (4)  
15  
16  
17  Disagree (5)  
18  
19  
20  Don't know (6)  
21  
22  
23
- 

24  
25  
26  
27 Q38 Members of staff had sufficient energy and time to dedicate to the initiative.  
28

- 29  Agree (1)  
30  
31  Somewhat agree (2)  
32  
33  
34  Neither agree nor disagree (3)  
35  
36  
37  Somewhat disagree (4)  
38  
39  
40  Disagree (5)  
41  
42  
43  Don't know (6)  
44  
45  
46  
47
-

1  
2  
3 Q35 There was sufficient administrative support to deliver and maintain the initiative.  
4  
5

- 6  Agree (1)  
7  
8  Somewhat agree (2)  
9  
10  
11  Neither agree nor disagree (3)  
12  
13  
14  Somewhat disagree (4)  
15  
16  
17  Disagree (5)  
18  
19  
20  Don't know (6)  
21  
22
- 

23  
24  
25  
26 Q39 There was sufficient technical support to deliver and maintain the initiative.  
27

- 28  Agree (1)  
29  
30  
31  Somewhat agree (2)  
32  
33  
34  Neither agree nor disagree (3)  
35  
36  
37  Somewhat disagree (4)  
38  
39  
40  Disagree (5)  
41  
42  
43  Don't know (6)  
44  
45
-

1  
2  
3 Q40 There was sufficient educational support to deliver and maintain the initiative.  
4  
5

- 6  Agree (1)  
7  
8  Somewhat agree (2)  
9  
10  
11  Neither agree nor disagree (3)  
12  
13  
14  Somewhat disagree (4)  
15  
16  
17  Disagree (5)  
18  
19  
20  Don't know (6)  
21  
22

23  
24  
25  
26 Q87 Insights or details relating to how well the project was resourced, and how this has  
27 impacted on whether the initiative has become sustained and embedded:  
28

29  
30  
31  
32  
33  
34  
35  
36  
37  
38

39  
40 **End of Block: Resources**  
41

42 **Start of Block: External environment**  
43  
44

45 **Q47 Factors relating to how the project intersected with the external environment.**

46 Please use the free text box at the bottom to help us understand any factors that you feel are  
47 particularly important.  
48  
49



1  
2  
3 Q41 External political or societal factors impacted negatively on the delivery of the initiative.  
4  
5

- 6  Agree (1)  
7  
8  Somewhat agree (2)  
9  
10  
11  Neither agree nor disagree (3)  
12  
13  
14  Somewhat disagree (4)  
15  
16  
17  Disagree (5)  
18  
19  
20  Don't know (6)  
21  
22
- 

23  
24  
25  
26 Q42 It was necessary to adapt the project so that it aligned more closely with external political  
27 or societal priorities.  
28

- 29  
30  Agree (1)  
31  
32  Somewhat agree (2)  
33  
34  
35  Neither agree nor disagree (3)  
36  
37  
38  Somewhat disagree (4)  
39  
40  
41  Disagree (5)  
42  
43  
44  Don't know (6)  
45  
46  
47
-

1  
2  
3 Q43 We had opportunities to demonstrate the benefits of this innovation within our organisation  
4 and/or to other organisations.  
5

- 6  Agree (1)  
7  
8  Somewhat agree (2)  
9  
10  
11  
12  Neither agree nor disagree (3)  
13  
14  
15  Somewhat disagree (4)  
16  
17  
18  Disagree (5)  
19  
20  
21  Don't know (6)  
22  
23
- 

24  
25  
26  
27 Q44 Steps were taken to raise the profile of the initiative e.g. through media, marketing,  
28 community engagement or publications.  
29

- 30  
31  Agree (1)  
32  
33  Somewhat agree (2)  
34  
35  
36  
37  Neither agree nor disagree (3)  
38  
39  
40  Somewhat disagree (4)  
41  
42  
43  Disagree (5)  
44  
45  
46  Don't know (6)  
47  
48
-

1  
2  
3 Q45 There are plans to replicate this innovation at other sites or spread it to other parts of the  
4 organisation.  
5

- 6  
7  Agree (1)  
8  
9  Somewhat agree (2)  
10  
11  Neither agree nor disagree (3)  
12  
13  Somewhat disagree (4)  
14  
15  Disagree (5)  
16  
17  Don't know (6)  
18  
19  
20  
21  
22  
23
- 

24  
25  
26  
27 Q92 Insights or details relating to how the project intersected with the external environment, and  
28 how this has impacted on whether the initiative has become sustained and embedded:  
29  
30

31 \_\_\_\_\_  
32 \_\_\_\_\_  
33 \_\_\_\_\_  
34 \_\_\_\_\_  
35 \_\_\_\_\_  
36 \_\_\_\_\_  
37 \_\_\_\_\_  
38 \_\_\_\_\_  
39 \_\_\_\_\_  
40

41 **End of Block: External environment**

---

42  
43 **Start of Block: The organisation**

44  
45  
46 **Q49 Factors relating to the host organisation within which this initiative was situated.**

47 Your comments will not be fed directly back to the host organisation, however they may be used  
48 to identify a training need. Please use the free text box at the bottom to help us understand any  
49 factors that you feel are particularly important.  
50  
51

52  
53  
54 We believe the host organisation for this innovation to be:

55 **`#{e://Field/Organisation}`**  
56  
57  
58

1  
2  
3  
4 If you are referring to another organisation (e.g. CCG, Hospital Trust) please name it here:  
5  
6  
7 \_\_\_\_\_  
8  
9 \_\_\_\_\_

10  
11 Q48 The initiative integrated well into existing organisational structures, programmes or policies.  
12

- 13  
14  Agree (1)  
15  
16  Somewhat agree (2)  
17  
18  Neither agree nor disagree (3)  
19  
20  Somewhat disagree (4)  
21  
22  Disagree (5)  
23  
24  Don't know (6)  
25  
26  
27  
28  
29  
30  
31

32  
33  
34 Q50 It was necessary to adapt the initiative so that it achieved a good fit with existing  
35 organisational structures, programmes or policies.  
36

- 37  
38  Agree (1)  
39  
40  Somewhat agree (2)  
41  
42  Neither agree nor disagree (3)  
43  
44  Somewhat disagree (4)  
45  
46  Disagree (5)  
47  
48  Don't know (6)  
49  
50  
51  
52  
53  
54  
55  
56  
57  
58  
59  
60

1  
2  
3  
4 Q51 The host organisation was ready and able to undertake the initiative.  
5  
6

- 7  Agree (1)  
8  
9  Somewhat agree (2)  
10  
11  Neither agree nor disagree (3)  
12  
13  Somewhat disagree (4)  
14  
15  Disagree (5)  
16  
17  Don't know (6)  
18  
19  
20  
21  
22  
23
- 

24  
25  
26  
27 Q52 The initiative was hampered by opposition from within the host organisation.  
28  
29

- 30  Agree (1)  
31  
32  Somewhat agree (2)  
33  
34  Neither agree nor disagree (3)  
35  
36  Somewhat disagree (4)  
37  
38  Disagree (5)  
39  
40  Don't know (6)  
41  
42  
43  
44  
45  
46  
47
-

1  
2  
3 Q53 The host organisation lacked the necessary values/culture to support and sustain the  
4 initiative.  
5

- 6  Agree (1)  
7  
8  Somewhat agree (2)  
9  
10  
11  Neither agree nor disagree (3)  
12  
13  
14  Somewhat disagree (4)  
15  
16  
17  Disagree (5)  
18  
19  
20  Don't know (6)  
21  
22  
23
- 

24  
25  
26  
27 Q97 Insights or details relating to the host organisation within which this initiative was situated,  
28 and how this has impacted on whether the initiative has become sustained and embedded:  
29

30  
31 \_\_\_\_\_  
32  
33 \_\_\_\_\_  
34  
35 \_\_\_\_\_  
36  
37 \_\_\_\_\_  
38  
39 \_\_\_\_\_  
40

41 **End of Block: The organisation**

---

42  
43 **Start of Block: Personal factors**

44  
45  
46 **Q148 Factors relating to yourself.**

47 Please use the free text box at the bottom to help us understand any factors that you feel are  
48 particularly important. We respect your privacy: individual responses will not be linked to you or  
49 your project. Please skip any questions you do not feel comfortable answering.  
50  
51

---

1  
2  
3 Q150 I was released from other duties so that I could implement this initiative.  
4  
5

- 6  Agree (1)  
7  
8  Somewhat agree (2)  
9  
10  
11  Neither agree nor disagree (3)  
12  
13  
14  Somewhat disagree (4)  
15  
16  
17  Disagree (5)  
18  
19  
20  Don't know (6)  
21  
22
- 

23  
24  
25  
26 Q151 I had a supportive peer network that I could discuss any issues or problems with.  
27

- 28  Agree (1)  
29  
30  
31  Somewhat agree (2)  
32  
33  
34  Neither agree nor disagree (3)  
35  
36  
37  Somewhat disagree (4)  
38  
39  
40  Disagree (5)  
41  
42  
43  Don't know (6)  
44  
45
-

1  
2  
3 Q152 I was internally motivated to implement this initiative.  
4

- 5  Agree (1)  
6  
7  
8  Somewhat agree (2)  
9  
10  
11  Neither agree nor disagree (3)  
12  
13  
14  Somewhat disagree (4)  
15  
16  
17  Disagree (5)  
18  
19  
20  Don't know (6)  
21  
22
- 

23  
24  
25  
26 Q78 I found working on the initiative personally rewarding.  
27

- 28  Agree (1)  
29  
30  
31  Somewhat agree (2)  
32  
33  
34  Neither agree nor disagree (3)  
35  
36  
37  Somewhat disagree (4)  
38  
39  
40  Disagree (5)  
41  
42  
43  Don't know (6)  
44  
45
-



1  
2  
3 Q153 I feel I had the right skills/experience/training to implement and sustain the initiative.  
4  
5

- 6  Agree (1)  
7  
8  Somewhat agree (2)  
9  
10  
11  Neither agree nor disagree (3)  
12  
13  
14  Somewhat disagree (4)  
15  
16  
17  Disagree (5)  
18  
19  
20  Don't know (6)  
21  
22

23  
24  
25  
26 Q149 I had sufficient energy and time to dedicate to the initiative.  
27

- 28  Agree (1)  
29  
30  
31  Somewhat agree (2)  
32  
33  
34  Neither agree nor disagree (3)  
35  
36  
37  Somewhat disagree (4)  
38  
39  
40  Disagree (5)  
41  
42  
43  Don't know (6)  
44  
45

46  
47  
48 Q154 Insights or details relating to yourself, and how this has impacted on whether the  
49 initiative has become sustained and embedded:  
50  
51

52 \_\_\_\_\_  
53  
54 \_\_\_\_\_  
55

1  
2  
3  
4  
5  
6  
7  
8  
9  
10 **End of Block: Personal factors**

---

11  
12 **Start of Block: Implementation**

13  
14  
15 **Q55 Factors relating to how the project was implemented.**

16 Please use the free text box at the bottom to help us understand any factors that you feel are  
17 particularly important.  
18  
19

---

20  
21  
22  
23 **Q54 The project had sufficient input from experts with the necessary knowledge and**  
24 **experience.**

- 25  
26  Agree (1)  
27  
28  Somewhat agree (2)  
29  
30  Neither agree nor disagree (3)  
31  
32  Somewhat disagree (4)  
33  
34  Disagree (5)  
35  
36  Don't know (6)  
37  
38  
39  
40  
41  
42  
43  
44  
45  
46  
47  
48  
49  
50  
51  
52  
53  
54  
55  
56  
57  
58  
59  
60

1  
2  
3 Q56 The outcomes and impact of the project were measured or assessed.  
4  
5

- 6  Agree (1)  
7  
8  Somewhat agree (2)  
9  
10  
11  Neither agree nor disagree (3)  
12  
13  
14  Somewhat disagree (4)  
15  
16  
17  Disagree (5)  
18  
19  
20  Don't know (6)  
21  
22
- 

23  
24  
25  
26 Q57 We were able to demonstrate the effectiveness of the project.  
27

- 28  Agree (1)  
29  
30  
31  Somewhat agree (2)  
32  
33  
34  Neither agree nor disagree (3)  
35  
36  
37  Somewhat disagree (4)  
38  
39  
40  Disagree (5)  
41  
42  
43  Don't know (6)  
44  
45
-

1  
2  
3 Q58 Performance data was gathered and reported on a regular basis.  
4

- 5  Agree (1)  
6  
7  
8  Somewhat agree (2)  
9  
10  
11  Neither agree nor disagree (3)  
12  
13  
14  Somewhat disagree (4)  
15  
16  
17  Disagree (5)  
18  
19  
20  Don't know (6)  
21  
22
- 

23  
24  
25  
26 Q59 Steps were taken to systematically improve and adapt the project.  
27

- 28  Agree (1)  
29  
30  
31  Somewhat agree (2)  
32  
33  
34  Neither agree nor disagree (3)  
35  
36  
37  Somewhat disagree (4)  
38  
39  
40  Disagree (5)  
41  
42  
43  Don't know (6)  
44  
45
-

1  
2  
3 Q60 There was ongoing orientation and training available e.g. to new staff or to build capacity.  
4  
5

- 6  Agree (1)  
7  
8  Somewhat agree (2)  
9  
10  
11  Neither agree nor disagree (3)  
12  
13  
14  Somewhat disagree (4)  
15  
16  
17  Disagree (5)  
18  
19  
20  Don't know (6)  
21  
22
- 

23  
24  
25  
26 Q61 Staff were given time/incentives to attend the necessary training.  
27

- 28  Agree (1)  
29  
30  
31  Somewhat agree (2)  
32  
33  
34  Neither agree nor disagree (3)  
35  
36  
37  Somewhat disagree (4)  
38  
39  
40  Disagree (5)  
41  
42  
43  Don't know (6)  
44  
45
-

1  
2  
3 Q62 Staff were required to attend the necessary training.  
4

- 5  Agree (1)  
6  
7  
8  Somewhat agree (2)  
9  
10  
11  Neither agree nor disagree (3)  
12  
13  
14  Somewhat disagree (4)  
15  
16  
17  Disagree (5)  
18  
19  
20  Don't know (6)  
21  
22

23  
24  
25  
26 Q105 Insights or details relating to how the project was implemented, and how this has  
27 impacted on whether the initiative has become sustained and embedded:  
28

29  
30  
31  
32  
33  
34  
35  
36  
37  
38

39  
40 **End of Block: Implementation**  
41

42 **Start of Block: The work/tasks**  
43  
44

45 **Q64 Factors relating to the tasks of the project.**

46 Please use the free text box at the bottom to help us understand any factors that you feel are  
47 particularly important.  
48  
49

1  
2  
3 Q63 The initiative was difficult or complex to deliver.  
4

- 5  Agree (1)  
6  
7  
8  Somewhat agree (2)  
9  
10  
11  Neither agree nor disagree (3)  
12  
13  
14  Somewhat disagree (4)  
15  
16  
17  Disagree (5)  
18  
19  
20  Don't know (6)  
21  
22
- 

23  
24  
25  
26 Q65 The initiative helped to make things easier or more efficient.  
27

- 28  Agree (1)  
29  
30  
31  Somewhat agree (2)  
32  
33  
34  Neither agree nor disagree (3)  
35  
36  
37  Somewhat disagree (4)  
38  
39  
40  Disagree (5)  
41  
42  
43  Don't know (6)  
44  
45
-

1  
2  
3 Q66 The initiative did not require special or extra effort.  
4

- 5  Agree (1)  
6  
7  
8  Somewhat agree (2)  
9  
10  
11  Neither agree nor disagree (3)  
12  
13  
14  Somewhat disagree (4)  
15  
16  
17  Disagree (5)  
18  
19  
20  Don't know (6)  
21  
22

23  
24  
25  
26 Q67 I believe that the staff delivering the initiative found the work/tasks rewarding and  
27 satisfying.  
28

- 29  Agree (1)  
30  
31  
32  Somewhat agree (2)  
33  
34  
35  Neither agree nor disagree (3)  
36  
37  
38  Somewhat disagree (4)  
39  
40  
41  Disagree (5)  
42  
43  
44  Don't know (6)  
45  
46

47  
48  
49  
50 Q109 Insights or details relating to the tasks of the project, and how this has impacted on  
51 whether the initiative has become sustained and embedded:  
52

53  
54 \_\_\_\_\_  
55  
56 \_\_\_\_\_  
57



1  
2  
3  
4  
5  
6  
7  
8  
9  
10 **End of Block: The work/tasks**

---

11  
12 **Start of Block: Team processes**

13  
14  
15 **Q68 Factors relating to team processes.**

16 Your answers will not be fed back directly to the team, however they may be used to identify  
17 training needs across the network. Please use the free text box at the bottom to help us  
18 understand any factors that you feel are particularly important.  
19  
20  
21  
22  
23

---

24 **Q69 The project team worked well together.**

- 25  
26  Agree (1)  
27  
28  Somewhat agree (2)  
29  
30  Neither agree nor disagree (3)  
31  
32  Somewhat disagree (4)  
33  
34  Disagree (5)  
35  
36  Don't know (6)  
37  
38  
39  
40  
41  
42  
43  
44  
45  
46  
47  
48  
49  
50  
51  
52  
53  
54  
55  
56  
57  
58  
59  
60

1  
2  
3 Q70 There were clear responsibilities for individuals: the work was shared across the team.  
4  
5

- 6  Agree (1)  
7  
8  Somewhat agree (2)  
9  
10  
11  Neither agree nor disagree (3)  
12  
13  
14  Somewhat disagree (4)  
15  
16  
17  Disagree (5)  
18  
19  
20  Don't know (6)  
21  
22
- 

23  
24  
25  
26 Q71 Project was overly dependent on a particular individual or individuals.  
27

- 28  Agree (1)  
29  
30  
31  Somewhat agree (2)  
32  
33  
34  Neither agree nor disagree (3)  
35  
36  
37  Somewhat disagree (4)  
38  
39  
40  Disagree (5)  
41  
42  
43  Don't know (6)  
44  
45
-

1  
2  
3 Q72 I believe that the team understood what the project was trying to achieve and that it would  
4 lead to improved processes and outcomes.  
5

- 6  Agree (1)  
7  
8  Somewhat agree (2)  
9  
10  
11  
12  Neither agree nor disagree (3)  
13  
14  
15  Somewhat disagree (4)  
16  
17  
18  Disagree (5)  
19  
20  
21  Don't know (6)  
22  
23
- 

24  
25  
26  
27 Q73 There were rewards or incentives that supported engagement with, and continued delivery  
28 of, the initiative.  
29

- 30  
31  Agree (1)  
32  
33  Somewhat agree (2)  
34  
35  
36  Neither agree nor disagree (3)  
37  
38  
39  Somewhat disagree (4)  
40  
41  
42  Disagree (5)  
43  
44  
45  Don't know (6)  
46  
47  
48
-

1  
2  
3 Q74 The activities and roles of the initiative were incorporated into job descriptions.  
4  
5

- 6  Agree (1)  
7  
8  Somewhat agree (2)  
9  
10  
11  Neither agree nor disagree (3)  
12  
13  
14  Somewhat disagree (4)  
15  
16  
17  Disagree (5)  
18  
19  
20  Don't know (6)  
21  
22
- 

23  
24  
25  
26 Q75 Staff had time within their working hours to complete the tasks of the initiative.  
27

- 28  Agree (1)  
29  
30  
31  Somewhat agree (2)  
32  
33  
34  Neither agree nor disagree (3)  
35  
36  
37  Somewhat disagree (4)  
38  
39  
40  Disagree (5)  
41  
42  
43  Don't know (6)  
44  
45
-

1  
2  
3 Q76 The initiative had leadership and/or champions who were committed and capable.  
4  
5

- 6  Agree (1)  
7  
8  Somewhat agree (2)  
9  
10  
11  Neither agree nor disagree (3)  
12  
13  
14  Somewhat disagree (4)  
15  
16  
17  Disagree (5)  
18  
19  
20  Don't know (6)  
21  
22
- 

23  
24  
25  
26 Q77 There was an appropriate balance of power between those involved with the initiative.  
27

- 28  Agree (1)  
29  
30  
31  Somewhat agree (2)  
32  
33  
34  Neither agree nor disagree (3)  
35  
36  
37  Somewhat disagree (4)  
38  
39  
40  Disagree (5)  
41  
42  
43  Don't know (6)  
44  
45
-

1  
2  
3 Q78 Team members were able to express their opinions, and their opinions were valued.  
4

- 5  Agree (1)  
6  
7  
8  Somewhat agree (2)  
9  
10  
11  Neither agree nor disagree (3)  
12  
13  
14  Somewhat disagree (4)  
15  
16  
17  Disagree (5)  
18  
19  
20  Don't know (6)  
21  
22

23  
24  
25  
26 Q119 Insights or details relating to team dynamics and processes, and how these impacted on  
27 whether the initiative has become sustained and embedded:  
28

29  
30  
31  
32  
33  
34  
35  
36  
37  
38

39  
40 **End of Block: Team processes**  
41

42 **Start of Block: Participation**  
43  
44

45 **Q79 Factors relating to ownership and involvement in the project.**

46 Please use the free text box at the bottom to help us understand any factors that you feel are  
47 particularly important.  
48  
49

1  
2  
3 Q80 There was a sense of ownership and commitment by those involved with the initiative.  
4  
5

- 6  Agree (1)  
7  
8  Somewhat agree (2)  
9  
10  
11  Neither agree nor disagree (3)  
12  
13  
14  Somewhat disagree (4)  
15  
16  
17  Disagree (5)  
18  
19  
20  Don't know (6)  
21  
22
- 

23  
24  
25  
26 Q81 Staff who were responsible for delivering the initiative were involved as partners, and were  
27 able to shape the initiative.  
28

- 29  Agree (1)  
30  
31  
32  Somewhat agree (2)  
33  
34  
35  Neither agree nor disagree (3)  
36  
37  
38  Somewhat disagree (4)  
39  
40  
41  Disagree (5)  
42  
43  
44  Don't know (6)  
45  
46  
47
-

1  
2  
3 Q82 The beneficiaries (patients/service users) were involved as partners, and were able to  
4 shape the initiative.  
5

- 6  Agree (1)  
7  
8  Somewhat agree (2)  
9  
10  
11  
12  Neither agree nor disagree (3)  
13  
14  
15  Somewhat disagree (4)  
16  
17  
18  Disagree (5)  
19  
20  
21  Don't know (6)  
22  
23
- 

24  
25  
26  
27 Q83 The community in which it was situated were involved as partners, and were able to shape  
28 the initiative.  
29

- 30  
31  Agree (1)  
32  
33  Somewhat agree (2)  
34  
35  
36  
37  Neither agree nor disagree (3)  
38  
39  
40  Somewhat disagree (4)  
41  
42  
43  Disagree (5)  
44  
45  
46  Don't know (6)  
47  
48
-



1  
2  
3 Q84 There was a collaborative network of people/organisations that helped to support and  
4 sustain the initiative.  
5

- 6  Agree (1)  
7  
8  Somewhat agree (2)  
9  
10  
11  
12  Neither agree nor disagree (3)  
13  
14  
15  Somewhat disagree (4)  
16  
17  
18  Disagree (5)  
19  
20  
21  Don't know (6)  
22  
23
- 

24  
25  
26  
27 Q85 It felt as though the initiative was imposed on us and there was little sense of ownership or  
28 commitment to the project.  
29

- 30  
31  Agree (1)  
32  
33  Somewhat agree (2)  
34  
35  
36  
37  Neither agree nor disagree (3)  
38  
39  
40  Somewhat disagree (4)  
41  
42  
43  Disagree (5)  
44  
45  
46  Don't know (6)  
47  
48
- 

49  
50  
51 Q125 Insights or details relating to ownership or involvement in the project, and how these  
52 impacted on whether the initiative has become sustained and embedded:  
53  
54  
55 \_\_\_\_\_  
56  
57  
58

1  
2  
3  
4  
5  
6  
7  
8  
9  
10  
11  
12  
13  
14  
15  
16  
17  
18  
19  
20  
21  
22  
23  
24  
25  
26  
27  
28  
29  
30  
31  
32  
33  
34  
35  
36  
37  
38  
39  
40  
41  
42  
43  
44  
45  
46  
47  
48  
49  
50  
51  
52  
53  
54  
55  
56  
57  
58  
59  
60

---

---

---

---

**End of Block: Participation**

---

**Start of Block: End of survey**

Thank you for taking part in this survey. If you have any questions please contact the lead researcher [kathleen.leadham-green@kcl.ac.uk](mailto:kathleen.leadham-green@kcl.ac.uk).

**End of Block: End of survey**

---

For peer review only

# BMJ Open

## Success and limiting factors in health service innovation: a theory generating mixed-methods evaluation of UK projects

|                                 |                                                                                                                                                                                                                                                                                                                                                |
|---------------------------------|------------------------------------------------------------------------------------------------------------------------------------------------------------------------------------------------------------------------------------------------------------------------------------------------------------------------------------------------|
| Journal:                        | <i>BMJ Open</i>                                                                                                                                                                                                                                                                                                                                |
| Manuscript ID                   | bmjopen-2020-047943.R1                                                                                                                                                                                                                                                                                                                         |
| Article Type:                   | Original research                                                                                                                                                                                                                                                                                                                              |
| Date Submitted by the Author:   | 30-Mar-2021                                                                                                                                                                                                                                                                                                                                    |
| Complete List of Authors:       | Leedham-Green, Kathleen; Imperial College London, Medical Education Research Unit, Faculty of Medicine<br>Knight, Alec; King's College London Faculty of Life Sciences and Medicine, School of Population Health & Environmental Sciences<br>Reedy, Gabriel; King's College London Faculty of Life Sciences and Medicine, Centre for Education |
| <b>Primary Subject Heading</b>: | Health services research                                                                                                                                                                                                                                                                                                                       |
| Secondary Subject Heading:      | Evidence based practice, Health policy                                                                                                                                                                                                                                                                                                         |
| Keywords:                       | HEALTH SERVICES ADMINISTRATION & MANAGEMENT, Health policy < HEALTH SERVICES ADMINISTRATION & MANAGEMENT, Change management < HEALTH SERVICES ADMINISTRATION & MANAGEMENT, Quality in health care < HEALTH SERVICES ADMINISTRATION & MANAGEMENT, Organisational development < HEALTH SERVICES ADMINISTRATION & MANAGEMENT                      |
|                                 |                                                                                                                                                                                                                                                                                                                                                |

SCHOLARONE™  
Manuscripts



I, the Submitting Author has the right to grant and does grant on behalf of all authors of the Work (as defined in the below author licence), an exclusive licence and/or a non-exclusive licence for contributions from authors who are: i) UK Crown employees; ii) where BMJ has agreed a CC-BY licence shall apply, and/or iii) in accordance with the terms applicable for US Federal Government officers or employees acting as part of their official duties; on a worldwide, perpetual, irrevocable, royalty-free basis to BMJ Publishing Group Ltd ("BMJ") its licensees and where the relevant Journal is co-owned by BMJ to the co-owners of the Journal, to publish the Work in this journal and any other BMJ products and to exploit all rights, as set out in our [licence](#).

The Submitting Author accepts and understands that any supply made under these terms is made by BMJ to the Submitting Author unless you are acting as an employee on behalf of your employer or a postgraduate student of an affiliated institution which is paying any applicable article publishing charge ("APC") for Open Access articles. Where the Submitting Author wishes to make the Work available on an Open Access basis (and intends to pay the relevant APC), the terms of reuse of such Open Access shall be governed by a Creative Commons licence – details of these licences and which [Creative Commons](#) licence will apply to this Work are set out in our licence referred to above.

Other than as permitted in any relevant BMJ Author's Self Archiving Policies, I confirm this Work has not been accepted for publication elsewhere, is not being considered for publication elsewhere and does not duplicate material already published. I confirm all authors consent to publication of this Work and authorise the granting of this licence.

# Success and limiting factors in health service innovation: a theory generating mixed-methods evaluation of UK projects

Kathleen Leedham-Green<sup>1</sup> (corresponding author)

Alec Knight<sup>2</sup>

Gabriel B Reedy<sup>3</sup>

<sup>1</sup>Imperial College London, Medical Education Research Unit, Faculty of Medicine

London, UK

[k.leedham-green@imperial.ac.uk](mailto:k.leedham-green@imperial.ac.uk)

<sup>2</sup>King's College London Faculty of Life Sciences and Medicine, School of Population Health &

Environmental Sciences

London, UK

[alec.knight@kcl.ac.uk](mailto:alec.knight@kcl.ac.uk)

<sup>3</sup>King's College London Faculty of Life Sciences and Medicine, Centre for Education

London, UK

[gabriel.reedy@kcl.ac.uk](mailto:gabriel.reedy@kcl.ac.uk)

## Keywords

Health services research

Diffusion of innovation

Organisational innovation

## Word count

5435

## Abstract

**Objectives** To explore and explain success and limiting factors in UK health service innovation.

**Design** Mixed methods evaluation of a series of health service innovations involving a survey and interviews, with theory-generating analysis.

**Setting** The research explored innovations supported by one of the UK's Academic Health Science Networks which provides small grants, awards and structural support to health service innovators including clinical academics, health and social care professionals, and third sector organisations.

**Participants** All recipients of funding or support 2014-18 were invited to participate. We analysed survey responses relating to 56 innovation projects.

**Results** Responses were used to conceptualise success along two axes: value creation for the intended beneficiaries and expansion beyond its original pilot. An analysis of variance between categories of success indicated that participation, motivation and evaluation were critical to value generation; organisational, educational and administrative support were critical to expansion; and leadership and collaborative expertise were critical to both value creation and expansion. Additional limiting factors derived from qualitative responses included difficulties navigating the boundaries and intersections between organisations, professions, sectors and cultures; a lack of support for innovation beyond the start-up phase; a lack of protected time; and staff burnout and turnover.

**Conclusions** A nested hierarchy of innovation needs has been derived via an analysis of these factors, providing targeted suggestions to enhance the success of future innovations.

## Article summary

### Strengths and limitations

- A strength of this research is that it compares many innovations in a consistent way, and that it provides insights across a range of categories of success.
- A limitation of this research is that it is situated in a single geographical context; however, repeating these methods in different contexts should produce locally relevant results.
- Few mid-level theories relating to innovation are grounded in data that include projects that have not achieved their intended outcomes; therefore, we may have identified novel insights.
- Many of the success factors we have identified are not unique to this study; however, they have been subjected to further statistical analysis and found to differentiate significantly across categories of success in this context.
- More research is needed to examine whether addressing these factors prospectively enhances the success of future innovations.

# Success and limiting factors in health service innovation: a theory generating mixed-methods evaluation of UK projects

## Background

Healthcare systems worldwide are faced with increasing demand linked to the rising burden of disease within a resource-constrained environment <sup>1</sup>. This has led to a pressing need to find and disseminate innovative ways of meeting the healthcare needs of patients and communities in ways that are more sustainable <sup>2</sup>. The World Health Organisation characterises health service innovation as “a novel set of behaviours, routines, and ways of working that are discontinuous with previous practice, are directed at improving health outcomes, administrative efficiency, cost-effectiveness, or users’ experience and that are implemented by planned and coordinated actions” <sup>3</sup> (p7).

Academic efforts in the health sciences continue to sharpen the focus on impact, rather than the creation of ‘new knowledge’ as the primary goal of research activity. At the vanguard are implementation scientists who work to translate research and innovation into clinical practice, navigating institutional, organisational, structural and cultural complexities to improve services <sup>4</sup>. New support structures have emerged, such as the fifteen Academic Health Science Networks set up in 2013 by NHS England, with funding streams that aim to support and encourage innovation at various levels <sup>5</sup>. After more than half a decade of programme grants, the impact of these innovation programmes is a legitimate subject of enquiry: how and why have certain innovations become normalised, sustained or spread, and why have others struggled or stopped?

The knowledge created through an individual innovation is likely to be complex and context-dependent, providing insights that may not necessarily be generalisable <sup>6</sup>. Meta-analyses are faced with the complexity of synthesising multiple project evaluations that may be reported in different ways. The published literature on health service innovation contains few analyses of unsuccessful innovations, despite attempts to encourage negative reporting <sup>7</sup>. By evaluating a large corpus of projects across one of these academic health sciences networks in a systematic way, we have an opportunity to directly compare innovations including those that may have struggled or stopped and not reached the literature.

This study thus sets out to explore a large number of innovations, both as individual projects in their unique local contexts, and as part of a larger integrative study. By isolating the factors that differentiate between categories of success, our aim is to produce an empirically-derived explanatory model, and thereby to inform and enhance the success of future innovations.



## Methods

### Research aim

To explore and explain success and limiting factors in health service innovation.

### Methodological orientation and theory

This study is situated at the intersection of policy, social sciences, and organisational research. Our philosophical assumptions are that there are real differences in the success of innovations, but also that success is fundamentally a subjective construct. Any research will only produce an approximation of the truth, and findings must be interpreted with an appreciation for context. We therefore position this research at the boundary of critical realism and constructivism<sup>8</sup>.

Adopting Varpio's terminology on the philosophy of research, we are taking an inductive approach that works towards a theoretical framework, rather than applying a pre-existing theoretical framework to this study<sup>9</sup>.

We have adopted what Creswell refers to as a sequential mixed-methods design<sup>10</sup>. According to Creswell, insight can emerge from exploring first through qualitative methods (in our case a published qualitative review and interviews) the types of factors that might be important, and then designing questionnaires to explore their salience to a population (called an 'exploratory sequential design'). Insight can also emerge from collecting survey data initially and then following up with interviews to help explain the survey results in more detail: an 'explanatory sequential design'. Where both qualitative and quantitative data are collected simultaneously, one set of data can be used to triangulate the other (for example, where the meaning of one is unclear), or they can be used in complementary ways to illuminate each other (for example, one determining which factors are important, the other illuminating why that might be). Our research process involves both exploratory and explanatory aspects as well as triangulation and illumination. It is summarised in Figure 1.

### Context

The Health Innovation Network (HIN) is one of the nationally-funded Academic Health Science Networks set up by NHS England in 2013. It provides small grants, awards and structural support to academics, health and social care professionals and third-sector organisations, supporting service-level innovations to improve outcomes and value, including the sustainable use of resources. In addition, in the years 2014-2017, Health Education England (South London) provided investment in training and education innovation projects across healthcare settings in south London, through its strategic investment programme.

## Participants and sampling

All recipients of HIN funding and Health Education England (South London) strategic investment programme funding and support during the years 2014-2018 were invited to participate. As our sample size was moderate, we aimed to analyse all responses and retrospectively determine whether the sample size was sufficient for thematic saturation and statistical inference. We achieved *a priori* thematic saturation for success factors (exemplar comments for each significant factor that we found) and inductive thematic saturation for limiting factors (content coded until no new themes arose) <sup>11</sup>.

## Research team and ethics

The research was commissioned by HIN in collaboration with Health Education England and conducted by an independent research team at King's College London. The research team comprised a postdoctoral educational psychologist/learning scientist (GR), a postdoctoral occupational psychologist/health services researcher (AK), and a medical education research fellow (KLG). None were in a position of power or influence over participants, and the research was carefully designed to be conducted at arm's length from the funding agency. Survey responses were collected anonymously and decontextualised by the research team to encourage innovators to comment critically and safely about their projects. HIN funding was not conditional on taking part in this research. Ethical approval was granted on 26-Mar-2019 by the Research Ethics Committee of Kings College London (LRS-18/19-10432). Written informed consent was obtained from interviewees. Consent was implied from participation in the survey.

## Patient and public involvement

No patient involved. The primary stakeholders in this research were health service innovators who were involved in the survey design and in checking back and refining our interpretation.

## Data generation methods

### Figure 1: Research overview

## Survey design

The survey design began with the extraction of potential success factors for health service innovation from a recently published qualitative systematic review <sup>12</sup>. This review aimed to identify all the factors and theories associated with sustainability and scale-up (capacity building) of innovations in health services research. KLG validated and expanded these factors through scoping interviews with five experienced health service innovators. The interviews started with an open exploration of what the innovator felt had impacted on the success of their project, followed by

1  
2  
3 discussion on the factors identified through the literature. Personal factors were mentioned by all  
4 stakeholders in addition to the factors from the review, suggesting these may be under-reported. An  
5 additional theme (personal factors) with related sub-factors was therefore included, based on these  
6 interviews. Themes and factors are listed in Figure 2. These were used to create a mixed methods  
7 nested design survey<sup>13</sup> using Qualtrics software (full text in supplementary data).  
8  
9

10  
11  
12 The survey asked respondents to:

- 13  
14 a) Categorise and describe their project's current status (no longer running / likely to finish  
15 soon / stable at the level of the original pilot / scaled-up beyond the original pilot / too early  
16 to say / other)  
17  
18 b) Score statements (listed in table 1) relating to the impacts of each factor on their project's  
19 outcomes, grouped into nine themes on a five-point disagree/agree Likert scale.  
20  
21 c) Describe the status of their project and provide qualitative insights into each of the nine  
22 themes.  
23  
24  
25

26 Our five stakeholders helped to improve the clarity, acceptability and usability of the survey  
27 questions and instructions.  
28  
29

## 30 **Figure 2: Survey scope**

### 31 **Survey distribution**

32  
33 A neutral administrator from Health Education England distributed the survey by email in August and  
34 September 2019 to all 176 named recipients of HIN funding awards, grants and bursaries. A  
35 reminder was distributed four weeks later to participants who had not responded. Projects that had  
36 received more than one award were sent a single survey, and participants who had run more than  
37 one project were sent a separate survey for each project.  
38  
39  
40  
41  
42

### 43 **Stakeholder follow-up interviews**

44  
45 KLG checked back our results and interpretation with five stakeholders identified by HIN as  
46 experienced innovators, one of whom was also involved in the original scoping interviews.  
47 Interviews lasted 30 - 45 minutes and transcription was facilitated by automated software (otter.ai).  
48 These stakeholders helped to refine the model and confirmed its the applicability and utility in their  
49 context. No new themes arose, however quotes were used to enrich our survey data.  
50  
51  
52  
53

### 54 **Data analysis methods**

#### 55 **Development of categories of success**

56  
57 KLG and AK categorised projects into grades of success based on how the respondent self-  
58 categorised their project, triangulated against their qualitative survey responses. The categories of  
59  
60

1  
2  
3 success were derived through an iterative process, involving both researchers agreeing a descriptive  
4 summary of the status of each project (e.g. scaled down despite achieving better than expected  
5 patient outcomes; scaled down because the intervention didn't achieve its aims). We grouped  
6 projects with similar project outcomes together, and through a process of constant comparison <sup>14</sup>  
7 constructed a categorisation framework that accounted for all the cases in the set.  
8  
9  
10

### 11 **Determination of salience of success factors**

12 We adopted an exploratory approach to data analysis, which aims to generate rather than test  
13 theory <sup>15</sup>. KLG conducted an analysis of variance for each of the scored factors (Kruskal-Wallis non-  
14 parametric ANOVA on rank using IBM® SPSS® v25) to see whether there were significant  
15 differences between categories of success. The Kruskal-Wallis test does not assume a normal  
16 distribution in the data and can be used when the data is ordinal e.g. Likert scores. For asymmetric  
17 group sizes, the non-parametric Kruskal-Wallis test performs better than the parametric equivalent  
18 ANOVA method <sup>16</sup>.  
19  
20  
21  
22  
23  
24  
25

26 For each factor that was identified as being significantly different between categories of success, we  
27 conducted a secondary analysis (box plot for each category) to confirm the direction and consistency  
28 of the association. This is generated automatically by SPSS after a Kruskal-Wallis test. A graded  
29 'exposure-response' relationship across all grades of success would be expected if a factor genuinely  
30 drives success <sup>17</sup>. Where a graded relationship was not present, this is discussed in Table 1.  
31  
32  
33  
34

### 35 **Illumination of success factors**

36 KLG and AK extracted quotes from the survey and interviews relating to each significant success  
37 factor to generate a rich description within each theme.  
38  
39  
40

### 41 **Inductive analysis of limiting factors**

42 KLG coded the content of all qualitative data relating to challenges within projects that had not  
43 achieved their intended outcomes or that had scaled-down or stopped (n=21) facilitated by NVivo 12  
44 software. GR and KLG refined the codes and both authors worked together to inductively arrange  
45 the content into themes <sup>18</sup>.  
46  
47  
48  
49

### 50 **Development of final model**

51 We mapped significant factors onto a 2x2 grid using a natural logarithmic scatter plot so that factors  
52 that were significant to one dimension of success were mapped to the right half of the grid, factors  
53 that were significant to a second dimension of success were mapped to the top half, and factors that  
54 were significant to both were mapped to the top right quadrant. We grouped success factors into  
55 themes through a process of collaborative discussion, and we explored which themes predominated  
56 in each quadrant to generate our model which was checked back with stakeholders.  
57  
58  
59  
60

## Results

### Descriptive summary

We received 63 responses, but seven were incomplete or duplicate so a total of 56 responses (31.8% of 176) were included in the analysis. Each response related to a different innovation project. Survey respondents self-identified within one or more of the following groups: the project leadership team (n=54); service delivery team (n=9); training team (n=9); administrative team (n=6); service lead (n=2); and patient/service user (n=1). Several respondents identified within multiple groups.

Projects were situated in secondary care (n=19); community care (n=14); academic sector (n=5); mental health sector (n=4); online (n=4); primary care (n=3); and the hospice sector (n=2), with the remainder working at the interfaces between services, or across sectors. Their scope ranged from national programmes at hundreds of sites, local programmes supporting tens of thousands of patients, to small intensive innovations working in new ways with a few dozen complex patients, and their duration ranged from 1-5 years. The innovation areas related to new ways of working in end-of-life care; disability enablement; support for complex or vulnerable patients; discharge support; pain management; patient safety innovations; recovery and rehabilitation; personalised care; chronic conditions; new models of integrated health and social care; health promotion; and novel simulation and workforce development strategies. Projects can be explored at the HIN website <sup>19</sup>, however for reasons of confidentiality, we cannot specify which were included in this study.

### Categories of success

Our emergent framework categorised each project's success across two dimensions: the first relating to whether the innovation was reported as generating more or less than its anticipated value for patients/carers ('value creation axis'), the second according to whether the project became sustained or scaled up beyond the initial pilot, or whether it was scaled down or stopped ('expansion axis'). Innovations that were within the scope and intentions of the original pilot were positioned centrally. We initially scored projects into five categorisations across the expansion axis, as some projects expanded locally and some nationally, however there were not enough projects in each group and statistics became unreliable, so we made a pragmatic decision to adopt relative rather than absolute categories.

The resulting categorical framework is illustrated in Figure 3, with the number of innovations in each category shown in brackets.

### Figure 3: Framework for categorisation of success within health service innovation

#### Success factors

Our analysis of variance compared innovations that had demonstrated lower than expected value (n=11), value as expected (n=25), and higher than expected value (n=20). Next, we compared innovations that had diminished in scope or stopped (n=17), innovations that were running as expected (n=16), and innovations that had scaled up (n=23). Finally, we excluded low-value projects and analysed again across the expansion axis (n=10, n=12, and n=23, respectively), seeking to explore why innovations with proven value had not been scaled up.

Our analysis is presented in Table 1 with significant results ( $p < 0.05$ ) in bold and shaded. At this level of significance, there is a 1 in 20 probability that a result is in fact random. We have used lighter shading to indicate factors that might potentially be significant, or which could be found not to be significant if the power of the study was increased. The final column gives our interpretation of the more significant findings ( $p < 0.05$ ) that takes into consideration our secondary analysis.

Many factors were similarly scored across all categories of success, for example IT infrastructure. This does not mean that these factors are not important, only that they were experienced similarly across all categories of success and are therefore unlikely to be the underlying cause of the relative success or failure of a project.

#### Table 1: Analysis of variance of potential success factors across categories of success

We have collated the significant factors together in Table 2 with illuminative quotes, and we discuss both positive and negative findings within each of the nine survey themes below.

#### Project-related factors

Interestingly, the aims of the project did not appear to be critical to success. Both successful and unsuccessful innovations were similarly reported as being designed to address an important healthcare need that was concerning to the public. All funded projects were required to articulate a credible evidence base arguing that stated benefits could be achieved through the project plan.

#### Resourcing and expertise

All significant resource-related success factors were associated with the workforce. Non-critical factors included infrastructure (such as buildings, materials and supplies), which were reported as sufficient; information technology, which was moderately good across all categories of success; and funding issues, which were also similar across all categories of success. However, having the right numbers of staff with the right skills appeared to be highly significant, both in terms of the project being able to realise its intended value, as well as for it to become scaled up beyond the original

1  
2  
3 pilot. Staff with time and energy appeared critical to whether successful innovations became scaled  
4 up, as were administrative and educational support, including the availability of ongoing educational  
5 support (e.g. orientation and training for new staff, or to build capacity). Expertise appeared to be  
6 critical across all categories of success, both in terms of the innovator feeling they had the right  
7 skills, experience or training; the project having access to staff with the right skills; and having  
8 external expert input where needed.  
9  
10  
11  
12

### 13 External factors

14 Alignment to societal needs appeared to correlate with whether a project was able to realise its  
15 intended value, but less so with its expansion. However, as the effect size didn't grow consistently  
16 across categories of value creation, we cannot necessarily infer a causal relationship<sup>17</sup>. Qualitative  
17 comments indicated that projects that were able to align themselves to current political or societal  
18 agendas, such as mental health, were more successful. Conversely, those attempting to work in  
19 relatively less topical areas of practice described difficulty securing strategic funding, so we have  
20 tentatively included this factor in our model.  
21  
22  
23  
24  
25  
26  
27

### 28 Organisational factors

29 Our analysis of organisational factors indicated that the ability of an innovation to integrate into  
30 existing organisational structures, programmes or policies may be critical to whether it scales up,  
31 and possibly also to its ability to create value ( $p=0.059$ ). Successful projects described adapting  
32 where necessary to achieve a good fit within organisational priorities. For the most part, host  
33 organisations were described as having a positive learning culture and were ready and able to  
34 undertake innovative initiatives, however even innovations with proven value were unable to  
35 survive if there was opposition within the host organisation.  
36  
37  
38  
39  
40  
41

### 42 Personal factors

43 Few respondents reported being released from other duties so that they could implement their  
44 initiative. However, most respondents said they benefited from a supportive peer culture.  
45 Respondents who were able to realise value were significantly more like to say they were internally  
46 motivated and found working on the project rewarding.  
47  
48  
49  
50

### 51 Project management

52 Most projects measured or assessed the outcomes and impacts of the project, though this appeared  
53 to be more common in successful projects ( $p=0.060$ ). Projects with high value were able to  
54 demonstrate and share this success. Leadership appeared to be a highly significant success factor  
55 across all categories of success, with struggling or unsuccessful projects citing leadership failures.  
56  
57  
58  
59  
60



### The tasks of the project

Similarly to theme 2, which explored the aims of the project, the tasks of the project did not appear to be significantly different across categories of success.

### Collaborative and participatory practices

Valuing team members' opinions was highly significant across all categories of success and was present in *all* projects that were scaled up (hence variance not calculable). Participatory approaches were significantly associated with the ability of an innovation to generate value. These participatory processes related to the staff delivering the innovation, the intended beneficiaries, and the communities in which the innovations were situated.

Finally, one of the most significant differentiating factors across all categories of success was engagement with a collaborative network that helped to support and sustain the initiative.

### Limiting factor analysis

In addition to the above success factors, which were quantitatively identified, the following limiting factors were identified through our qualitative analysis of failed or struggling projects. As our limiting factor analysis is qualitative and interpretive, we present our data in line with our analysis.

### Boundaries between commercial, voluntary and public sectors

While UK healthcare is primarily publicly funded and provided by the National Health Service (NHS), social care is often commercially provided<sup>20</sup>, creating the potential for friction at the interfaces between these sectors.

*“As the care homes are private businesses, there was some lack of political will to embrace the training, as there was a view that although there was the potential to improve health outcomes for the residents, the manager did not feel there were sufficient resources to implement the required training” R4*

Commercial organisations were reported as unwilling to release staff for training unless the value of that training was felt within the organisation. Valuable initiatives by the voluntary sector to train social care staff, but which provided benefits in the healthcare sector, fell between sectors and were potentially unviable without direct funding.

*“The voluntary sector is happy to participate but there is no spare capacity within it unless there is a financial package that can go with it.” R35*

There was concern that privately-funded organisations were not subject to the same standards and mandates as the publicly funded bodies, and were failing to invest in training.



1  
2  
3 *“Because it is not mandated, organisations do not have to engage with or release staff for*  
4 *education.” R2*

6  
7 Restructuring within the NHS has created a set of semi-autonomous institutions and organisations  
8 with different and sometimes competing priorities<sup>21</sup>. Some participants described difficulty aligning  
9 project aims to multiple organisational goals.

11  
12 *“There were tensions between the two boroughs in relation to approach & resourcing. There*  
13 *was also a tension between commissioner expectations and practice/federation expectations*  
14 *which have impacted on the programmes sustainability.” R16*

16  
17 *“So, this intervention has a good return on investment, for every £1 you spend you get a*  
18 *return of £5.20. And they'll say, I'm the one making the investment, but he's the one making*  
19 *the return here. I've got a budget; he's got another budget. We might both be in the health*  
20 *system, but I'm not going to spend my money if he's the one getting the return.” F12*

## 25 Workplace cultures and priorities

26  
27 Some projects reported finding non-healthcare workers receptive to health-related training,  
28 however some failed or struggling projects found this a challenge.

29  
30 *“medicines delivery teams unwilling to take on additional role” R61*

31  
32 *“There were concerns raised by care home managers that the initiative would cause undue*  
33 *responsibility on individuals to make clinical decisions.” R16*

34  
35 Participants described differences between academic and workplace learning cultures, and variable  
36 receptiveness of front-line clinical staff to change. Some described resistance to outsiders telling  
37 healthcare workers how to improve. This may reflect the inverse of high value projects, which were  
38 found to engage in participatory practices, engaging patients, front-line staff and communities in co-  
39 designing their innovation.

40  
41 *“It has been difficult to embed these products due to structural issues within the staff teams.*  
42 *(Nursing) It was clearly not seen as a priority.” R20*

43  
44 *“I think the main insight I would have is that when working with mental health nursing teams*  
45 *the researcher and research team needs to be fully integrated into team(s) and seen as part*  
46 *of the culture. Being an outsider does not seem to work as day-to-day practice seems to*  
47 *regulate research.” R20*

48  
49 Participants also described tensions between management priorities and the priorities of those  
50 working directly with patients.

1  
2  
3 *"No interest on part of management. I don't think they have even read it."* R57  
4

5 *"The initiative was welcomed at service level, however there was little interest at senior*  
6 *management level."* R52  
7

8  
9 *"There is such a dislocation between commissioning and what is happening on the ground."*  
10  
11 FI2  
12

### 13 14 Lack of support beyond the start-up phase

15 Participants noted ongoing privileging of new innovation over sustaining or scaling up innovations  
16 that have already demonstrated their value. For example, clinical academics do not gain publications  
17 for ongoing maintenance of innovative practice:  
18

19  
20 *"research remit probably wouldn't cover [further dissemination] unless there was a good*  
21 *likelihood of REFability"* ["REF" refers to the Research Excellence Framework, a scoring  
22 system used to fund the university sector] R1  
23  
24

25  
26 Participants described innovation funding streams, but articulated difficulty securing funding beyond  
27 the start-up phase.  
28

29  
30 *"The project was resourced sufficiently for the pilot. However, once the pilot finished so did*  
31 *the project."* R5  
32

33  
34 *"the education faculty and funding is driven towards innovation and not sustainability - this*  
35 *de-incentives individuals from continuing with existing projects"* R8  
36  
37

### 38 39 Burnout, turnover and lack of protected time

40 Participants described projects that were limited by staff burnout, turnover, and a lack of protected  
41 time.  
42

43  
44 *"My commitment to the project was there however the resources I had to continue with*  
45 *project were limited due to competing pressures on my time."* R12  
46

47  
48 *"The programme required more administrative support than anticipated & this ended up*  
49 *being an ask over & above someone's day job for a prolonged period of time"* R16  
50

51  
52 *"the most important person was our pharmacist who moved from the pharmacy a few*  
53 *months after we started!"* R61  
54  
55  
56  
57  
58  
59  
60

## Risk as integral to innovation

Finally, it is worth noting that participants felt that risk was a necessary ingredient of healthcare innovation. Innovations that fail to demonstrate value should be supported in folding without hesitation, and lessons shared.

*“The project demonstrated that this initiative was not a model that would work in the hospital environment hence could not be embedded” R30*

## Final framework

We created two 2x2 matrices containing all the significant success factors across each dimension of success, shown in Figure 4. The matrix on the right excluded low-value projects in the calculation of factors significant to expansion and served to support the inclusion of some marginal factors in the final model as they became more significant despite lower power.

### Figure 4: Critical success factors plotted according to their salience to success

Figure 4 shows clearly congruent clusters of factors in each quadrant, indicating that some types of factors may be more important to expansion, whilst others are more important to value creation. These clusters relate to skills & expertise, leadership & motivation, organisational fit & structural support, societal alignment & participation, and evaluation.

As outlined in table 1, there are questions as to whether evaluation and motivation are dependent rather than independent variables: does finding working on a project personally rewarding drive success or vice versa, and does a positive evaluation drive success or vice versa? Triangulation with qualitative comments (in table 2) suggest that evaluation and motivation may drive success, so they have been tentatively included in our final model.

Themes that were predominantly related to value creation (participation, motivation and evaluation) were labelled **value-creation factors**. Themes that were predominantly significant to expansion (organisational fit & structural support) were labelled **expansion factors**. Themes that were significant to both axes (expertise, leadership and a supportive network) were labelled **core success factors**. We arranged success factors into a nested hierarchy, as innovations that do not generate value are unlikely to be scaled up. Our final model in Figure 5, also lists potential **limiting factors** identified through our inductive qualitative analysis .

### Figure 5: Nested hierarchy of success factors and limiting factors for health service innovation

## Discussion

This analysis of 56 health service innovation projects has enabled us to propose a model for understanding success in health service innovation that has two discrete axes: one relating to whether or not the innovation created value for its intended beneficiaries; the other relating to whether or not it was scaled up beyond the original pilot. Comparing projects across these dimensions of success has enabled us to hypothesise that:

- The core drivers of success are leadership and collaborative expertise (leadership skills and commitment, expert input, sufficient staff with the right skills and expertise, and a supportive collaborative network)
- The drivers of value creation for the intended beneficiaries are participation, motivation and evaluation (involvement of patients, public, practitioners and communities, alignment to societal needs, internal motivation, finding the project work rewarding, ability to demonstrate benefits and having opportunities to share impacts)
- The drivers of sustainability and scale-up are organisation fit and structural support (organisational fit and alignment, administrative and educational support, staff with time and energy).

Additional limiting factors were described at the boundaries and intersections between organisations, professions, sectors and cultures; a lack of structural support beyond the start-up phase; and staff burnout and turnover.

Within healthcare services, the issue of diffusion and sustainability of innovation has received widespread academic attention pioneered by Greenhalgh et al.<sup>22</sup> who drew on Rogers' seminal text on Diffusion of Innovations<sup>23</sup>. There have been many subsequent notable academic contributions<sup>24-28</sup>. Nilsen proposed an overarching framework of healthcare implementation theories according to the aim of the theory<sup>29</sup>. Theories such as those about innovation sustainability, which include the Diffusion of Innovation theory, were categorised as "determinant frameworks", as they posit general types of factors that can influence the success of an innovation. We believe that our findings contribute through empirical evidence to theoretical development at this level, and thus may have wider implications than programme-level data would normally allow. According to Nilsen, such theories have typically been analysed and formulated across individual studies, at the level of meta-analysis or review<sup>29</sup> and may therefore be one or more steps removed from the underlying data. This study is different in that we have developed mid-range theory that is empirically grounded in programme-level data, and there is a clear line between our data and the generated theory.

1  
2  
3 Conceptions of innovation success tend to focus on sustainability<sup>30</sup> and scale-up<sup>24</sup>. We suggest that  
4 both are contingent on the ability of an innovation to provide value to its intended beneficiaries in  
5 the first place. There are few theories grounded in empirical data that explain this dimension of  
6 success. Our findings highlight the importance of patient, public and practitioner involvement,  
7 alongside the core success factors of leadership and collaborative expertise. We suggest that these  
8 are fundamental preceding factors to either sustainability or scale-up.  
9

10  
11 This 'value for intended beneficiaries' dimension of success also allows us to conceptualise a  
12 valuable innovation that is not growing or expanding. This, we argue, is important: healthcare  
13 innovations may have parameters within which growth and expansion are constrained, perhaps  
14 because their aims have been achieved, or because the context changes. An innovation that has met  
15 its aims but has not expanded beyond its natural boundary should be properly positioned as such.  
16  
17

18  
19 Our ability to research a set of potentially valuable projects that were scaled down or stopped, many  
20 of which never reach the literature, may have afforded novel insights. Fixsen suggests that  
21 sustainability can only be asserted when the funding to support implementation is withdrawn<sup>31</sup>.  
22 Stirman's systematic review suggests sustainability can be asserted after a period of two years<sup>32</sup>.  
23 Our findings suggest that continued structural support, particularly organisational, administrative  
24 and educational support, may be critical to a project's sustainability and scalability, and that their  
25 withdrawal may destroy potentially valuable innovations.  
26  
27

28  
29 Finally, our findings further validate the work of Dopson and Fitzgerald<sup>33</sup>, whose qualitative  
30 exploration of a similar set of health service innovations highlighted the importance of context and  
31 process over content: it is not so much *what* you are trying to achieve, it is *how* you do it and the  
32 organisational and interpersonal contexts that you work within that matter.  
33  
34

35  
36 A limitation of this research is its highly contextual nature. Our results may not be generalisable to  
37 all contexts, however repeating these methods may produce locally relevant results. The analysis of  
38 variance depends on the universe of potential factors having been correctly identified and a large  
39 enough number of innovations to produce statistical significance. The research could be improved  
40 by more extensive validation of factors, patient and public involvement, further testing the  
41 directionality of tentative factors, a greater geographical spread, and a greater number of projects to  
42 allow for finer grading across the expansion axis.  
43  
44  
45  
46  
47  
48  
49  
50  
51  
52  
53  
54  
55  
56  
57  
58  
59  
60

## Conclusions

Our findings suggest that organisations and policy makers wishing to support service-level innovation in similar healthcare contexts address the factors identified through this research as critical to success.

Such strategies might include:

- supporting innovators with the right skills and expertise, including leadership skills, implementation support and evaluation expertise;
- innovation networks to provide opportunities to showcase success and provide a peer community of expertise and support;
- emphasising participatory practices and collaborative approaches, so that innovations are more likely to align to societal and organisation goals and generate value for patients, communities and practitioners;
- providing administrative and educational support during the scale-up phase, and ensuring that this support is maintained or handed over rather than withdrawn to schedule;
- recognising and enhancing the internal motivation and drive of innovators as well as more goal-oriented motivations such as career needs.

At a structural level, the boundaries between organisations, professions, and the health and social care sectors may need to be addressed as potential barriers to successful innovation.

More research is needed to confirm whether addressing these factors prospectively enhances the success of future innovations.

## Contributorship statement

KLG and GR contributed to the conception and design of the work and to the acquisition of data.

KLG, GR and AK collaborated on the data analysis and interpretation. KLG and AK drafted the work, all authors revised it critically for important intellectual content. All authors have approved the final version and agree to be accountable for all aspects of the work and to resolve questions relating to accuracy or integrity.

## Competing interests

There are no competing interests.

## Funding

This work was funded by Health Education England, grant number XXMLIVESEY.

## Data sharing statement

Due to the highly individual nature of healthcare innovations and the limited geographic area of this study, we are unable to provide our raw data. We undertake to provide a redacted data set upon reasonable request.

## Supplementary data

Full text survey

## Acknowledgements

We would like to thank Josh Brewster from the Health Innovation Network and Sian Kitchen from Health Education England for their commitment to this project, and Prof Sue Smith from the Medical Education Research Unit of Imperial College for ongoing support and advice.

## Figure legends

### Figure 1: Research overview

Legend: A mixed-methods sequential research process to explore and explain success factors and limiting factors in health service innovation.

### Figure 2: Survey scope

Legend: The survey scope was based on a qualitative review of theories and findings relating to the sustainability and scale-up of health service innovations (Lennox et al, 2018) supplemented by five scoping interviews. The questions are listed in table 1, and the full text survey is in the supplementary material.

### Figure 3: Framework for categorisation of success within health service innovation

Legend: Health service innovations were categorised across two dimensions of success through an inductive classification process. The horizontal axis relates to how successful innovations were in realising their intended value: "did it create more or less than its intended value for beneficiaries?" The vertical axis relates to expansion: "was the innovation scaled up or scaled down from the original pilot?" Numbers in brackets indicate how many innovations were found in each category.

### Figure 4: Critical success factors plotted according to their salience to success

Legend: Critical success factors plotted according to their significance to success on a natural logarithmic scale so that factors above and to the right of the dotted line have significance  $\geq 0.05$ . The expansion axis indicates significance to whether a project is scaled up or down beyond the original pilot. The value creation axis indicates significance as to whether it creates more or less than its intended value for beneficiaries.

### Figure 5: Nested hierarchy of success factors and limiting factors for health service innovation

Legend: Factors that may be significant to both value generation for the intended beneficiaries *and* to whether the innovation is scaled up beyond the original pilot are labelled as core needs. Factors that may be significant specifically to value generation are the next priority (middle layer) as innovations that do not generate value

1  
2  
3  
4  
5  
6  
7  
8  
9  
10  
11  
12  
13  
14  
15  
16  
17  
18  
19  
20  
21  
22  
23  
24  
25  
26  
27  
28  
29  
30  
31  
32  
33  
34  
35  
36  
37  
38  
39  
40  
41  
42  
43  
44  
45  
46  
47  
48  
49  
50  
51  
52  
53  
54  
55  
56  
57  
58  
59  
60

will not become embedded or spread. Finally, factors that may primarily be significant to expansion are presented in the outermost layer. Additional limiting factors were identified through an inductive analysis of qualitative responses from projects that had scaled down or failed to produce their intended value.

For peer review only



## References

1. Chang AY, Cowling K, Micah AE, et al. Past, present, and future of global health financing: a review of development assistance, government, out-of-pocket, and other private spending on health for 195 countries, 1995–2050. *The Lancet* 2019;393(10187):2233-60. doi: 10.1016/S0140-6736(19)30841-4
2. Crisp N. What would a sustainable health and care system look like? *BMJ* 2017;358:j3895. doi: 10.1136/bmj.j3895
3. Nolte E. How do we ensure that innovation in health service delivery and organization is implemented, sustained and spread?: World Health Organization, 2018:p7.
4. Bornmann L, Haunschild R. Societal Impact Measurement of Research Papers. In: Glänzel W, Moed HF, Schmoch U, et al., eds. *Springer Handbook of Science and Technology Indicators*. Cham: Springer International Publishing 2019:609-32.
5. Pury EF, Davide N, Jean L, et al. NHS top managers, knowledge exchange and leadership: the early development of Academic Health Science Networks – a mixed-methods study. 2017 doi: <https://www.ncbi.nlm.nih.gov/books/NBK436464/>
6. Davidoff F, Dixon-Woods M, Leviton L, et al. Demystifying theory and its use in improvement. *BMJ Qual Saf* 2015;24(3):228-38. doi: 10.1136/bmjqs-2014-003627 [published Online First: 2015/01/27]
7. McCulloch P, Altman DG, Campbell WB, et al. No surgical innovation without evaluation: the IDEAL recommendations. *The Lancet* 2009;374(9695):1105-12.
8. Bogna F, Raineri A, Dell G. Critical realism and constructivism: merging research paradigms for a deeper qualitative study. *Qualitative Research in Organizations and Management: An International Journal* 2020;15(4):461-84. doi: 10.1108/QROM-06-2019-1778
9. Varpio L, Paradis E, Uijtdehaage S, et al. The Distinctions Between Theory, Theoretical Framework, and Conceptual Framework. *Acad Med* 2020;95(7):989-94. doi: 10.1097/acm.0000000000003075 [published Online First: 2019/11/15]
10. Creswell JW, Plano Clark VL, Gutmann ML, et al. Advanced mixed methods research designs. *Handbook of mixed methods in social and behavioral research* 2003;209:240.
11. Saunders B, Sim J, Kingstone T, et al. Saturation in qualitative research: exploring its conceptualization and operationalization. *Quality & Quantity* 2018;52(4):1893-907. doi: 10.1007/s11135-017-0574-8
12. Lennox L, Maher L, Reed J. Navigating the sustainability landscape: a systematic review of sustainability approaches in healthcare. *Implementation Science* 2018;13 doi: 10.1186/s13012-017-0707-4
13. Creswell JW, Hirose M. Mixed methods and survey research in family medicine and community health. *Family Medicine and Community Health* 2019;7(2):e000086. doi: 10.1136/fmch-2018-000086
14. Charmaz K. *Constructing grounded theory: a practical guide through qualitative analysis*. London: Sage 2006.
15. Jebb AT, Parrigon S, Woo SE. Exploratory data analysis as a foundation of inductive research. *Human Resource Management Review* 2017;27(2):265-76. doi: <https://doi.org/10.1016/j.hrmr.2016.08.003>
16. Hecke TV. Power study of anova versus Kruskal-Wallis test. *Journal of Statistics and Management Systems* 2012;15(2-3):241-47. doi: 10.1080/09720510.2012.10701623
17. Poots AJ, Reed JE, Woodcock T, et al. How to attribute causality in quality improvement: lessons from epidemiology. *BMJ Quality & Safety* 2017;26(11):933. doi: 10.1136/bmjqs-2017-006756
18. Braun V, Clarke V. Thematic analysis. *APA handbook of research methods in psychology, Vol 2: Research designs: Quantitative, qualitative, neuropsychological, and biological*. Washington, DC, US: American Psychological Association 2012:57-71.

19. The Health Innovation Network. Health Innovation Network - Our Projects 2021 [Available from: <https://healthinnovationnetwork.com/our-projects/> accessed 26/03/2021 2021.
20. The King's Fund. Key facts and figures about adult social care 2019 [Available from: <https://www.kingsfund.org.uk/audio-video/key-facts-figures-adult-social-care> accessed 12/12/2020.
21. Gadsby EW, Peckham S, Coleman A, et al. Commissioning for health improvement following the 2012 health and social care reforms in England: what has changed? *BMC public health* 2017;17(1):211-11. doi: 10.1186/s12889-017-4122-1
22. Greenhalgh T, Robert G, Bate P, et al. Diffusion of Innovations in Health Service Organisations: A Systematic Literature Review: Wiley 2008.
23. Rogers EM. Diffusion of innovations. New York: Free Press of Glencoe 1962.
24. Greenhalgh T, Robert G, Macfarlane F, et al. Diffusion of innovations in service organizations: systematic review and recommendations. *Milbank Q* 2004;82(4):581-629. doi: 10.1111/j.0887-378X.2004.00325.x [published Online First: 2004/12/15]
25. Kitson AL, Rycroft-Malone J, Harvey G, et al. Evaluating the successful implementation of evidence into practice using the PARIHS framework: theoretical and practical challenges. *Implement Sci* 2008;3:1. doi: 10.1186/1748-5908-3-1 [published Online First: 2008/01/09]
26. Damschroder LJ, Aron DC, Keith RE, et al. Fostering implementation of health services research findings into practice: a consolidated framework for advancing implementation science. *Implement Sci* 2009;4:50. doi: 10.1186/1748-5908-4-50 [published Online First: 2009/08/12]
27. Aarons GA, Hurlburt M, Horwitz SM. Advancing a conceptual model of evidence-based practice implementation in public service sectors. *Administration and policy in mental health* 2011;38(1):4-23. doi: 10.1007/s10488-010-0327-7 [published Online First: 2011/01/05]
28. Nolte E. How do we ensure that innovation in health service delivery and organization is implemented, sustained and spread? *World Health Organization* 2018
29. Nilsen P. Making sense of implementation theories, models and frameworks. *Implement Sci* 2015;10:53. doi: 10.1186/s13012-015-0242-0 [published Online First: 2015/04/22]
30. Moore JE, Mascarenhas A, Bain J, et al. Developing a comprehensive definition of sustainability. *Implement Sci* 2017;12 doi: 10.1186/s13012-017-0637-1
31. Fixsen DL, Naoom SF, Blase KA, et al. Implementation research: A synthesis of the literature. 2005
32. Stirman SW, Kimberly J, Cook N, et al. The sustainability of new programs and innovations: a review of the empirical literature and recommendations for future research. *Implementation Science* 2012;7:19. doi: 10.1186/1748-5908-7-17
33. Dopson S, Fitzgerald L, Ferlie E. Understanding Change and Innovation in Healthcare Settings: Reconceptualizing the Active Role of Context. *Journal of Change Management* 2008;8(3-4):213-31. doi: 10.1080/14697010802133577

**Table 1: Analysis of variance of potential success factors across categories of success**

|    | Factor                                                                                                                                      | Average answer across all categories* | Distribution of factor is the same across categories of expansion (proven value) | Distribution of factor is the same across categories of expansion (all) | Distribution of factor is the same across categories of realised value | Interpretation and comment on secondary analysis***                                  |
|----|---------------------------------------------------------------------------------------------------------------------------------------------|---------------------------------------|----------------------------------------------------------------------------------|-------------------------------------------------------------------------|------------------------------------------------------------------------|--------------------------------------------------------------------------------------|
|    |                                                                                                                                             |                                       | Sig.**                                                                           | Sig.**                                                                  | Sig.**                                                                 |                                                                                      |
| 1  | The initiative was designed to end once a set outcome had been achieved                                                                     | ↘ -0.40                               | 0.274                                                                            | 0.172                                                                   | 0.317                                                                  |                                                                                      |
| 2  | The initiative was designed to end after defined period of time                                                                             | ↘ -0.58                               | 0.011                                                                            | 0.011                                                                   | 0.288                                                                  | Unsurprisingly, even projects with high realised value finish if they are time-bound |
| 3  | The initiative was designed to address an important healthcare need                                                                         | ↑ 1.63                                | 0.765                                                                            | 0.712                                                                   | 0.135                                                                  |                                                                                      |
| 4  | There was public/political recognition and concern for the problem that the initiative was designed to address                              | ↑ 1.23                                | 0.939                                                                            | 0.66                                                                    | 0.201                                                                  |                                                                                      |
| 5  | The initiative was based on a strong evidence base, and it was credible that the stated benefits could be achieved through the project plan | ↑ 1.35                                | 0.696                                                                            | 0.355                                                                   | 0.299                                                                  |                                                                                      |
| 6  | The project was sufficiently funded                                                                                                         | ↗ 1.17                                | 0.941                                                                            | 0.454                                                                   | 0.126                                                                  |                                                                                      |
| 7  | The project had sufficient infrastructure, such as buildings, office space, materials or supplies                                           | ↑ 1.52                                | 0.952                                                                            | 0.842                                                                   | 0.613                                                                  |                                                                                      |
| 8  | There were sufficient members of staff with the right skills to meet the requirements of the initiative                                     | ↑ 1.42                                | 0.003                                                                            | 0.002                                                                   | 0.013                                                                  | Skilled workforce is a critical success factor across all definitions of success     |
| 9  | Members of staff had sufficient energy and time to dedicate to the initiative                                                               | ↑ 1.21                                | 0.033                                                                            | 0.085                                                                   | 0.362                                                                  | Time and energy are critical to whether proven innovations expand                    |
| 10 | There was sufficient administrative support to deliver and maintain the initiative                                                          | ↗ 0.85                                | 0.013                                                                            | 0.019                                                                   | 0.142                                                                  | Administrative support is critical to whether an innovation expands                  |
| 11 | There was sufficient technical support to deliver and maintain the initiative                                                               | ↗ 1.04                                | 0.113                                                                            | 0.187                                                                   | 0.657                                                                  |                                                                                      |

|    | Factor                                                                                                                                  | Average answer across all categories* | Distribution of factor is the same across categories of expansion (proven value) | Distribution of factor is the same across categories of expansion (all) | Distribution of factor is the same across categories of realised value | Interpretation and comment on secondary analysis***                                                                                                    |
|----|-----------------------------------------------------------------------------------------------------------------------------------------|---------------------------------------|----------------------------------------------------------------------------------|-------------------------------------------------------------------------|------------------------------------------------------------------------|--------------------------------------------------------------------------------------------------------------------------------------------------------|
|    |                                                                                                                                         |                                       | Sig.**                                                                           | Sig.**                                                                  | Sig.**                                                                 |                                                                                                                                                        |
| 12 | There was sufficient educational support to deliver and maintain the initiative                                                         | ↑ 1.30                                | 0.023                                                                            | 0.012                                                                   | 0.089                                                                  | Educational support is critical to whether an innovation expands                                                                                       |
| 13 | External political or societal factors impacted negatively on the delivery of the initiative                                            | ↘ -0.91                               | 0.191                                                                            | 0.141                                                                   | 0.005                                                                  | External political or societal factors appear critical to whether an innovation is able to realise its intended value (inconsistent exposure/response) |
| 14 | It was necessary to adapt the project so that it aligned more closely with external political or societal priorities                    | ↘ -0.72                               | 0.541                                                                            | 0.252                                                                   | 0.064                                                                  |                                                                                                                                                        |
| 15 | We had opportunities to demonstrate the benefits of this innovation within our organisation and/or to other organisations               | ↑ 1.59                                | 0.237                                                                            | 0.053                                                                   | 0.02                                                                   | Unsurprisingly innovations that were able to realise their intended value, were more likely to be able to demonstrate the benefits of their innovation |
| 16 | Steps were taken to raise the profile of the initiative e.g. through media, marketing, community engagement or publications             | ↗ 0.85                                | 0.108                                                                            | 0.059                                                                   | 0.306                                                                  |                                                                                                                                                        |
| 17 | There are plans to replicate this innovation at other sites or spread it to other parts of the organisation                             | ↗ 0.58                                | 0.024                                                                            | 0.012                                                                   | 0.228                                                                  | Unsurprisingly, innovations that have become scaled up were more likely to say there were plans to spread their innovation                             |
| 18 | The initiative integrated well into existing organisational structures, programmes or policies                                          | ↑ 1.26                                | 0.012                                                                            | 0.002                                                                   | 0.059                                                                  | The ability of an innovation to integrate into existing organisational structures may be critical to whether it becomes scaled up                      |
| 19 | It was necessary to adapt the initiative so that it achieved a good fit with existing organisational structures, programmes or policies | → -0.09                               | 0.053                                                                            | 0.035                                                                   | 0.115                                                                  | For innovations to scale up, they may need to adapt so that they fit within existing organisational structures.                                        |
| 20 | The host organisation was ready and able to undertake the initiative                                                                    | ↑ 1.55                                | 0.262                                                                            | 0.168                                                                   | 0.721                                                                  |                                                                                                                                                        |

|    | Factor                                                                                          | Average answer across all categories* | Distribution of factor is the same across categories of expansion (proven value) | Distribution of factor is the same across categories of expansion (all) | Distribution of factor is the same across categories of realised value | Interpretation and comment on secondary analysis***                                                                       |
|----|-------------------------------------------------------------------------------------------------|---------------------------------------|----------------------------------------------------------------------------------|-------------------------------------------------------------------------|------------------------------------------------------------------------|---------------------------------------------------------------------------------------------------------------------------|
|    |                                                                                                 |                                       | Sig.**                                                                           | Sig.**                                                                  | Sig.**                                                                 |                                                                                                                           |
| 21 | The initiative was hampered by opposition from within the host organisation                     | ↓ -1.50                               | 0.037                                                                            | 0.027                                                                   | 0.398                                                                  | However valuable an innovation is, it appears unlikely to survive if it is opposed within the host organisation.          |
| 22 | The host organisation lacked the necessary values/culture to support and sustain the initiative | ↓ -1.17                               | 0.265                                                                            | 0.247                                                                   | 0.888                                                                  |                                                                                                                           |
| 23 | I was released from other duties so that I could implement this initiative                      | ↘ -0.43                               | 0.732                                                                            | 0.893                                                                   | 0.789                                                                  |                                                                                                                           |
| 24 | I had a supportive peer network that I could discuss any issues or problems with                | ↑ 1.32                                | 0.385                                                                            | 0.562                                                                   | 0.79                                                                   |                                                                                                                           |
| 25 | I was internally motivated to implement this initiative                                         | ↑ 1.81                                | 0.425                                                                            | 0.129                                                                   | 0.034                                                                  | Innovations appear more likely to realise their value if the innovator is internally motivated                            |
| 26 | I found working on the initiative personally rewarding                                          | ↑ 1.81                                | 0.147                                                                            | 0.067                                                                   | 0.022                                                                  | Unsurprisingly, there is a correlation between an innovation realising its value, and the innovator finding it rewarding. |
| 27 | I feel I had the right skills/experience/training to implement and sustain the initiative       | ↑ 1.62                                | 0.033                                                                            | 0.008                                                                   | 0.023                                                                  | The skills of the innovator appear to be a critical success factor across all definitions of success.                     |
| 28 | I had sufficient energy and time to dedicate to the initiative                                  | ↗ 1.06                                | 0.209                                                                            | 0.268                                                                   | 0.498                                                                  |                                                                                                                           |
| 29 | The project had sufficient input from experts with the necessary knowledge and experience       | ↑ 1.66                                | 0.134                                                                            | 0.018                                                                   | 0.021                                                                  | Expert input appears critical to both realisation of value, and to whether it expands.                                    |
| 30 | The outcomes and impact of the project were measured or assessed                                | ↑ 1.37                                | 0.060                                                                            | 0.125                                                                   | 0.119                                                                  |                                                                                                                           |

|    | Factor                                                                                           | Average answer across all categories* | Distribution of factor is the same across categories of expansion (proven value) | Distribution of factor is the same across categories of expansion (all) | Distribution of factor is the same across categories of realised value | Interpretation and comment on secondary analysis***                                                                                                          |
|----|--------------------------------------------------------------------------------------------------|---------------------------------------|----------------------------------------------------------------------------------|-------------------------------------------------------------------------|------------------------------------------------------------------------|--------------------------------------------------------------------------------------------------------------------------------------------------------------|
|    |                                                                                                  |                                       | Sig.**                                                                           | Sig.**                                                                  | Sig.**                                                                 |                                                                                                                                                              |
| 31 | We were able to demonstrate the effectiveness of the project                                     | ↑ 1.38                                | 0.463                                                                            | 0.185                                                                   | <b>0.015</b>                                                           | Unsurprisingly innovations that were able to realise their intended value, were more likely to be able to demonstrate the effectiveness of their innovation. |
| 32 | Performance data was gathered and reported on a regular basis                                    | ↗ 1.04                                | 0.346                                                                            | 0.266                                                                   | 0.159                                                                  |                                                                                                                                                              |
| 33 | Steps were taken to systematically improve and adapt the project                                 | ↑ 1.44                                | 0.293                                                                            | 0.153                                                                   | 0.377                                                                  |                                                                                                                                                              |
| 34 | There was ongoing orientation and training available e.g. to new staff or to build capacity      | ↗ 0.87                                | <b>0.034</b>                                                                     | <b>0.03</b>                                                             | 0.153                                                                  | The availability of ongoing training may be critical to whether successful innovations scale up                                                              |
| 35 | Staff were given time/incentives to attend the necessary training                                | → 0.47                                | 0.096                                                                            | 0.159                                                                   | 0.178                                                                  |                                                                                                                                                              |
| 36 | Staff were required to attend the necessary training                                             | → 0.11                                | 0.348                                                                            | 0.271                                                                   | 0.767                                                                  |                                                                                                                                                              |
| 37 | The initiative was difficult or complex to deliver                                               | → -0.09                               | 0.294                                                                            | 0.163                                                                   | 0.158                                                                  |                                                                                                                                                              |
| 38 | The initiative helped to make things easier or more efficient                                    | ↗ 0.76                                | 0.86                                                                             | 0.953                                                                   | 0.182                                                                  |                                                                                                                                                              |
| 39 | The initiative did not require special or extra effort                                           | ↓ -1.09                               | 0.979                                                                            | 0.869                                                                   | 0.597                                                                  |                                                                                                                                                              |
| 40 | I believe that the staff delivering the initiative found the work/tasks rewarding and satisfying | ↑ 1.59                                | 0.368                                                                            | 0.456                                                                   | 0.743                                                                  |                                                                                                                                                              |
| 41 | The project team worked well together                                                            | ↑ 1.74                                | 0.416                                                                            | 0.796                                                                   | 0.893                                                                  |                                                                                                                                                              |
| 42 | There were clear responsibilities for individuals the work was shared across the team            | ↑ 1.45                                | 0.945                                                                            | 0.533                                                                   | <b>0.066</b>                                                           |                                                                                                                                                              |
| 43 | Project was overly dependent on a particular individual or individuals                           | ↗ 0.57                                | 0.708                                                                            | 0.355                                                                   | 0.29                                                                   |                                                                                                                                                              |



|    | Factor                                                                                                                              | Average answer across all categories* | Distribution of factor is the same across categories of expansion (proven value) | Distribution of factor is the same across categories of expansion (all) | Distribution of factor is the same across categories of realised value | Interpretation and comment on secondary analysis***                                                                                                                          |
|----|-------------------------------------------------------------------------------------------------------------------------------------|---------------------------------------|----------------------------------------------------------------------------------|-------------------------------------------------------------------------|------------------------------------------------------------------------|------------------------------------------------------------------------------------------------------------------------------------------------------------------------------|
|    |                                                                                                                                     |                                       | Sig.**                                                                           | Sig.**                                                                  | Sig.**                                                                 |                                                                                                                                                                              |
| 44 | I believe that the team understood what the project was trying to achieve and that it would lead to improved processes and outcomes | ↑ 1.62                                | 0.218                                                                            | 0.165                                                                   | 0.772                                                                  |                                                                                                                                                                              |
| 45 | There were rewards or incentives that supported engagement with, and continued delivery of, the initiative                          | → 0.07                                | 0.45                                                                             | 0.638                                                                   | 0.228                                                                  |                                                                                                                                                                              |
| 46 | The activities and roles of the initiative were incorporated into job descriptions                                                  | ↓ -0.30                               | 0.29                                                                             | 0.243                                                                   | 0.141                                                                  |                                                                                                                                                                              |
| 47 | Staff had time within their working hours to complete the tasks of the initiative                                                   | ↗ 0.59                                | 0.251                                                                            | 0.138                                                                   | 0.328                                                                  |                                                                                                                                                                              |
| 48 | The initiative had leadership and/or champions who were committed and capable                                                       | ↑ 1.62                                | <b>0.003</b>                                                                     | <b>0.001</b>                                                            | <b>0.006</b>                                                           | Leadership appears to be a highly significant success factor across all definitions of success.                                                                              |
| 49 | There was an appropriate balance of power between those involved with the initiative                                                | ↗ 1.15                                | 0.697                                                                            | 0.775                                                                   | 0.929                                                                  |                                                                                                                                                                              |
| 50 | Team members were able to express their opinions, and their opinions were valued                                                    | ↑ 1.91                                | <b>1 (no variance)</b>                                                           | <b>0.049</b>                                                            | <b>0.026</b>                                                           | Distributed decision making may be a critical success factor across all definitions of success. It was common to all innovations of value that scaled up (hence no variance) |
| 51 | There was a sense of ownership and commitment by those involved with the initiative                                                 | ↑ 1.79                                | 0.284                                                                            | 0.177                                                                   | 0.102                                                                  |                                                                                                                                                                              |
| 52 | Staff who were responsible for delivering the initiative were involved as partners, and were able to shape the initiative           | ↑ 1.74                                | 0.306                                                                            | 0.176                                                                   | <b>0.031</b>                                                           | Participatory processes with staff may be critical to the ability of a project to realise its intended value.                                                                |

|    | Factor                                                                                                                  | Average answer across all categories* | Distribution of factor is the same across categories of expansion (proven value) | Distribution of factor is the same across categories of expansion (all) | Distribution of factor is the same across categories of realised value | Interpretation and comment on secondary analysis***                                                                                      |
|----|-------------------------------------------------------------------------------------------------------------------------|---------------------------------------|----------------------------------------------------------------------------------|-------------------------------------------------------------------------|------------------------------------------------------------------------|------------------------------------------------------------------------------------------------------------------------------------------|
|    |                                                                                                                         |                                       | Sig.**                                                                           | Sig.**                                                                  | Sig.**                                                                 |                                                                                                                                          |
| 53 | The beneficiaries (patients/service users) were involved as partners, and were able to shape the initiative             | ↗ 0.83                                | 0.45                                                                             | 0.139                                                                   | <b>0.027</b>                                                           | Participatory processes with patients/service users may be critical to the ability of a project to realise its intended value.           |
| 54 | The community in which it was situated were involved as partners, and were able to shape the initiative                 | ↗ 0.96                                | 0.177                                                                            | <b>0.034</b>                                                            | <b>0.023</b>                                                           | Participatory processes on a community level may be critical to both the ability of a project to realise its value, and its scalability. |
| 55 | There was a collaborative network of people/organisations that helped to support and sustain the initiative             | ↑ 1.30                                | <b>0.008</b>                                                                     | <b>0.007</b>                                                            | <b>0.003</b>                                                           | The support of a collaborative network of people/organisation may be highly significant to both value creation and scalability.          |
| 56 | It felt as though the initiative was imposed on us and there was little sense of ownership or commitment to the project | ↓ -1.64                               | 0.684                                                                            | 0.488                                                                   | 0.326                                                                  |                                                                                                                                          |

Foot note to table 1: Analysis of variance of potential success factors across categories of success

\* Respondents on average ↑= agree, ↗=somewhat agree, →=neither agree not disagree, ↘= somewhat disagree, ↓=disagree

\*\* Asymptotic significances are displayed. The significance level is 0.05.

The darker the shading, the safer it is to reject the null hypothesis. Sig <0.05 indicates >95% certainty that the difference between categories is not random.

\*\*\* Secondary analysis examined the direction of the association and the strength of effect across categories of success.



**Table 2: Factors that are significantly associated with innovation success with illustrative quotes**

| Significant factors by theme (significant to value or expansion)                                                                                                                                                                                                                                                                                                                                                                                                                                                                                      | Illustrative quotes                                                                                                                                                                                                                                                                                                                                                                                                                                                                                                                                                                                                                                                                                                                                             |
|-------------------------------------------------------------------------------------------------------------------------------------------------------------------------------------------------------------------------------------------------------------------------------------------------------------------------------------------------------------------------------------------------------------------------------------------------------------------------------------------------------------------------------------------------------|-----------------------------------------------------------------------------------------------------------------------------------------------------------------------------------------------------------------------------------------------------------------------------------------------------------------------------------------------------------------------------------------------------------------------------------------------------------------------------------------------------------------------------------------------------------------------------------------------------------------------------------------------------------------------------------------------------------------------------------------------------------------|
| Theme 1: Project aims                                                                                                                                                                                                                                                                                                                                                                                                                                                                                                                                 | None of the factors related to the aims of the project were significant                                                                                                                                                                                                                                                                                                                                                                                                                                                                                                                                                                                                                                                                                         |
| Theme 2: Resources & support <ul style="list-style-type: none"> <li>• There were sufficient members of staff with the right skills to meet the requirements of the initiative (significant to expansion &amp; value)</li> <li>• Members of staff had sufficient energy and time to dedicate to the initiative (expansion)</li> <li>• There was sufficient administrative support to deliver and maintain the initiative (expansion)</li> <li>• There was sufficient educational support to deliver and maintain the initiative (expansion)</li> </ul> | <p>“The programme support sat with one individual rather than a team and as highlighted previously the administrative/programme support hadn't been entirely appreciated/factored in at the outset of the programme.” R16</p> <p>“There are innovators out there who are doing things on their own, and the person I'm thinking about is not in a very good place. He's got virtually no support, and I don't know how he does it.” F12</p> <p>“The resources needed in terms of administration and support were underestimated. We input far more time and admin resources than originally planned.” R15</p> <p>“The envelope of funding available did not enable us to fully develop a training package which was what we had initially hoped to do.” R25</p> |
| Theme 3: How the project interfaced externally <ul style="list-style-type: none"> <li>• External political or societal factors impacted negatively on the delivery of the initiative (value, scored negatively)</li> <li>• We had opportunities to demonstrate the benefits of this innovation within our organisation and/or to other organisations (value)</li> </ul>                                                                                                                                                                               | <p>“The project piggy-backed on the current social movement highlighting the needs of mental health.” R18</p> <p>“Hearing has always been the poor relation to other health issues even though everyone knows someone struggles with their hearing either family or friends.” R35</p>                                                                                                                                                                                                                                                                                                                                                                                                                                                                           |
| Theme 4: Organisational factors <ul style="list-style-type: none"> <li>• The initiative integrated well into existing organisational structures, programmes or policies (expansion)</li> <li>• The initiative was hampered by opposition from within the host organisation (expansion)</li> </ul>                                                                                                                                                                                                                                                     | <p>“The project was presented in [area] Council, [area] NHS Trust, to the public health team in the council and the voluntary sector in [area]. It was aligned with local priorities and local initiatives. A journal article is being drafted.” R13</p> <p>“There was also a disconnect between commissioner priorities &amp; [the host organisation's] priorities in relation to the programme, which impacted on its sustainability &amp; roll-out.” R16</p>                                                                                                                                                                                                                                                                                                 |

|                                                                                                                                                                                                                                                                                                                                                                                                                                 |                                                                                                                                                                                                                                                                                                                                                                                                                                                                                                                                                                                                                                                                                                                                                                                                                                                       |
|---------------------------------------------------------------------------------------------------------------------------------------------------------------------------------------------------------------------------------------------------------------------------------------------------------------------------------------------------------------------------------------------------------------------------------|-------------------------------------------------------------------------------------------------------------------------------------------------------------------------------------------------------------------------------------------------------------------------------------------------------------------------------------------------------------------------------------------------------------------------------------------------------------------------------------------------------------------------------------------------------------------------------------------------------------------------------------------------------------------------------------------------------------------------------------------------------------------------------------------------------------------------------------------------------|
| <p>Theme 5: Personal factors</p> <ul style="list-style-type: none"> <li>• I was internally motivated to implement this initiative (value)</li> <li>• I found working on the initiative personally rewarding (value)</li> <li>• I feel I had the right skills/experience/training to implement and sustain the initiative (expansion &amp; value)</li> </ul>                                                                     | <p>“I was very motivated to implement this project which was demanding as I had no protected time for it. Nonetheless, you do what is needed to achieve a goal.” R18</p> <p>“I am very proud of our achievements and that the work has become a routine part of our culture and system of working” R28</p> <p>“On reflection I needed to lead this project more strongly. I tried to be facilitative and not prescriptive, but the staff were not experienced enough to utilise this opportunity. They needed more direction and support. There was some conflict between the educators and the substantive staff.” R10</p>                                                                                                                                                                                                                           |
| <p>Theme 6: Project management</p> <ul style="list-style-type: none"> <li>• The project had sufficient input from experts with the necessary knowledge and experience (value)</li> <li>• We were able to demonstrate the effectiveness of the project (value)</li> </ul>                                                                                                                                                        | <p>“As the project was run within [<i>university</i>] and [<i>tertiary hospital trust</i>], there was plenty of expertise to call upon as required.” R6</p> <p>“The ongoing reporting allowed for the results to be understood early in the project, shared and used in the strategy for delivering education across [<i>region</i>]” R5</p> <p>“A robust evaluation was undertaken of the programme, along with regular review points to inform adaptations/opportunities for improvement.” R16</p>                                                                                                                                                                                                                                                                                                                                                  |
| <p>Theme 7: Tasks of the project</p>                                                                                                                                                                                                                                                                                                                                                                                            | <p>No factors relating to the tasks of the project were significant</p>                                                                                                                                                                                                                                                                                                                                                                                                                                                                                                                                                                                                                                                                                                                                                                               |
| <p>Theme 8: Team processes</p> <ul style="list-style-type: none"> <li>• There was ongoing orientation and training available e.g. to new staff or to build capacity (expansion)</li> <li>• The initiative had leadership and/or champions who were committed and capable (expansion &amp; value)</li> <li>• Team members were able to express their opinions, and their opinions were valued (expansion &amp; value)</li> </ul> | <p>“We always express the value of our service users, administrator, and other members of the team and meet regularly to discuss well-being, progress, and evaluation.” R33</p> <p>“The team got on. It was a lovely team and dynamics. We all believed in the idea and were excited about it. Obviously the project needs expertise in [<i>technology</i>], so in that regard the work was dependent on the availability of such expertise within the team.”</p> <p>“Leadership hasn't been invested in providing the platform for the workshops &amp; curriculum to be rolled out. Lip service given by leadership.” R56</p> <p>“This programme was carried out by a team but lead by myself. Other parties lacked the time and incentive to commit to running and leading the programme after the 12 months of my time being project lead” R46</p> |

|                                                                                                                                                                                                                                                                                                                                                                                                                                                                                                                                                                                                                                                          |                                                                                                                                                                                                                                                                                                                                                                                                                                                                                                                                                                                                                                                                                                                                                                                                                                                                                                                                                                           |
|----------------------------------------------------------------------------------------------------------------------------------------------------------------------------------------------------------------------------------------------------------------------------------------------------------------------------------------------------------------------------------------------------------------------------------------------------------------------------------------------------------------------------------------------------------------------------------------------------------------------------------------------------------|---------------------------------------------------------------------------------------------------------------------------------------------------------------------------------------------------------------------------------------------------------------------------------------------------------------------------------------------------------------------------------------------------------------------------------------------------------------------------------------------------------------------------------------------------------------------------------------------------------------------------------------------------------------------------------------------------------------------------------------------------------------------------------------------------------------------------------------------------------------------------------------------------------------------------------------------------------------------------|
| <p>Theme 9: Collaborative and participatory practices</p> <ul style="list-style-type: none"> <li>• Staff who were responsible for delivering the initiative were involved as partners, and were able to shape the initiative (value)</li> <li>• The beneficiaries (patients/service users) were involved as partners, and were able to shape the initiative (value)</li> <li>• The community in which it was situated were involved as partners, and were able to shape the initiative (value)</li> <li>• There was a collaborative network of people/organisations that helped to support and sustain the initiative (expansion &amp; value)</li> </ul> | <p>“We've had some sort of service user involvement all the way through... that's really improved the way we've reflected and talked... it gives a genuineness to what we're trying to achieve... the fact that you go and work with the associates and carers, you actually go and look at the environment, you spend time with the nurses that you're going to be teaching and all the other people that you're working with, really helps to, you know, it definitely adds value to the project.” F13</p> <p>“There was a single practitioner using the resource on her own, and now it is nationally recognised... Without that level of support: the time, the people and the resources, we wouldn't have got anywhere. It's been a fantastic level of support. They designed an implementation toolkit to support practitioners embedding the programme locally.” F12</p> <p>“The team at the [<i>innovation network</i>] were fabulous and so supportive.” R12</p> |
|----------------------------------------------------------------------------------------------------------------------------------------------------------------------------------------------------------------------------------------------------------------------------------------------------------------------------------------------------------------------------------------------------------------------------------------------------------------------------------------------------------------------------------------------------------------------------------------------------------------------------------------------------------|---------------------------------------------------------------------------------------------------------------------------------------------------------------------------------------------------------------------------------------------------------------------------------------------------------------------------------------------------------------------------------------------------------------------------------------------------------------------------------------------------------------------------------------------------------------------------------------------------------------------------------------------------------------------------------------------------------------------------------------------------------------------------------------------------------------------------------------------------------------------------------------------------------------------------------------------------------------------------|

Footnote to table 2:

The nine themes and factors were derived from a qualitative review of the literature supplemented by stakeholder interviews. Significant factors were derived through a survey that explored salience of factors to outcomes. Survey respondents are indicated by R(n) and follow-up interview respondents by FI(n).

## Survey design

- Potential success factors identified through the literature and scoping interviews
- Survey invited innovators to
  - Rate each success factor
  - Provide insights into 9 themes
  - Categorise and describe their project's success

## Data generation

- Survey distributed to all 176 recipients of HIN awards, grants and bursaries
- 63 responses received, 7 rejected as incomplete or duplicate, 56 included in the analysis

## Quantitative analysis

- Innovations categorised according to value creation and expansion
- Variance of factors across categories of success calculated (Kruskal-Wallis H test on ranks)
- Secondary analysis of significant factors

## Qualitative analysis

- Success factors qualitatively illuminated
- Additional limiting factors identified inductively
- Insights checked back with stakeholders and data enriched by follow-up interviews

## Framework development

- Critical success factors plotted on 2x2 grid according to salience to outcomes
- Factors grouped into themes
- Clustering of themes within categories of success used to generate model
- Themes of limiting factors listed
- Checked back with stakeholders

|                                                                                                                                                                                                                                         |                                                                                                                                                                                                                                                                         |                                                                                                                                                                                                                                           |                                                                                                                                                                                                                                  |                                                                                                                                                                                                                                                               |                                                                                                                                                                                                                                                                                                                                     |                                                                                                                                                                                    |                                                                                                                                                                                                                                                                                                                                                                                                                   |                                                                                                                                                                                                                                                                                                |
|-----------------------------------------------------------------------------------------------------------------------------------------------------------------------------------------------------------------------------------------|-------------------------------------------------------------------------------------------------------------------------------------------------------------------------------------------------------------------------------------------------------------------------|-------------------------------------------------------------------------------------------------------------------------------------------------------------------------------------------------------------------------------------------|----------------------------------------------------------------------------------------------------------------------------------------------------------------------------------------------------------------------------------|---------------------------------------------------------------------------------------------------------------------------------------------------------------------------------------------------------------------------------------------------------------|-------------------------------------------------------------------------------------------------------------------------------------------------------------------------------------------------------------------------------------------------------------------------------------------------------------------------------------|------------------------------------------------------------------------------------------------------------------------------------------------------------------------------------|-------------------------------------------------------------------------------------------------------------------------------------------------------------------------------------------------------------------------------------------------------------------------------------------------------------------------------------------------------------------------------------------------------------------|------------------------------------------------------------------------------------------------------------------------------------------------------------------------------------------------------------------------------------------------------------------------------------------------|
|                                                                                                                                                          |                                                                                                                                                                                         |                                                                                                                                                           |                                                                                                                                                 |                                                                                                                                                                             |                                                                                                                                                                                                                                                   |                                                                                                  |                                                                                                                                                                                                                                                                                                                                 |                                                                                                                                                                                                              |
| <p>Project aims</p> <ul style="list-style-type: none"> <li>• Designed to address an important healthcare need</li> <li>• Public recognition and concern for the needed</li> <li>• Strong evidence based for the intervention</li> </ul> | <p>Resources</p> <ul style="list-style-type: none"> <li>• Funding</li> <li>• Infrastructure</li> <li>• Sufficient skilled staff</li> <li>• Staff with time &amp; energy</li> <li>• Admin support</li> <li>• Technical support</li> <li>• Educational support</li> </ul> | <p>External relations</p> <ul style="list-style-type: none"> <li>• Societal political fit</li> <li>• Adapted to fit social political agenda</li> <li>• Opportunities to demonstrate benefits</li> <li>• Active profile raising</li> </ul> | <p>Host organisation</p> <ul style="list-style-type: none"> <li>• Organisational fit</li> <li>• Adapted for organisational fit</li> <li>• Host capabilities</li> <li>• Host opposition</li> <li>• Host values/culture</li> </ul> | <p>Personal factors</p> <ul style="list-style-type: none"> <li>• Protected time</li> <li>• Peer support</li> <li>• Internal motivation</li> <li>• Project felt personally rewarding</li> <li>• Skills &amp; expertise</li> <li>• Time &amp; energy</li> </ul> | <p>Implementation factors</p> <ul style="list-style-type: none"> <li>• Expert input</li> <li>• Outcomes measured</li> <li>• Effectiveness demonstrated</li> <li>• Performance data reported</li> <li>• Systematic improvements</li> <li>• Ongoing training</li> <li>• Training incentivised</li> <li>• Training required</li> </ul> | <p>The work/tasks</p> <ul style="list-style-type: none"> <li>• Task difficulty</li> <li>• Made things easier</li> <li>• Made extra work</li> <li>• Tasks felt rewarding</li> </ul> | <p>Team factors</p> <ul style="list-style-type: none"> <li>• Team cohesion</li> <li>• Work shared</li> <li>• Dependent on an individual</li> <li>• Belief in project</li> <li>• Engagement incentivised</li> <li>• Roles in job descriptions</li> <li>• Tasks within working hours</li> <li>• Team leadership committed &amp; capable</li> <li>• Good balance of power</li> <li>• Team opinions valued</li> </ul> | <p>Participation</p> <ul style="list-style-type: none"> <li>• Stakeholder participation</li> <li>• Staff participation</li> <li>• Patient/service user participation</li> <li>• Community participation</li> <li>• Collaborative supportive network</li> <li>• Project felt imposed</li> </ul> |

Expanded beyond pilot

Sub-optimal outcome  
(low value project expanded)

Desirable outcome  
(high value project expanded)

|                                                       |                                               |                                                        |
|-------------------------------------------------------|-----------------------------------------------|--------------------------------------------------------|
| Lower than expected value, expanded beyond pilot (0)  | Value as expected, expanded beyond pilot (10) | Higher than expected value, expanded beyond pilot (13) |
| Lower than expected value, running at pilot scale (4) | Value as expected, running at pilot scale (8) | Higher than expected value, running at pilot scale (4) |
| Lower than expected value, scaled down or stopped (7) | Value as expected, scaled down or stopped (7) | Higher than expected value, scaled down or stopped (3) |

Low realised value

High realised value

Neutral outcome  
(low value project scaled down or stopped)

Sub-optimal outcome  
(high value project scaled down or stopped)

Scaled down or stopped

Was it sustained or scaled up beyond the pilot?

Did it create healthcare value for the intended beneficiaries?

1  
2  
3  
4  
5  
6  
7  
8  
9  
10  
11  
12  
13  
14  
15  
16  
17  
18  
19  
20  
21  
22  
23  
24  
25  
26  
27  
28  
29  
30  
31  
32  
33  
34  
35  
36  
37  
38  
39  
40  
41

# Significance of factors to value creation and expansion

# Significance to value creation and expansion of higher value projects

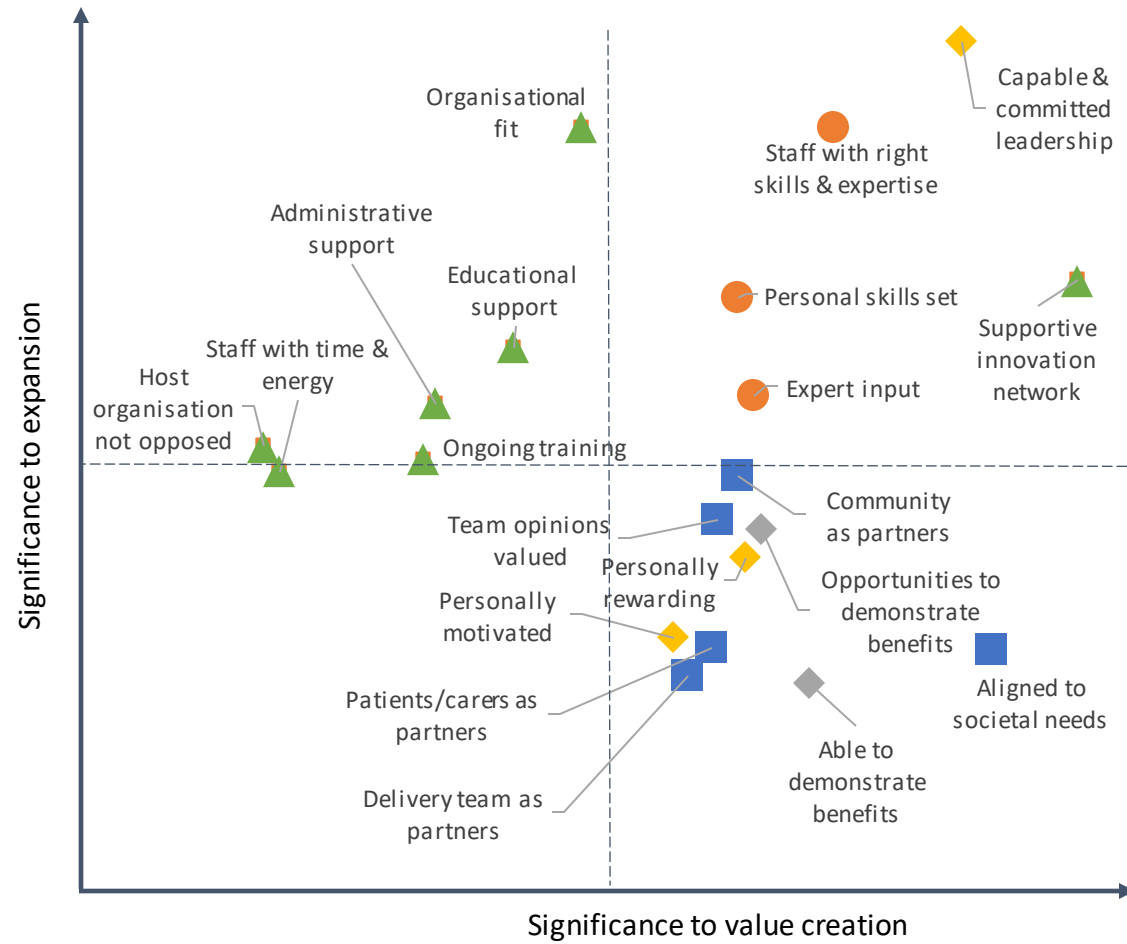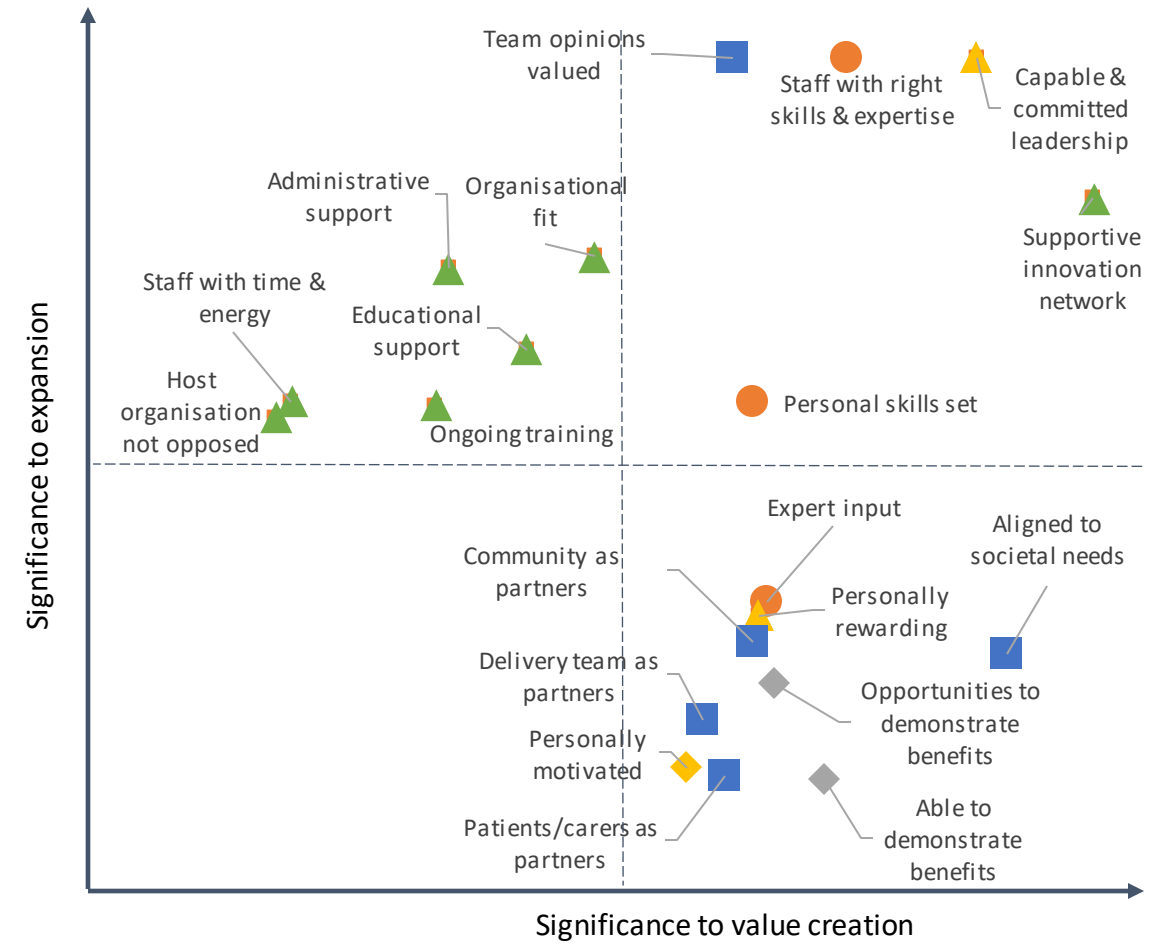

## Critical success factors plotted according to their significance to success

- Natural logarithmic axes: factors above and to the right of the dotted line have significance  $\geq 0.05$
- Expansion axis: significance to whether a project becomes embedded or spread
- Value creation axis: significance to clinical value "did it work for the intended beneficiaries"

## Key

- = skills & expertise
- = participation
- ◆ = evaluation
- ▲ = resourcing & support
- ◆ = leadership skills & motivation



# Nested Hierarchy of Needs for Success in Health Service Innovation

1  
2  
3  
4  
5  
6  
7  
8  
9  
10  
11  
12  
13  
14  
15  
16  
17  
18  
19  
20  
21  
22  
23  
24  
25  
26  
27  
28  
29  
30  
31  
32  
33  
34  
35  
36  
37  
38  
39  
40  
41

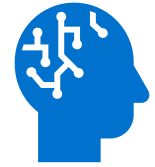

**Core success factors** are important to whether an innovation creates value, *and* to whether it embeds or spreads:

- Leadership skills, expertise and capability
- Sufficient staff with the right skills and expertise
- Expert input and a supportive collaborative network of innovators

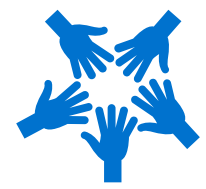

**Value creation factors** are specific to whether an innovation creates value for its intended beneficiaries:

- Involvement of patients, public, practitioners and communities; alignment to societal needs
- Motivated leadership, opportunities to showcase success

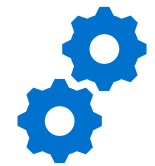

**Expansion factors** are specific to whether a valuable innovation embeds or spreads:

- Organisational fit and support
- Access to administrative and educational support
- Staff with time and capacity

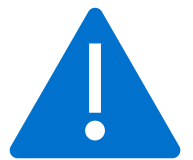

**Additional limiting factors** were described at the boundaries and intersections between organisations, professions, sectors and cultures; lack of structural support beyond the start-up phase; staff burnout and turnover

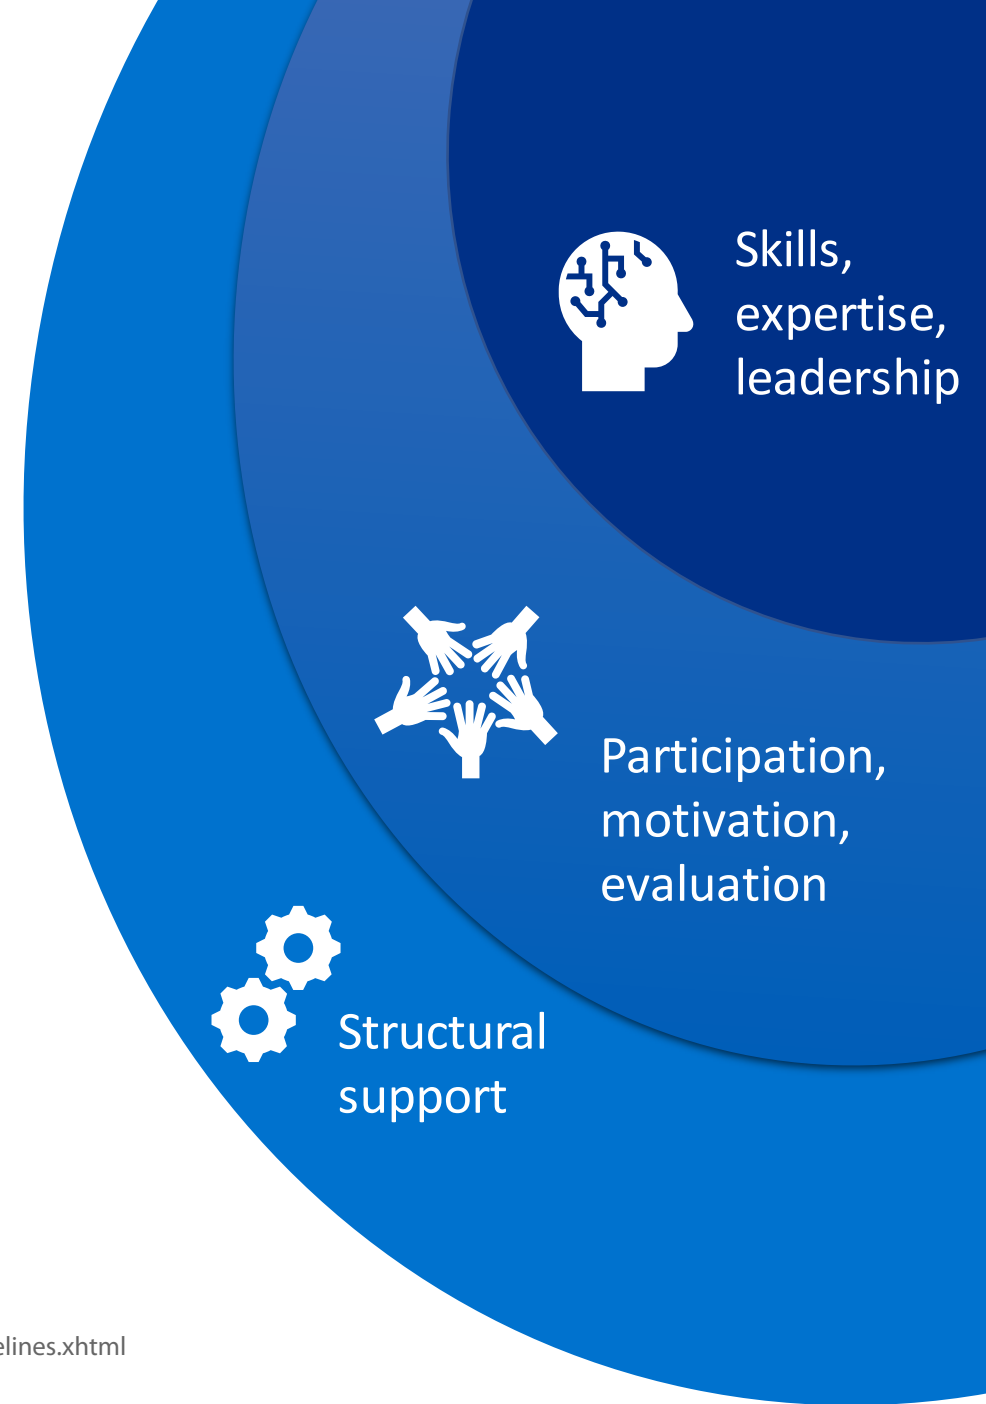



# Sustaining and embedding healthcare innovations - HIN evaluation - post scoping

---

## Start of Block: Opening block

Q1

### **Sustaining and embedding healthcare innovations: an evaluation for the Health Innovation Network and Health Education England**

This questionnaire is being conducted by King's College London on behalf of Health Education England and the Health Innovation Network (HIN). The questionnaire aims to explore factors influencing the long term success of healthcare innovations. You will be asked to rate a set of factors that have been identified from the current literature and evidence.

Each rating should represent your overall impression of whether the factor has influenced the project named below. Please use the free text boxes to help us understand any factors that you feel are particularly important.

#### **How will my responses be used?**

HIN would like to support healthcare innovators so that their projects are more likely to become sustained and embedded. Aggregated responses will be used by HIN to target training and development, and to disseminate learning about factors that impact on the sustainability of healthcare innovations. You will not be identified as a respondent.

#### **Why have I been approached?**

You are the named recipient of [\\${e://Field/Award}](#) from the Health Innovation Network of South London. This project has been approved by King's College Research Ethics Committee Ref: LRS-18/19-10432.

#### **Which project does this survey relate to?**

[\\${e://Field/ProjectTitle}](#)

---

1  
2  
3 Q3 Please tell us about the above named project (select one)  
4  
5

- 6  It is no longer running (you can tell us why later) (1)  
7  
8  It is running, but likely to finish soon (2)  
9  
10  It is running in a stable way but has NOT been adopted beyond its original pilot (3)  
11  
12  It is running in a stable way and HAS been adopted beyond its original pilot (4)  
13  
14  It is too early to have a view on its long term status (5)  
15  
16  Other (7) \_\_\_\_\_  
17  
18  
19  
20
- 

21  
22  
23 Q4 Tell us about yourself (tick ALL that apply)  
24  
25

- 26  I am part of the project leadership team (1)  
27  
28  I am part of the project administrative team (2)  
29  
30  I am part of the project training team (3)  
31  
32  I am a healthcare/socialcare professional delivering this project to  
33 patients/service users (4)  
34  
35  I am a patient/service user (5)  
36  
37  Other (please describe) (6)  
38  
39  
40  
41  
42  
43  
44  
45
- 

46 **End of Block: Opening block**

---

47  
48 **Start of Block: The Project**

49  
50  
51 **Q18 Factors relating to the type of project, and what it was trying to achieve.**

52  
53 Please use the free text box at the bottom to help us understand any factors that you feel are  
54 particularly important.  
55  
56  
57  
58  
59  
60

1  
2  
3  
4  
5  
6  
7  
8  
9  
10  
11  
12  
13  
14  
15  
16  
17  
18  
19  
20  
21  
22  
23  
24  
25  
26  
27  
28  
29  
30  
31  
32  
33  
34  
35  
36  
37  
38  
39  
40  
41  
42  
43  
44  
45  
46  
47  
48  
49  
50  
51  
52  
53  
54  
55  
56  
57  
58  
59  
60

---

Q66 The initiative was designed to end once a set outcome had been achieved.

- Agree (1)
- Somewhat agree (2)
- Neither agree nor disagree (3)
- Somewhat disagree (4)
- Disagree (5)
- Don't know (6)
- 

Q67 The initiative was designed to end after defined period of time.

- Agree (1)
- Somewhat agree (2)
- Neither agree nor disagree (3)
- Somewhat disagree (4)
- Disagree (5)
- Don't know (6)
-

1  
2  
3 Q68 The initiative was designed to address an important healthcare need.  
4  
5

- 6  Agree (1)  
7  
8  Somewhat agree (2)  
9  
10  
11  Neither agree nor disagree (3)  
12  
13  
14  Somewhat disagree (4)  
15  
16  
17  Disagree (5)  
18  
19  
20  Don't know (6)  
21  
22
- 

23  
24  
25  
26 Q69 There was public/political recognition and concern for the problem that the initiative was  
27 designed to address.  
28

- 29  Agree (1)  
30  
31  
32  Somewhat agree (2)  
33  
34  
35  Neither agree nor disagree (3)  
36  
37  
38  Somewhat disagree (4)  
39  
40  
41  Disagree (5)  
42  
43  
44  Don't know (6)  
45  
46  
47
-

1  
2  
3 Q72 The initiative was based on a strong evidence base, and it was credible that the stated  
4 benefits could be achieved through the project plan.  
5

- 6  
7  Agree (1)  
8  
9  
10  Somewhat agree (2)  
11  
12  
13  Neither agree nor disagree (3)  
14  
15  
16  Somewhat disagree (4)  
17  
18  
19  Disagree (5)  
20  
21  
22  Don't know (6)  
23
- 

24  
25  
26  
27 Q79 Insights or details relating to the type of project or what it was trying to achieve, and how  
28 this has impacted on whether the initiative has become sustained and embedded:  
29

30  
31 \_\_\_\_\_  
32  
33 \_\_\_\_\_  
34  
35 \_\_\_\_\_  
36  
37 \_\_\_\_\_  
38  
39 \_\_\_\_\_  
40

41 **End of Block: The Project**

42  
43 **Start of Block: Resources**

44  
45  
46 **Q26 Factors relating to how well the project was resourced.**

47 Please use the free text box at the bottom to help us understand any factors that you feel are  
48 particularly important.  
49  
50  
51

---

1  
2  
3 Q65 The project was sufficiently funded.  
4

- 5  Agree (1)  
6  
7  
8  Somewhat agree (2)  
9  
10  
11  Neither agree nor disagree (3)  
12  
13  
14  Somewhat disagree (4)  
15  
16  
17  Disagree (5)  
18  
19  
20  Don't know (6)  
21  
22
- 

23  
24  
25  
26 Q36 The project had sufficient infrastructure, such as buildings, office space, materials or  
27 supplies.  
28

- 29  Agree (1)  
30  
31  
32  Somewhat agree (2)  
33  
34  
35  Neither agree nor disagree (3)  
36  
37  
38  Somewhat disagree (4)  
39  
40  
41  Disagree (5)  
42  
43  
44  Don't know (6)  
45  
46  
47
-

1  
2  
3 Q37 There were sufficient members of staff with the right skills to meet the requirements of the  
4 initiative.  
5

- 6  Agree (1)  
7  
8  Somewhat agree (2)  
9  
10  
11  Neither agree nor disagree (3)  
12  
13  
14  Somewhat disagree (4)  
15  
16  
17  Disagree (5)  
18  
19  
20  Don't know (6)  
21  
22  
23
- 

24  
25  
26  
27 Q38 Members of staff had sufficient energy and time to dedicate to the initiative.  
28

- 29  Agree (1)  
30  
31  Somewhat agree (2)  
32  
33  
34  Neither agree nor disagree (3)  
35  
36  
37  Somewhat disagree (4)  
38  
39  
40  Disagree (5)  
41  
42  
43  Don't know (6)  
44  
45  
46  
47
-

1  
2  
3 Q35 There was sufficient administrative support to deliver and maintain the initiative.  
4  
5

- 6  Agree (1)  
7  
8  Somewhat agree (2)  
9  
10  
11  Neither agree nor disagree (3)  
12  
13  
14  Somewhat disagree (4)  
15  
16  
17  Disagree (5)  
18  
19  
20  Don't know (6)  
21  
22
- 

23  
24  
25  
26 Q39 There was sufficient technical support to deliver and maintain the initiative.  
27

- 28  Agree (1)  
29  
30  
31  Somewhat agree (2)  
32  
33  
34  Neither agree nor disagree (3)  
35  
36  
37  Somewhat disagree (4)  
38  
39  
40  Disagree (5)  
41  
42  
43  Don't know (6)  
44  
45
-



1  
2  
3 Q40 There was sufficient educational support to deliver and maintain the initiative.  
4

- 5  Agree (1)  
6  
7  
8  Somewhat agree (2)  
9  
10  
11  Neither agree nor disagree (3)  
12  
13  
14  Somewhat disagree (4)  
15  
16  
17  Disagree (5)  
18  
19  
20  Don't know (6)  
21  
22

23  
24  
25  
26 Q87 Insights or details relating to how well the project was resourced, and how this has  
27 impacted on whether the initiative has become sustained and embedded:  
28

29  
30  
31  
32  
33  
34  
35  
36  
37  
38

39  
40 **End of Block: Resources**  
41

42 **Start of Block: External environment**  
43  
44

45 **Q47 Factors relating to how the project intersected with the external environment.**

46 Please use the free text box at the bottom to help us understand any factors that you feel are  
47 particularly important.  
48  
49

1  
2  
3 Q41 External political or societal factors impacted negatively on the delivery of the initiative.  
4  
5

- 6  Agree (1)  
7  
8  Somewhat agree (2)  
9  
10  
11  Neither agree nor disagree (3)  
12  
13  
14  Somewhat disagree (4)  
15  
16  
17  Disagree (5)  
18  
19  
20  Don't know (6)  
21  
22
- 

23  
24  
25  
26 Q42 It was necessary to adapt the project so that it aligned more closely with external political  
27 or societal priorities.  
28

- 29  
30  Agree (1)  
31  
32  Somewhat agree (2)  
33  
34  
35  Neither agree nor disagree (3)  
36  
37  
38  Somewhat disagree (4)  
39  
40  
41  Disagree (5)  
42  
43  
44  Don't know (6)  
45  
46  
47
-

1  
2  
3 Q43 We had opportunities to demonstrate the benefits of this innovation within our organisation  
4 and/or to other organisations.  
5

- 6  Agree (1)  
7  
8  Somewhat agree (2)  
9  
10  
11  
12  Neither agree nor disagree (3)  
13  
14  
15  Somewhat disagree (4)  
16  
17  
18  Disagree (5)  
19  
20  
21  Don't know (6)  
22  
23
- 

24  
25  
26  
27 Q44 Steps were taken to raise the profile of the initiative e.g. through media, marketing,  
28 community engagement or publications.  
29

- 30  
31  Agree (1)  
32  
33  Somewhat agree (2)  
34  
35  
36  
37  Neither agree nor disagree (3)  
38  
39  
40  Somewhat disagree (4)  
41  
42  
43  Disagree (5)  
44  
45  
46  Don't know (6)  
47  
48
-

1  
2  
3 Q45 There are plans to replicate this innovation at other sites or spread it to other parts of the  
4 organisation.  
5

- 6  Agree (1)  
7  
8  Somewhat agree (2)  
9  
10  Neither agree nor disagree (3)  
11  
12  Somewhat disagree (4)  
13  
14  Disagree (5)  
15  
16  Don't know (6)  
17  
18  
19  
20  
21  
22  
23
- 

24  
25  
26  
27 Q92 Insights or details relating to how the project intersected with the external environment, and  
28 how this has impacted on whether the initiative has become sustained and embedded:  
29

30  
31 \_\_\_\_\_  
32  
33 \_\_\_\_\_  
34  
35 \_\_\_\_\_  
36  
37 \_\_\_\_\_  
38  
39 \_\_\_\_\_  
40

41 **End of Block: External environment**

---

42  
43 **Start of Block: The organisation**

44  
45  
46 **Q49 Factors relating to the host organisation within which this initiative was situated.**

47 Your comments will not be fed directly back to the host organisation, however they may be used  
48 to identify a training need. Please use the free text box at the bottom to help us understand any  
49 factors that you feel are particularly important.  
50  
51

52  
53  
54 We believe the host organisation for this innovation to be:

55 **`#{e://Field/Organisation}`**  
56  
57  
58

1  
2  
3  
4 If you are referring to another organisation (e.g. CCG, Hospital Trust) please name it here:  
5  
6  
7 \_\_\_\_\_  
8  
9 \_\_\_\_\_

10  
11 Q48 The initiative integrated well into existing organisational structures, programmes or policies.  
12

- 13  
14  Agree (1)  
15  
16  Somewhat agree (2)  
17  
18  Neither agree nor disagree (3)  
19  
20  Somewhat disagree (4)  
21  
22  Disagree (5)  
23  
24  Don't know (6)  
25  
26  
27  
28  
29  
30  
31

32  
33  
34 Q50 It was necessary to adapt the initiative so that it achieved a good fit with existing  
35 organisational structures, programmes or policies.  
36

- 37  
38  Agree (1)  
39  
40  Somewhat agree (2)  
41  
42  Neither agree nor disagree (3)  
43  
44  Somewhat disagree (4)  
45  
46  Disagree (5)  
47  
48  Don't know (6)  
49  
50  
51  
52  
53  
54  
55  
56  
57  
58  
59  
60

1  
2  
3  
4 Q51 The host organisation was ready and able to undertake the initiative.  
5  
6

- 7  Agree (1)  
8  
9  Somewhat agree (2)  
10  
11  Neither agree nor disagree (3)  
12  
13  Somewhat disagree (4)  
14  
15  Disagree (5)  
16  
17  Don't know (6)  
18  
19  
20  
21  
22  
23
- 

24  
25  
26  
27 Q52 The initiative was hampered by opposition from within the host organisation.  
28  
29

- 30  Agree (1)  
31  
32  Somewhat agree (2)  
33  
34  Neither agree nor disagree (3)  
35  
36  Somewhat disagree (4)  
37  
38  Disagree (5)  
39  
40  Don't know (6)  
41  
42  
43  
44  
45  
46  
47
-

1  
2  
3 Q53 The host organisation lacked the necessary values/culture to support and sustain the  
4 initiative.  
5

- 6  Agree (1)  
7  
8  Somewhat agree (2)  
9  
10  
11  Neither agree nor disagree (3)  
12  
13  
14  Somewhat disagree (4)  
15  
16  
17  Disagree (5)  
18  
19  
20  Don't know (6)  
21  
22  
23
- 

24  
25  
26  
27 Q97 Insights or details relating to the host organisation within which this initiative was situated,  
28 and how this has impacted on whether the initiative has become sustained and embedded:  
29

30  
31 \_\_\_\_\_  
32  
33 \_\_\_\_\_  
34  
35 \_\_\_\_\_  
36  
37 \_\_\_\_\_  
38  
39 \_\_\_\_\_  
40

41 **End of Block: The organisation**

42  
43 **Start of Block: Personal factors**

44  
45  
46 **Q148 Factors relating to yourself.**

47 Please use the free text box at the bottom to help us understand any factors that you feel are  
48 particularly important. We respect your privacy: individual responses will not be linked to you or  
49 your project. Please skip any questions you do not feel comfortable answering.  
50  
51

---

1  
2  
3 Q150 I was released from other duties so that I could implement this initiative.  
4  
5

- 6  Agree (1)  
7  
8  Somewhat agree (2)  
9  
10  
11  Neither agree nor disagree (3)  
12  
13  
14  Somewhat disagree (4)  
15  
16  
17  Disagree (5)  
18  
19  
20  Don't know (6)  
21  
22
- 

23  
24  
25  
26 Q151 I had a supportive peer network that I could discuss any issues or problems with.  
27

- 28  Agree (1)  
29  
30  
31  Somewhat agree (2)  
32  
33  
34  Neither agree nor disagree (3)  
35  
36  
37  Somewhat disagree (4)  
38  
39  
40  Disagree (5)  
41  
42  
43  Don't know (6)  
44  
45
-



1  
2  
3 Q152 I was internally motivated to implement this initiative.  
4

- 5  Agree (1)  
6  
7  
8  Somewhat agree (2)  
9  
10  
11  Neither agree nor disagree (3)  
12  
13  
14  Somewhat disagree (4)  
15  
16  
17  Disagree (5)  
18  
19  
20  Don't know (6)  
21  
22
- 

23  
24  
25  
26 Q78 I found working on the initiative personally rewarding.  
27

- 28  Agree (1)  
29  
30  
31  Somewhat agree (2)  
32  
33  
34  Neither agree nor disagree (3)  
35  
36  
37  Somewhat disagree (4)  
38  
39  
40  Disagree (5)  
41  
42  
43  Don't know (6)  
44  
45
-

1  
2  
3 Q153 I feel I had the right skills/experience/training to implement and sustain the initiative.  
4  
5

- 6  Agree (1)  
7  
8  Somewhat agree (2)  
9  
10  
11  Neither agree nor disagree (3)  
12  
13  
14  Somewhat disagree (4)  
15  
16  
17  Disagree (5)  
18  
19  
20  Don't know (6)  
21  
22

23  
24  
25  
26 Q149 I had sufficient energy and time to dedicate to the initiative.  
27

- 28  Agree (1)  
29  
30  
31  Somewhat agree (2)  
32  
33  
34  Neither agree nor disagree (3)  
35  
36  
37  Somewhat disagree (4)  
38  
39  
40  Disagree (5)  
41  
42  
43  Don't know (6)  
44  
45

46  
47  
48 Q154 Insights or details relating to yourself, and how this has impacted on whether the  
49 initiative has become sustained and embedded:  
50  
51

52 \_\_\_\_\_  
53  
54 \_\_\_\_\_  
55

1  
2  
3  
4  
5  
6  
7  
8  
9  
10 **End of Block: Personal factors**

---

11  
12 **Start of Block: Implementation**

13  
14  
15 **Q55 Factors relating to how the project was implemented.**

16 Please use the free text box at the bottom to help us understand any factors that you feel are  
17 particularly important.  
18  
19

---

20  
21  
22  
23 **Q54 The project had sufficient input from experts with the necessary knowledge and**  
24 **experience.**

- 25  
26  Agree (1)  
27  
28  
29  Somewhat agree (2)  
30  
31  
32  Neither agree nor disagree (3)  
33  
34  
35  Somewhat disagree (4)  
36  
37  
38  Disagree (5)  
39  
40  
41  Don't know (6)  
42  
43  
44  
45  
46  
47  
48  
49  
50  
51  
52  
53  
54  
55  
56  
57  
58  
59  
60

1  
2  
3 Q56 The outcomes and impact of the project were measured or assessed.  
4  
5

- 6  Agree (1)  
7  
8  Somewhat agree (2)  
9  
10  
11  Neither agree nor disagree (3)  
12  
13  
14  Somewhat disagree (4)  
15  
16  
17  Disagree (5)  
18  
19  
20  Don't know (6)  
21  
22
- 

23  
24  
25  
26 Q57 We were able to demonstrate the effectiveness of the project.  
27

- 28  Agree (1)  
29  
30  
31  Somewhat agree (2)  
32  
33  
34  Neither agree nor disagree (3)  
35  
36  
37  Somewhat disagree (4)  
38  
39  
40  Disagree (5)  
41  
42  
43  Don't know (6)  
44  
45
-

1  
2  
3 Q58 Performance data was gathered and reported on a regular basis.  
4

- 5  Agree (1)  
6  
7  
8  Somewhat agree (2)  
9  
10  
11  Neither agree nor disagree (3)  
12  
13  
14  Somewhat disagree (4)  
15  
16  
17  Disagree (5)  
18  
19  
20  Don't know (6)  
21  
22
- 

23  
24  
25  
26 Q59 Steps were taken to systematically improve and adapt the project.  
27

- 28  Agree (1)  
29  
30  
31  Somewhat agree (2)  
32  
33  
34  Neither agree nor disagree (3)  
35  
36  
37  Somewhat disagree (4)  
38  
39  
40  Disagree (5)  
41  
42  
43  Don't know (6)  
44  
45
-

1  
2  
3 Q60 There was ongoing orientation and training available e.g. to new staff or to build capacity.  
4  
5

- 6  Agree (1)  
7  
8  Somewhat agree (2)  
9  
10  
11  Neither agree nor disagree (3)  
12  
13  
14  Somewhat disagree (4)  
15  
16  
17  Disagree (5)  
18  
19  
20  Don't know (6)  
21  
22
- 

23  
24  
25  
26 Q61 Staff were given time/incentives to attend the necessary training.  
27

- 28  Agree (1)  
29  
30  
31  Somewhat agree (2)  
32  
33  
34  Neither agree nor disagree (3)  
35  
36  
37  Somewhat disagree (4)  
38  
39  
40  Disagree (5)  
41  
42  
43  Don't know (6)  
44  
45
-

1  
2  
3 Q62 Staff were required to attend the necessary training.  
4

- 5  Agree (1)  
6  
7  
8  Somewhat agree (2)  
9  
10  
11  Neither agree nor disagree (3)  
12  
13  
14  Somewhat disagree (4)  
15  
16  
17  Disagree (5)  
18  
19  
20  Don't know (6)  
21  
22

23  
24  
25  
26 Q105 Insights or details relating to how the project was implemented, and how this has  
27 impacted on whether the initiative has become sustained and embedded:  
28

29  
30  
31  
32  
33  
34  
35  
36  
37  
38

39  
40 **End of Block: Implementation**  
41

42 **Start of Block: The work/tasks**  
43  
44

45 **Q64 Factors relating to the tasks of the project.**

46 Please use the free text box at the bottom to help us understand any factors that you feel are  
47 particularly important.  
48  
49

1  
2  
3 Q63 The initiative was difficult or complex to deliver.  
4

- 5  Agree (1)  
6  
7  
8  Somewhat agree (2)  
9  
10  
11  Neither agree nor disagree (3)  
12  
13  
14  Somewhat disagree (4)  
15  
16  
17  Disagree (5)  
18  
19  
20  Don't know (6)  
21  
22
- 

23  
24  
25  
26 Q65 The initiative helped to make things easier or more efficient.  
27

- 28  Agree (1)  
29  
30  
31  Somewhat agree (2)  
32  
33  
34  Neither agree nor disagree (3)  
35  
36  
37  Somewhat disagree (4)  
38  
39  
40  Disagree (5)  
41  
42  
43  Don't know (6)  
44  
45
-



1  
2  
3 Q66 The initiative did not require special or extra effort.  
4

- 5  Agree (1)  
6  
7  
8  Somewhat agree (2)  
9  
10  
11  Neither agree nor disagree (3)  
12  
13  
14  Somewhat disagree (4)  
15  
16  
17  Disagree (5)  
18  
19  
20  Don't know (6)  
21  
22

23  
24  
25  
26 Q67 I believe that the staff delivering the initiative found the work/tasks rewarding and  
27 satisfying.  
28

- 29  Agree (1)  
30  
31  
32  Somewhat agree (2)  
33  
34  
35  Neither agree nor disagree (3)  
36  
37  
38  Somewhat disagree (4)  
39  
40  
41  Disagree (5)  
42  
43  
44  Don't know (6)  
45  
46

47  
48  
49  
50 Q109 Insights or details relating to the tasks of the project, and how this has impacted on  
51 whether the initiative has become sustained and embedded:  
52

53  
54 \_\_\_\_\_  
55  
56 \_\_\_\_\_  
57

1  
2  
3  
4  
5  
6  
7  
8  
9  
10 **End of Block: The work/tasks**

---

11  
12 **Start of Block: Team processes**

13  
14  
15 **Q68 Factors relating to team processes.**

16 Your answers will not be fed back directly to the team, however they may be used to identify  
17 training needs across the network. Please use the free text box at the bottom to help us  
18 understand any factors that you feel are particularly important.  
19  
20  
21  
22  
23

---

24 **Q69 The project team worked well together.**

- 25  
26  Agree (1)  
27  
28  
29  Somewhat agree (2)  
30  
31  
32  Neither agree nor disagree (3)  
33  
34  
35  Somewhat disagree (4)  
36  
37  
38  Disagree (5)  
39  
40  
41  Don't know (6)  
42  
43  
44  
45  
46  
47  
48  
49  
50  
51  
52  
53  
54  
55  
56  
57  
58  
59  
60

1  
2  
3 Q70 There were clear responsibilities for individuals: the work was shared across the team.  
4  
5

- 6  Agree (1)  
7  
8  Somewhat agree (2)  
9  
10  Neither agree nor disagree (3)  
11  
12  Somewhat disagree (4)  
13  
14  Disagree (5)  
15  
16  Don't know (6)  
17  
18  
19  
20  
21  
22
- 

23  
24  
25  
26 Q71 Project was overly dependent on a particular individual or individuals.  
27

- 28  Agree (1)  
29  
30  Somewhat agree (2)  
31  
32  Neither agree nor disagree (3)  
33  
34  Somewhat disagree (4)  
35  
36  Disagree (5)  
37  
38  Don't know (6)  
39  
40  
41  
42  
43  
44  
45
-

1  
2  
3 Q72 I believe that the team understood what the project was trying to achieve and that it would  
4 lead to improved processes and outcomes.  
5

- 6  
7  Agree (1)  
8  
9  
10  Somewhat agree (2)  
11  
12  
13  Neither agree nor disagree (3)  
14  
15  
16  Somewhat disagree (4)  
17  
18  
19  Disagree (5)  
20  
21  
22  Don't know (6)  
23
- 

24  
25  
26  
27 Q73 There were rewards or incentives that supported engagement with, and continued delivery  
28 of, the initiative.  
29

- 30  
31  Agree (1)  
32  
33  
34  Somewhat agree (2)  
35  
36  
37  Neither agree nor disagree (3)  
38  
39  
40  Somewhat disagree (4)  
41  
42  
43  Disagree (5)  
44  
45  
46  Don't know (6)  
47
-

1  
2  
3 Q74 The activities and roles of the initiative were incorporated into job descriptions.  
4

- 5  Agree (1)  
6  
7  
8  Somewhat agree (2)  
9  
10  
11  Neither agree nor disagree (3)  
12  
13  
14  Somewhat disagree (4)  
15  
16  
17  Disagree (5)  
18  
19  
20  Don't know (6)  
21  
22
- 

23  
24  
25  
26 Q75 Staff had time within their working hours to complete the tasks of the initiative.  
27

- 28  Agree (1)  
29  
30  
31  Somewhat agree (2)  
32  
33  
34  Neither agree nor disagree (3)  
35  
36  
37  Somewhat disagree (4)  
38  
39  
40  Disagree (5)  
41  
42  
43  Don't know (6)  
44  
45
-

1  
2  
3 Q76 The initiative had leadership and/or champions who were committed and capable.  
4

- 5  Agree (1)  
6  
7  
8  Somewhat agree (2)  
9  
10  
11  Neither agree nor disagree (3)  
12  
13  
14  Somewhat disagree (4)  
15  
16  
17  Disagree (5)  
18  
19  
20  Don't know (6)  
21  
22
- 

23  
24  
25  
26 Q77 There was an appropriate balance of power between those involved with the initiative.  
27

- 28  Agree (1)  
29  
30  
31  Somewhat agree (2)  
32  
33  
34  Neither agree nor disagree (3)  
35  
36  
37  Somewhat disagree (4)  
38  
39  
40  Disagree (5)  
41  
42  
43  Don't know (6)  
44  
45
-

1  
2  
3 Q78 Team members were able to express their opinions, and their opinions were valued.  
4

- 5  Agree (1)  
6  
7  
8  Somewhat agree (2)  
9  
10  
11  Neither agree nor disagree (3)  
12  
13  
14  Somewhat disagree (4)  
15  
16  
17  Disagree (5)  
18  
19  
20  Don't know (6)  
21  
22

23  
24  
25  
26 Q119 Insights or details relating to team dynamics and processes, and how these impacted on  
27 whether the initiative has become sustained and embedded:  
28

29  
30  
31  
32  
33  
34  
35  
36  
37  
38

39  
40 **End of Block: Team processes**  
41

42 **Start of Block: Participation**  
43  
44

45 **Q79 Factors relating to ownership and involvement in the project.**

46 Please use the free text box at the bottom to help us understand any factors that you feel are  
47 particularly important.  
48  
49

1  
2  
3 Q80 There was a sense of ownership and commitment by those involved with the initiative.  
4  
5

- 6  Agree (1)  
7  
8  Somewhat agree (2)  
9  
10  
11  Neither agree nor disagree (3)  
12  
13  
14  Somewhat disagree (4)  
15  
16  
17  Disagree (5)  
18  
19  
20  Don't know (6)  
21  
22

23  
24  
25  
26 Q81 Staff who were responsible for delivering the initiative were involved as partners, and were  
27 able to shape the initiative.  
28

- 29  
30  Agree (1)  
31  
32  Somewhat agree (2)  
33  
34  
35  Neither agree nor disagree (3)  
36  
37  
38  Somewhat disagree (4)  
39  
40  
41  Disagree (5)  
42  
43  
44  Don't know (6)  
45  
46  
47



1  
2  
3 Q82 The beneficiaries (patients/service users) were involved as partners, and were able to  
4 shape the initiative.  
5

- 6  Agree (1)  
7  
8  Somewhat agree (2)  
9  
10  
11  Neither agree nor disagree (3)  
12  
13  
14  Somewhat disagree (4)  
15  
16  
17  Disagree (5)  
18  
19  
20  Don't know (6)  
21  
22  
23
- 

24  
25  
26  
27 Q83 The community in which it was situated were involved as partners, and were able to shape  
28 the initiative.  
29

- 30  Agree (1)  
31  
32  
33  Somewhat agree (2)  
34  
35  
36  Neither agree nor disagree (3)  
37  
38  
39  Somewhat disagree (4)  
40  
41  
42  Disagree (5)  
43  
44  
45  Don't know (6)  
46  
47  
48
-

1  
2  
3 Q84 There was a collaborative network of people/organisations that helped to support and  
4 sustain the initiative.  
5

- 6  Agree (1)  
7  
8  Somewhat agree (2)  
9  
10  
11  
12  Neither agree nor disagree (3)  
13  
14  
15  Somewhat disagree (4)  
16  
17  
18  Disagree (5)  
19  
20  
21  Don't know (6)  
22  
23
- 

24  
25  
26  
27 Q85 It felt as though the initiative was imposed on us and there was little sense of ownership or  
28 commitment to the project.  
29

- 30  
31  Agree (1)  
32  
33  Somewhat agree (2)  
34  
35  
36  Neither agree nor disagree (3)  
37  
38  
39  Somewhat disagree (4)  
40  
41  
42  Disagree (5)  
43  
44  
45  Don't know (6)  
46  
47
- 

48  
49  
50  
51 Q125 Insights or details relating to ownership or involvement in the project, and how these  
52 impacted on whether the initiative has become sustained and embedded:  
53  
54  
55 \_\_\_\_\_  
56  
57  
58  
59

1  
2  
3  
4  
5  
6  
7  
8  
9  
10  
11  
12  
13  
14  
15  
16  
17  
18  
19  
20  
21  
22  
23  
24  
25  
26  
27  
28  
29  
30  
31  
32  
33  
34  
35  
36  
37  
38  
39  
40  
41  
42  
43  
44  
45  
46  
47  
48  
49  
50  
51  
52  
53  
54  
55  
56  
57  
58  
59  
60

---

---

---

---

**End of Block: Participation**

---

**Start of Block: End of survey**

Thank you for taking part in this survey. If you have any questions please contact the lead researcher [kathleen.leadham-green@kcl.ac.uk](mailto:kathleen.leadham-green@kcl.ac.uk).

**End of Block: End of survey**

---

For peer review only

## Standards for Reporting Qualitative Research (SRQR)\*

<http://www.equator-network.org/reporting-guidelines/srqr/>

Page/line no(s).

### Title and abstract

|                                                                                                                                                                                                                                                       |   |
|-------------------------------------------------------------------------------------------------------------------------------------------------------------------------------------------------------------------------------------------------------|---|
| <b>Title</b> - Concise description of the nature and topic of the study Identifying the study as qualitative or indicating the approach (e.g., ethnography, grounded theory) or data collection methods (e.g., interview, focus group) is recommended | 4 |
| <b>Abstract</b> - Summary of key elements of the study using the abstract format of the intended publication; typically includes background, purpose, methods, results, and conclusions                                                               | 2 |

### Introduction

|                                                                                                                                                              |   |
|--------------------------------------------------------------------------------------------------------------------------------------------------------------|---|
| <b>Problem formulation</b> - Description and significance of the problem/phenomenon studied; review of relevant theory and empirical work; problem statement | 4 |
| <b>Purpose or research question</b> - Purpose of the study and specific objectives or questions                                                              | 5 |

### Methods

|                                                                                                                                                                                                                                                                                                                                                                                                      |   |
|------------------------------------------------------------------------------------------------------------------------------------------------------------------------------------------------------------------------------------------------------------------------------------------------------------------------------------------------------------------------------------------------------|---|
| <b>Qualitative approach and research paradigm</b> - Qualitative approach (e.g., ethnography, grounded theory, case study, phenomenology, narrative research) and guiding theory if appropriate; identifying the research paradigm (e.g., postpositivist, constructivist/ interpretivist) is also recommended; rationale**                                                                            | 5 |
| <b>Researcher characteristics and reflexivity</b> - Researchers' characteristics that may influence the research, including personal attributes, qualifications/experience, relationship with participants, assumptions, and/or presuppositions; potential or actual interaction between researchers' characteristics and the research questions, approach, methods, results, and/or transferability | 5 |
| <b>Context</b> - Setting/site and salient contextual factors; rationale**                                                                                                                                                                                                                                                                                                                            | 5 |
| <b>Sampling strategy</b> - How and why research participants, documents, or events were selected; criteria for deciding when no further sampling was necessary (e.g., sampling saturation); rationale**                                                                                                                                                                                              | 5 |
| <b>Ethical issues pertaining to human subjects</b> - Documentation of approval by an appropriate ethics review board and participant consent, or explanation for lack thereof; other confidentiality and data security issues                                                                                                                                                                        | 5 |
| <b>Data collection methods</b> - Types of data collected; details of data collection procedures including (as appropriate) start and stop dates of data collection and                                                                                                                                                                                                                               | 6 |

|                                                                                                                                                                                                                                                       |      |
|-------------------------------------------------------------------------------------------------------------------------------------------------------------------------------------------------------------------------------------------------------|------|
| analysis, iterative process, triangulation of sources/methods, and modification of procedures in response to evolving study findings; rationale**                                                                                                     |      |
| <b>Data collection instruments and technologies</b> - Description of instruments (e.g., interview guides, questionnaires) and devices (e.g., audio recorders) used for data collection; if/how the instrument(s) changed over the course of the study | 6, 7 |
| <b>Units of study</b> - Number and relevant characteristics of participants, documents, or events included in the study; level of participation (could be reported in results)                                                                        | 8    |
| <b>Data processing</b> - Methods for processing data prior to and during analysis, including transcription, data entry, data management and security, verification of data integrity, data coding, and anonymization/de-identification of excerpts    | 7    |
| <b>Data analysis</b> - Process by which inferences, themes, etc., were identified and developed, including the researchers involved in data analysis; usually references a specific paradigm or approach; rationale**                                 | 7    |
| <b>Techniques to enhance trustworthiness</b> - Techniques to enhance trustworthiness and credibility of data analysis (e.g., member checking, audit trail, triangulation); rationale**                                                                | 7,8  |

### Results/findings

|                                                                                                                                                                                                   |                   |
|---------------------------------------------------------------------------------------------------------------------------------------------------------------------------------------------------|-------------------|
| <b>Synthesis and interpretation</b> - Main findings (e.g., interpretations, inferences, and themes); might include development of a theory or model, or integration with prior research or theory | 8-14              |
| <b>Links to empirical data</b> - Evidence (e.g., quotes, field notes, text excerpts, photographs) to substantiate analytic findings                                                               | Table 2 and 11-14 |

### Discussion

|                                                                                                                                                                                                                                                                                                                                                                                                             |       |
|-------------------------------------------------------------------------------------------------------------------------------------------------------------------------------------------------------------------------------------------------------------------------------------------------------------------------------------------------------------------------------------------------------------|-------|
| <b>Integration with prior work, implications, transferability, and contribution(s) to the field</b> - Short summary of main findings; explanation of how findings and conclusions connect to, support, elaborate on, or challenge conclusions of earlier scholarship; discussion of scope of application/generalizability; identification of unique contribution(s) to scholarship in a discipline or field | 15-16 |
| <b>Limitations</b> - Trustworthiness and limitations of findings                                                                                                                                                                                                                                                                                                                                            | 15    |

### Other

|                                                                                                                                               |    |
|-----------------------------------------------------------------------------------------------------------------------------------------------|----|
| <b>Conflicts of interest</b> - Potential sources of influence or perceived influence on study conduct and conclusions; how these were managed | 18 |
| <b>Funding</b> - Sources of funding and other support; role of funders in data collection, interpretation, and reporting                      | 18 |

1  
2  
3  
4 \*The authors created the SRQR by searching the literature to identify guidelines,  
5 reporting standards, and critical appraisal criteria for qualitative research;  
6 reviewing the reference lists of retrieved sources; and contacting experts to gain  
7 feedback. The SRQR aims to improve the transparency of all aspects of qualitative  
8 research by providing clear standards for reporting qualitative research.  
9

10  
11  
12 \*\*The rationale should briefly discuss the justification for choosing that theory,  
13 approach, method, or technique rather than other options available, the  
14 assumptions and limitations implicit in those choices, and how those choices  
15 influence study conclusions and transferability. As appropriate, the rationale for  
16 several items might be discussed together.  
17  
18

19  
20 **Reference:**

21  
22 O'Brien BC, Harris IB, Beckman TJ, Reed DA, Cook DA. **Standards for reporting**  
23 **qualitative research: a synthesis of recommendations.** *Academic Medicine*, Vol.  
24 89, No. 9 / Sept 2014  
25

26 DOI: 10.1097/ACM.0000000000000388  
27  
28  
29  
30  
31  
32  
33  
34  
35  
36  
37  
38  
39  
40  
41  
42  
43  
44  
45  
46  
47  
48  
49  
50  
51  
52  
53  
54  
55  
56  
57  
58  
59  
60
